# Supplementary material
Source: HighWire-hosted journal article supplement (https://thorax.bmj.com/content/78/3/297)
Supplement: inline-supplementary-material-2 [file inline-supplementary-material-2.xlsx]

## Sheet: 1_16S_taxa_all_patients_dTBLs_v
Taxa	Abundance in dTBLs	Abundance in nTBLs	baseMean	Log fold-change	p-value	Adj. p-val
Bacteria.Actinobacteria.Actinobacteria.Actinomycetales.Mycobacteriaceae.Mycobacterium.403432032a5dcac89b8cb1610988f69e	0.298444	0.00674977	116.364	8.05717	4.26e-25	9.21e-23
Bacteria.Proteobacteria.Epsilonproteobacteria.Campylobacterales.Campylobacteraceae.Campylobacter.14a597495c9c251d0a3bd884e90977db	0.00247793	0.0523632	1.03716	-1.44161	0.1995	0.995105
Bacteria.Proteobacteria.Gammaproteobacteria.Chromatiales.Halothiobacillaceae.Thiofaba.acd996faade392f99f28bc503e9c347b	6.77e-05	0	0.00744452	0.643657	0.827583	0.995105
Bacteria.Proteobacteria.Gammaproteobacteria.Cardiobacteriales.Cardiobacteriaceae.Cardiobacterium.c1c8943f44cfa2ba3736b0e2d75f2b16	0.00019044	0.00176596	0.102186	0.632813	0.829923	0.995105
Bacteria.Proteobacteria.Gammaproteobacteria.Oceanospirillales.Oceanospirillaceae.Marinomonas.49dbc423c4a7da144b5eeb37d9d05733	0.000580221	0.00147689	0.145774	-0.0958105	0.973929	0.995105
Bacteria.Proteobacteria.Gammaproteobacteria.Alteromonadales.Alteromonadaceae.Gilvimarinus.c1f8fc98fa356b4c47a8f50fa9fa142a	0.000569549	0	0.0657583	0.783221	0.790985	0.995105
Bacteria.Proteobacteria.Gammaproteobacteria.Enterobacteriales.Enterobacteriaceae.Pseudomonas.f2b99a001673871809b58e7c9c61856a	0.00103194	0.00559776	0.136724	1.18945	0.634749	0.995105
Bacteria.Proteobacteria.Gammaproteobacteria.Pseudomonadales.Pseudomonadaceae.Pseudomonas.6af10ea5c29e3cb23de0f460c78a2163	0.0115758	0.0145131	1.92564	0.252397	0.793936	0.995105
Bacteria.Proteobacteria.Gammaproteobacteria.Legionellales.Legionellaceae.Legionella.fce1f65d85af55a5c8d369cdb65ecc78	0.000642987	0.000825569	0.113875	0.563534	0.847971	0.995105
Bacteria.Proteobacteria.Gammaproteobacteria.Oceanospirillales.Halomonadaceae.Chromohalobacter.fe0abdc6399b94cd758eaf2ddd91e35e	0.000683268	0	0.0703804	0.925797	0.754065	0.995105
Bacteria.Proteobacteria.Gammaproteobacteria.Oceanospirillales.Halomonadaceae.Halomonas.4eed1d9d91f28343e0c44bc2bd71c05a	0.00585537	0.00383883	0.967523	1.96834	0.198823	0.995105
Bacteria.Proteobacteria.Gammaproteobacteria.Thiotrichales.Thiotrichaceae.Thiothrix.e82764ea92a6cce9c37e9486b1c170dc	0.000687916	0	0.0468238	1.00339	0.7342	0.995105
Bacteria.Proteobacteria.Gammaproteobacteria.Xanthomonadales.Xanthomonadaceae.Lysobacter.27fdb3135177b018c55fe0748950ccf1	0.00233291	0.000509309	0.144423	0.923102	0.715018	0.995105
Bacteria.Proteobacteria.Gammaproteobacteria.Xanthomonadales.Xanthomonadaceae.Thermomonas.bdf99bd0f01d6b6259ae12aea51d706a	0.000630589	0	0.0429219	0.976537	0.741056	0.995105
Bacteria.Proteobacteria.Gammaproteobacteria.Xanthomonadales.Xanthomonadaceae.Pseudoxanthomonas.406419ab9947ee844a9bf617338ca05b	0.000858015	0.000219555	0.131791	0.937623	0.728518	0.995105
Bacteria.Proteobacteria.Gammaproteobacteria.Xanthomonadales.Xanthomonadaceae.Xanthomonas.6e7bfd8302488122ab735f8b1638aac3	0.000303674	0.00039984	0.0652302	0.725592	0.806042	0.995105
Bacteria.Proteobacteria.Gammaproteobacteria.Xanthomonadales.Xanthomonadaceae.Achromobacter.1dfad3e87026bec25ad21b02370ba6ff	0.000303674	8.2e-05	0.0355886	0.725593	0.806042	0.995105
Bacteria.Proteobacteria.Gammaproteobacteria.Pseudomonadales.Moraxellaceae.Acinetobacter.f3b178d47f09d2c2fc4e2d211747bfe8	0.0220199	0.0370678	3.25319	0.244072	0.777539	0.995105
Bacteria.Proteobacteria.Gammaproteobacteria.Enterobacteriales.Enterobacteriaceae.Profftia.a814875688548c36d94578ca42ae3e41	9.02e-05	0	0.0100284	0.678398	0.818434	0.995105
Bacteria.Proteobacteria.Gammaproteobacteria.Pseudomonadales.Moraxellaceae.Alkanindiges.1be3a3951111e62b3bbd7e0dd52b6da0	0.0024109	0.00340458	0.330283	1.01884	0.586071	0.995105
Bacteria.Proteobacteria.Gammaproteobacteria.Enterobacteriales.Enterobacteriaceae.Pantoea.5a90106a71eb6b7dd8fae5fb1b8967c8	0.00710469	0.00125243	0.462222	1.3663	0.431146	0.995105
Bacteria.Proteobacteria.Gammaproteobacteria.Enterobacteriales.Enterobacteriaceae.Budvicia.f309ea1ec8287026c5e76ba862929f85	0.000920711	0	0.138708	1.07293	0.709854	0.995105
Bacteria.Proteobacteria.Gammaproteobacteria.Enterobacteriales.Enterobacteriaceae.Proteus.ff879f5418ebe06779501b57b52cb944	0.00141066	0.00577421	0.127947	1.3117	0.65711	0.995105
Bacteria.Proteobacteria.Gammaproteobacteria.Enterobacteriales.Enterobacteriaceae.Moellerella.0962b75ed8d3c13fcf66a3c86a0128c9	0.000257312	0	0.0182056	0.713139	0.80931	0.995105
Bacteria.Proteobacteria.Gammaproteobacteria.Aeromonadales.Aeromonadaceae.Aeromonas.6570e98f6d39bacffe712be49da85a72	0.00366756	0.00477934	0.745863	-0.515034	0.769824	0.995105
Bacteria.Proteobacteria.Gammaproteobacteria.Alteromonadales.[Chromatiaceae].Alkalimonas.9a885de364c204eb310fb018084e5357	0.00018884	0	0.0292786	0.678398	0.818434	0.995105
Bacteria.Proteobacteria.Gammaproteobacteria.Alteromonadales.[Chromatiaceae].Rheinheimera.208aa356da260d9027f7dfc6b49af54d	0.00113666	0	0.147749	1.34056	0.617412	0.995105
Bacteria.Proteobacteria.Gammaproteobacteria.Pasteurellales.Pasteurellaceae.Bibersteinia.47721d1f56a0b9265e964921aa2248fb	9.64e-05	0	0.0270718	0.678398	0.818434	0.995105
Bacteria.Proteobacteria.Gammaproteobacteria.Pasteurellales.Pasteurellaceae.Actinobacillus.1f49a099a6d886e26ffc43d09e9a8baa	0.00389197	0.000654063	0.259785	0.586514	0.722065	0.995105
Bacteria.Proteobacteria.Gammaproteobacteria.Pasteurellales.Pasteurellaceae.Haemophilus.0731438b2c4dea5aa1e27215a00c4b18	4.82e-05	0	0.0149653	0.643657	0.827583	0.995105
Bacteria.Proteobacteria.Gammaproteobacteria.Pasteurellales.Pasteurellaceae.Mannheimia.26e5e0fa319e12161f3374cb4ad84de4	0.000501911	6.69e-05	0.0930417	0.904433	0.743179	0.995105
Bacteria.Proteobacteria.Gammaproteobacteria.Alteromonadales.Psychromonadaceae.Psychromonas.51638c2afd1140a79daa8b02a1a9090b	0	0.000173476	0.00822863	0.49398	0.867245	0.995105
Bacteria.Proteobacteria.Gammaproteobacteria.Pseudomonadales.Moraxellaceae.Psychrobacter.33d52877b54e4de27599aa035dfe8e9e	0.00535248	0.0261542	0.828925	0.831677	0.636531	0.995105
Bacteria.Proteobacteria.Gammaproteobacteria.Pseudomonadales.Moraxellaceae.Moraxella.6a46bdb51712191a1737a806d2d6d44b	6.57e-05	0	0.0102712	0.643657	0.827583	0.995105
Bacteria.Proteobacteria.Gammaproteobacteria.Pseudomonadales.Moraxellaceae.Enhydrobacter.04a75f1199d1bc6b58d19dd8aeb24520	0.014295	0.0242465	3.14589	0.479296	0.598217	0.995105
Bacteria.Proteobacteria.Gammaproteobacteria.Xanthomonadales.Sinobacteraceae.Hydrocarboniphaga.30193596fa89c079c7ef27a313f0cfa2	0.000459951	0	0.030646	0.854248	0.772528	0.995105
Bacteria.Proteobacteria.Betaproteobacteria.Burkholderiales.Oxalobacteraceae.Massilia.bad0c851088d436414a7f01b1aae88ef	0.00474555	0.00143072	0.5667	1.43275	0.417234	0.995105
Bacteria.Proteobacteria.Betaproteobacteria.Burkholderiales.Oxalobacteraceae.Naxibacter.09a0f08c867a618fe1f41d44c5309916	0.000223824	6.66e-05	0.0271762	0.725593	0.806042	0.995105
Bacteria.Proteobacteria.Betaproteobacteria.Rhodocyclales.Rhodocyclaceae.Azoarcus.1cee8856fa2a7b2394bfa0e10320ebe2	0.00014283	0	0.030012	0.713139	0.80931	0.995105
Bacteria.Proteobacteria.Betaproteobacteria.Rhodocyclales.Rhodocyclaceae.Denitromonas.d09cb5e8fc79f6c36c5e04949eea91ea	0.000422981	0	0.0521202	0.889839	0.763327	0.995105
Bacteria.Proteobacteria.Betaproteobacteria.Rhodocyclales.Rhodocyclaceae.Azospira.d8533dcba65d402ae5ab3e013606cded	0	0.00140044	0.0687107	-0.486001	0.869301	0.995105
Bacteria.Proteobacteria.Betaproteobacteria.Neisseriales.Neisseriaceae.Neisseria.4ef3d05269c762db631f033432d48b23	0.013258	0.00838041	2.7345	1.1433	0.422941	0.995105
Bacteria.Proteobacteria.Betaproteobacteria.Burkholderiales.Comamonadaceae.Pseudacidovorax.6f7a869f979ce3e7117fac735b26803a	0.000254207	0	0.0591924	0.78322	0.790985	0.995105
Bacteria.Proteobacteria.Betaproteobacteria.Burkholderiales.Comamonadaceae.Pseudorhodoferax.c91780e779a75eaa398741394070e0cb	0.000364409	0	0.0433172	0.818659	0.781761	0.995105
Bacteria.Proteobacteria.Betaproteobacteria.Burkholderiales.Comamonadaceae.Pelomonas.76b2b01c1e8e2f60d543a7731c2d3a33	0.000415463	0	0.0503545	0.783221	0.790985	0.995105
Bacteria.Proteobacteria.Betaproteobacteria.Burkholderiales.Comamonadaceae.Acidovorax.e9f66c7d13ad28d7220fb8754c6512f2	0.000261301	0.00017819	0.0427402	0.632801	0.83044	0.995105
Bacteria.Proteobacteria.Betaproteobacteria.Burkholderiales.Comamonadaceae.Aquamonas.95ee839040d18494facc49290e1b7b9d	0.000197122	0	0.0308136	0.713139	0.80931	0.995105
Bacteria.Proteobacteria.Betaproteobacteria.Burkholderiales.Comamonadaceae.Sphaerotilus.f8fa95e2e3957bf2e208267178cc2750	4.49e-05	0	0.0248486	0.643657	0.827583	0.995105
Bacteria.Proteobacteria.Betaproteobacteria.Burkholderiales.Comamonadaceae.Leptothrix.3b209370a9047dfdf3663a7822a11e18	0.000192892	0	0.0598611	0.74806	0.800165	0.995105
Bacteria.Proteobacteria.Betaproteobacteria.Burkholderiales.Oxalobacteraceae.Pseudoburkholderia.dc8a2f47b3d1dc2e1f5f805891976b29	0.00178433	0.00178429	0.372138	0.516188	0.807971	0.995105
Bacteria.Proteobacteria.Betaproteobacteria.Burkholderiales.Comamonadaceae.Caldimonas.8ca1f16071d6ec4063c35f053fad7c87	5.73e-05	0.00121935	0.0745741	0.072743	0.980358	0.995105
Bacteria.Proteobacteria.Betaproteobacteria.Burkholderiales.Alcaligenaceae.Bordetella.6e1ee4ac952c619b04c1871f5497b94f	0.000199206	0.00276519	0.10943	0.142864	0.958398	0.995105
Bacteria.Proteobacteria.Betaproteobacteria.Burkholderiales.Alcaligenaceae.Oligella.835f4386310acf7009fb699aa32f16cc	0.000258298	0	0.0284277	0.74806	0.800165	0.995105
Bacteria.Proteobacteria.Deltaproteobacteria.Desulfovibrionales.Desulfomicrobiaceae.Desulfomicrobium.383ac7d70fbd66f6b03dbc0c8b97bbfc	0.000243378	0	0.0892487	0.818659	0.781761	0.995105
Bacteria.Proteobacteria.Deltaproteobacteria.Desulfovibrionales.Desulfovibrionaceae.Desulfovibrio.ac3b781d52eacd79478a39274e4e6d21	0.000205223	0.00672024	0.0607413	0.246714	0.933454	0.995105
Bacteria.Proteobacteria.Deltaproteobacteria.Desulfovibrionales.Desulfovibrionaceae.Bilophila.96bc52c522f7d1d0a49d756b2ab9f012	0	0.000517688	0.023519	0.241687	0.934812	0.995105
Bacteria.Proteobacteria.Alphaproteobacteria.Sphingomonadales.Sphingomonadaceae.Sphingomonas.1006d42c9984f242af419f88f8f30b61	0.00619049	0.0101886	0.930242	-0.0997482	0.936088	0.995105
Bacteria.Proteobacteria.Alphaproteobacteria.Sphingomonadales.Sphingomonadaceae.Sphingobium.da8dbb9356ed5e68256a9c9ec39bdbdc	0.00166908	0.00218234	0.32914	0.291394	0.865278	0.995105
Bacteria.Proteobacteria.Alphaproteobacteria.Sphingomonadales.Sphingomonadaceae.Sphingosinicella.f922bb836523db0b8e265a464de54690	5.43e-05	0	0.0156505	0.643657	0.827583	0.995105
Bacteria.Proteobacteria.Alphaproteobacteria.Sphingomonadales.Erythrobacteraceae.Porphyrobacter.8fdc8fd2b1c121b57387dc894866d98b	0.000854195	0	0.133526	1.07286	0.716562	0.995105
Bacteria.Proteobacteria.Alphaproteobacteria.Sphingomonadales.Sphingomonadaceae.Novosphingobium.36faca38e62a8e280ac588a2bd4c1eaf	0.00296537	0.00379482	0.45148	1.2976	0.518004	0.995105
Bacteria.Proteobacteria.Alphaproteobacteria.Rhizobiales.Xanthobacteraceae.Xanthobacter.e4d4ae5548ed3f755d2448f46005f9b8	4.86e-05	0	0.0151951	0.643657	0.827583	0.995105
Bacteria.Proteobacteria.Alphaproteobacteria.Caulobacterales.Caulobacteraceae.Asticcacaulis.31522f6854fcca3f25ad841060815407	0.000121689	0	0.0177001	0.713139	0.80931	0.995105
Bacteria.Proteobacteria.Alphaproteobacteria.Caulobacterales.Caulobacteraceae.Brevundimonas.4bb96d7ec191f9f114463f425bca5f72	0.0129028	0.00449502	0.40683	0.131336	0.940447	0.995105
Bacteria.Proteobacteria.Alphaproteobacteria.Caulobacterales.Caulobacteraceae.Arthrospira.63fca616d2f61d5e4c5fe6abfac12ae0	0.000475185	0	0.0764284	0.889839	0.763327	0.995105
Bacteria.Proteobacteria.Alphaproteobacteria.Caulobacterales.Caulobacteraceae.Caulobacter.1f4ef18c90ab7e6bb057e3ed89fbaa9f	0.00801793	0	0.0598611	0.74806	0.800165	0.995105
Bacteria.Proteobacteria.Alphaproteobacteria.Rhizobiales.Beijerinckiaceae.Chelatococcus.62a8ccc4a0b25cb8d3b394789fb5cb3a	9.44e-05	0	0.0146393	0.643657	0.827583	0.995105
Bacteria.Proteobacteria.Alphaproteobacteria.Rhizobiales.Methylobacteriaceae.Methylobacterium.13ef39327a9a40ce5f44f8b27db52c7c	0.00984821	0.017013	2.10904	-0.425543	0.681407	0.995105
Bacteria.Proteobacteria.Alphaproteobacteria.Rhizobiales.Beijerinckiaceae.Salinarimonas.552a42fe946bd10def04d32af880b42c	0.00103943	0.00247472	0.218338	0.850249	0.730307	0.995105
Bacteria.Proteobacteria.Alphaproteobacteria.Rhodobacterales.Rhodobacteraceae.Albidovulum.c4c78b8f20425db24e1528a9fb9b33c3	5.15e-05	0	0.0104486	0.643657	0.827583	0.995105
Bacteria.Proteobacteria.Alphaproteobacteria.Rhodobacterales.Rhodobacteraceae.Haematobacter.63f023ad464aa1abe0c45ecb0b9fdc37	0.00241504	0	0.365159	2.03458	0.32379	0.995105
Bacteria.Proteobacteria.Alphaproteobacteria.Rhizobiales.Phyllobacteriaceae.Aquamicrobium.fb73015535cf8463efbc5c960778979d	0.000347504	0	0.0453239	0.818659	0.781761	0.995105
Bacteria.Proteobacteria.Alphaproteobacteria.Rhizobiales.Aurantimonadaceae.Aurantimonas.fe88a5383fa7ab7980c2bd44375e259f	0	0.000306419	0.0395505	0.373088	0.89953	0.995105
Bacteria.Proteobacteria.Alphaproteobacteria.Rhizobiales.Bartonellaceae.Bartonella.63d89a9abb11b1d958a294837ef73e74	6.31e-05	0.0159355	0.0177246	0.678398	0.818434	0.995105
Bacteria.Proteobacteria.Alphaproteobacteria.Rhizobiales.Rhizobiaceae.Rhizobium.d201ef05844489782f0eebffc3f14194	0.033019	0.0333237	2.65114	1.93745	0.237752	0.995105
Bacteria.Proteobacteria.Alphaproteobacteria.Rhizobiales.Methylocystaceae.Pleomorphomonas.bd0420d0a56d9afa882a42acdffe50b1	0.000135373	0	0.014889	0.678398	0.818434	0.995105
Bacteria.Proteobacteria.Alphaproteobacteria.Rhodospirillales.Acetobacteraceae.Roseomonas.2ef96f4d19cfd273e3494f6b373fae32	4.82e-05	0	0.0135359	0.643657	0.827583	0.995105
Bacteria.Spirochaetes.Spirochaetes.Spirochaetales.Spirochaetaceae.Treponema.2ad42536fe00a05b1cea41505155c624	0.000252183	0	0.0496121	0.74806	0.800165	0.995105
Bacteria.Proteobacteria.Deltaproteobacteria.Bdellovibrionales.Bacteriovoracaceae.Peredibacter.8ce24c58518d465beccb308202e76b1c	4.76e-05	0.000455373	0.0295639	0.469704	0.873711	0.995105
Bacteria.Proteobacteria.Alphaproteobacteria.Rhodospirillales.Rhodospirillaceae.Enhydrobacter.f07c81418a12fac9b50ea54caded9841	6.28e-05	0.000449135	0.0491467	0.442248	0.881033	0.995105
Bacteria.Fusobacteria.Fusobacteriia.Fusobacteriales.Leptotrichiaceae.Streptobacillus.0d2daf82e641596d20fed7336278f7ab	0.000239372	0.00013274	0.087028	0.668218	0.80935	0.995105
Bacteria.Lentisphaerae.[Lentisphaeria].Victivallales.Victivallaceae.Victivallis.d7aa7a0ff6365e77367c066ac870ed74	0.000103082	0	0.0208973	0.678398	0.818434	0.995105
Bacteria.Bacteroidetes.Cytophagia.Cytophagales.Flammeovirgaceae.Marinoscillum.b888c128917c9e774de7aea72ee637fe	6.57e-05	0	0.0102712	0.643657	0.827583	0.995105
Bacteria.Bacteroidetes.Sphingobacteriia.Sphingobacteriales.Sphingobacteriaceae.Mucilaginibacter.cef94d778253d70f69b517b478d0ccd2	0.00174445	0.000652475	0.186119	0.953744	0.743257	0.995105
Bacteria.Bacteroidetes.Sphingobacteriia.Sphingobacteriales.Sphingobacteriaceae.Pedobacter.0e8209d368832bd8ba51e902c0ae75cb	0.00135504	6.69e-05	0.170144	1.3104	0.574901	0.995105
Bacteria.Bacteroidetes.[Saprospirae].[Saprospirales].Chitinophagaceae.Terrimonas.323fc0a5a127cdc83d9171a27b93156b	0.000284185	0	0.0520831	0.783221	0.790985	0.995105
Bacteria.Bacteroidetes.[Saprospirae].[Saprospirales].Chitinophagaceae.Ferruginibacter.133ed11d20137bb87a99f9fb3d1aad51	0.000223231	8.91e-05	0.0553622	0.655512	0.824455	0.995105
Bacteria.Bacteroidetes.[Saprospirae].[Saprospirales].Chitinophagaceae.Trachelomonas.c426c7a58663d2f894f546c026bb7279	0.00144556	0.00129538	0.0786809	-0.222929	0.939846	0.995105
Bacteria.Bacteroidetes.[Saprospirae].[Saprospirales].Chitinophagaceae.Parasegitibacter.39bd57cfd1ed69dea62041310cb90b39	0.000131415	0	0.0205424	0.678398	0.818434	0.995105
Bacteria.Bacteroidetes.Bacteroidia.Bacteroidales.Rikenellaceae.Alistipes.128d098a0f85253d7c68558aa2e2edaa	0.00194358	0.0013033	0.156687	-0.0631492	0.981284	0.995105
Bacteria.Bacteroidetes.Bacteroidia.Bacteroidales.Porphyromonadaceae.Petrimonas.5bcabcb76434efbb4a07c905e9f8c947	0.000270746	0.000141323	0.0590021	0.632801	0.83044	0.995105
Bacteria.Bacteroidetes.Bacteroidia.Bacteroidales.Porphyromonadaceae.Vestibaculum.e7f570372730567b27a0f790f81e24d0	3.43e-05	0	0.0133637	0.643657	0.827583	0.995105
Bacteria.Bacteroidetes.Bacteroidia.Bacteroidales.Porphyromonadaceae.Macellibacteroides.b7972cec4a1f081c7dd2bb2e87160853	0.000300628	0.000117938	0.0789345	0.832211	0.778237	0.995105
Bacteria.Bacteroidetes.Bacteroidia.Bacteroidales.Porphyromonadaceae.Porphyromonas.9e06ff8f82499e1f457e55e8a7157d0d	0.00432362	0.00506144	1.04285	0.0957102	0.948065	0.995105
Bacteria.Bacteroidetes.Bacteroidia.Bacteroidales.Prevotellaceae.Prevotella.215b1989c35d7fc6ff6194244744d7fd	0.108889	0.127527	26.6928	0.374899	0.544645	0.995105
Bacteria.Bacteroidetes.Bacteroidia.Bacteroidales.[Paraprevotellaceae].[Prevotella].15a3b1db98e2773a35c66e3c89fc4069	0.000604457	0.000407745	0.18074	0.452885	0.845255	0.995105
Bacteria.Bacteroidetes.Bacteroidia.Bacteroidales.[Paraprevotellaceae].Paraprevotella.36009a1a784a332284124f870270d589	0.000103082	0.00224083	0.0208973	0.678398	0.818434	0.995105
Bacteria.Bacteroidetes.Bacteroidia.Bacteroidales.Marinilabiaceae.Cytophaga.08e5996d843b3203b06163edc542cdef	0.00346471	0.00029274	0.501178	2.26216	0.28434	0.995105
Bacteria.Bacteroidetes.Bacteroidia.Bacteroidales.Bacteroidaceae.Bacteroides.eae0738ba858df2d22433de0913bc58c	0.00771468	0.00643962	1.30192	1.35252	0.272101	0.995105
Bacteria.Bacteroidetes.Flavobacteriia.Flavobacteriales.Flavobacteriaceae.Lutibacter.10ee7c2f524cbdebee04e798574a2116	0	7.66e-05	0.00988763	0.551611	0.851929	0.995105
Bacteria.Bacteroidetes.Flavobacteriia.Flavobacteriales.Flavobacteriaceae.Flavobacterium.e10f05534a632d6a0f8e7f1c0919e8eb	0.000145921	0.00140304	0.0747928	-0.343128	0.907519	0.995105
Bacteria.Bacteroidetes.Flavobacteriia.Flavobacteriales.[Weeksellaceae].Wautersiella.d7944fa2f02466df16559a77be96b11a	0.00065238	0.00253823	0.136056	-0.16256	0.945822	0.995105
Bacteria.Bacteroidetes.Flavobacteriia.Flavobacteriales.[Weeksellaceae].Weeksella.7ef94eaaa5413f5b3a0ced7097dd236c	3.1e-05	0.00167195	0.144474	-0.326217	0.910709	0.995105
Bacteria.Bacteroidetes.Flavobacteriia.Flavobacteriales.[Weeksellaceae].Elizabethkingia.a68f1205d4074f8928125564ed7681d2	0.0258964	0.0158987	3.50107	1.16897	0.269621	0.995105
Bacteria.Bacteroidetes.Flavobacteriia.Flavobacteriales.[Weeksellaceae].Bergeyella.bcdaa03ad79c6570ef429a94952175ca	0.00178039	0.000576654	0.275683	1.37219	0.584902	0.995105
Bacteria.[Thermi].Deinococci.Deinococcales.Trueperaceae.Truepera.bf991db3249937049e80d12840efa7dc	0.000371675	0	0.0468962	0.854249	0.772528	0.995105
Bacteria.Firmicutes.Clostridia.Clostridiales.[Tissierellaceae].Finegoldia.8dc4520cb0b6df47a8b7d0832a252cb0	0.0108251	0.0271817	1.52594	-0.220289	0.861424	0.995105
Bacteria.Firmicutes.Bacilli.Haloplasmatales.Haloplasmataceae.Haloplasma.f602d6ff85ddf1bf0ee685e4f5912171	5.08e-05	0	0.0118385	0.643657	0.827583	0.995105
Bacteria.Firmicutes.Bacilli.Bacillales.Alicyclobacillaceae.Alicyclobacillus.1e8259fa619a18b1968c52d6e0d533ab	7.3e-05	0.00012054	0.0167314	0.586029	0.842806	0.995105
Bacteria.Firmicutes.Clostridia.Clostridiales.[Tissierellaceae].Peptoniphilus.244197657e8c6f47a0b10a5ec21b4ee2	0.00958557	0.0269221	2.23421	0.286896	0.827982	0.995105
Bacteria.Firmicutes.Clostridia.Clostridiales.[Tissierellaceae].WAL_1855D.d9edfe40997a6da1040fecb878feb158	0.000126014	0.00711971	0.0906612	-0.339812	0.903981	0.995105
Bacteria.Firmicutes.Clostridia.Clostridiales.[Tissierellaceae].1-68.e69dfc6e24c99c0e6d29bb3cdcff01da	0	0.000248385	0.0146382	0.551611	0.851929	0.995105
Bacteria.Firmicutes.Clostridia.Clostridiales.Peptostreptococcaceae.Clostridium.6eb3f747505b027607654373c88891d2	0.00166644	0	0.0829369	0.854248	0.772528	0.995105
Bacteria.Firmicutes.Clostridia.Clostridiales.Peptostreptococcaceae.[Clostridium].1a0b1855c9f3ea22a57f898b23e3de48	0.000188312	8.91e-05	0.0388819	0.761031	0.796771	0.995105
Bacteria.Firmicutes.Clostridia.Clostridiales.[Mogibacteriaceae].Mogibacterium.7f0b063ceb89803b6b52917d30b5555b	9.07e-05	7.32e-05	0.0260848	0.62077	0.833619	0.995105
Bacteria.Firmicutes.Clostridia.Clostridiales.Peptococcaceae.Peptococcus.6f05bbb7b495e6ffda5b2dacaf47c75c	9.52e-05	0	0.020008	0.678398	0.818434	0.995105
Bacteria.Firmicutes.Clostridia.Clostridiales.Clostridiaceae.Clostridium.f52c7d052641860703cab377fe3ccdc0	0.000395165	0.000401238	0.144011	0.420446	0.875565	0.995105
Bacteria.Firmicutes.Clostridia.Clostridiales.Ruminococcaceae.Oscillospira.9afec21f94117501214e65e1c9f2ca4a	0.000309246	0.000244678	0.0845214	0.644705	0.827296	0.995105
Bacteria.Firmicutes.Clostridia.Clostridiales.Ruminococcaceae.Sporobacter.6f26f9a78c7992c88f7e8d96b645bff5	0.00122545	0	0.0560885	1.02492	0.72872	0.995105
Bacteria.Firmicutes.Clostridia.Clostridiales.Lachnospiraceae.Lactonifactor.5696d275f92d894d076c3493d33f690a	0	0.000326238	0.0291061	0.373088	0.89953	0.995105
Bacteria.Firmicutes.Clostridia.Clostridiales.Lachnospiraceae.Roseburia.004ca9d14962355f711fea88ca840425	0.000851613	0	0.136161	1.11201	0.634474	0.995105
Bacteria.Firmicutes.Clostridia.Clostridiales.Lachnospiraceae.Clostridium.2acc0eeaf11d4e05a0275b4614e23db2	0.00173075	0.00280051	0.501594	-0.143421	0.935032	0.995105
Bacteria.Firmicutes.Clostridia.Clostridiales.Lachnospiraceae.Bacteroides.b3dbccceff0f44f865957eb9ff5fecb9	0.000395632	0	0.0342457	0.78322	0.790985	0.995105
Bacteria.Firmicutes.Clostridia.Clostridiales.Lachnospiraceae.Butyrivibrio.3d0a443b28cb55ee49afc9943974489a	0.000423083	0.00183704	0.19365	-0.120582	0.961597	0.995105
Bacteria.Firmicutes.Clostridia.Clostridiales.Lachnospiraceae.Lachnoanaerobaculum.ed76405b72d79e786349562d5456231c	0.000193727	0.000933072	0.138353	-0.13268	0.95804	0.995105
Bacteria.Firmicutes.Clostridia.Clostridiales.Lachnospiraceae.Moryella.f2eb2a64d406256d613e235411b49b5e	3.98e-05	0.000265481	0.065639	0.407507	0.890318	0.995105
Bacteria.Firmicutes.Clostridia.Clostridiales.Lachnospiraceae.Hespellia.5830b9e0ec7b2fc87b4b20c93272c44e	0.00010856	0	0.031301	0.678398	0.818434	0.995105
Bacteria.Firmicutes.Clostridia.Clostridiales.Lachnospiraceae.Ruminococcus.81fb9360f5e5db4f7d99b5f099c691bf	0.00131153	0	0.175336	1.43733	0.563694	0.995105
Bacteria.Firmicutes.Clostridia.Clostridiales.Lachnospiraceae.Marvinbryantia.1de8a8bc685293bc92fccfd080dd1a64	0	0.000163119	0.0145531	0.49398	0.867245	0.995105
Bacteria.Firmicutes.Clostridia.Clostridiales.Lachnospiraceae.Robinsoniella.e7a216fb20e1ac5d7d3518ee6ae12c30	0.000864304	0	0.094785	0.889839	0.763327	0.995105
Bacteria.Firmicutes.Clostridia.Clostridiales.Lachnospiraceae.Dorea.63dd3986b722a781191c5053e5b46443	0.00272924	0.00453897	0.357132	1.52414	0.444335	0.995105
Bacteria.Tenericutes.Mollicutes.Mycoplasmatales.Mycoplasmataceae.Ureaplasma.392d582808b9f2a7f10a8cb6caa81a99	4.55e-05	0	0.0171136	0.643657	0.827583	0.995105
Bacteria.Firmicutes.Clostridia.Clostridiales.Lachnospiraceae.Catonella.1d8b6c8b0d3d0f26e19363a56b040683	0	6.69e-05	0.016085	0.551611	0.851929	0.995105
Bacteria.Firmicutes.Clostridia.Clostridiales.Ruminococcaceae.Clostridium.349bab8da37ab503ccfc4de9df2f71ae	0.000169299	8.16e-05	0.0349806	0.690432	0.815268	0.995105
Bacteria.Firmicutes.Clostridia.Clostridiales.Ruminococcaceae.Ethanoligenens.49604f52e41c084476c1e4f2574206dd	0.000541492	0.000918598	0.0595562	0.889839	0.763327	0.995105
Bacteria.Firmicutes.Clostridia.Clostridiales.Ruminococcaceae.Gemmiger.5a6289b8068d8b7722dafb10cc3d0b76	0.000317908	0.000431668	0.0843988	0.482776	0.862612	0.995105
Bacteria.Firmicutes.Clostridia.Clostridiales.Ruminococcaceae.Faecalibacterium.b167ad9fdf6c2158e6e90d7756049242	0.00388968	0.00516218	1.01435	0.0831197	0.952069	0.995105
Archaea.Euryarchaeota.Methanobacteria.Methanobacteriales.Methanobacteriaceae.Methanobrevibacter.494e7cb040a86bd3d91e7066a86d06d0	0.000668807	0	0.0739759	0.961827	0.74482	0.995105
Archaea.Crenarchaeota.Thaumarchaeota.Nitrososphaerales.Nitrososphaeraceae.Candidatus.Nitrososphaera.fbc0404eaec68e07cb9d7a0945a37961	0	0.000923574	0.0367255	-0.09254	0.975012	0.995105
Bacteria.Cyanobacteria.Oscillatoriophycideae.Oscillatoriales.Phormidiaceae.Arthrospira.330b2967113c7906096404aafd0b391d	0.000158253	0	0.0136983	0.678398	0.818434	0.995105
Bacteria.Cyanobacteria.Nostocophycideae.Nostocales.Scytonemataceae.Brasilonema.2f2a9e29fe8b3a00cd0f385641035be4	0.000133761	0.000570916	0.0657309	0.243954	0.934199	0.995105
Bacteria.Cyanobacteria.Oscillatoriophycideae.Chroococcales.Xenococcaceae.Chroococcidiopsis.a5c805d36f3bc83b77255f4483e66891	0.000852636	0	0.0679571	0.997948	0.735588	0.995105
Bacteria.Firmicutes.Clostridia.Clostridiales.Veillonellaceae.Selenomonas.4da1b1b2e428318ec9623defd4476d0c	0.000378214	0.00147541	0.108579	0.890428	0.724433	0.995105
Bacteria.Firmicutes.Clostridia.Clostridiales.Veillonellaceae.Mitsuokella.b1e26d0956676effc6f659d132ed4dff	0.000535045	0	0.0591808	0.889839	0.763327	0.995105
Bacteria.Firmicutes.Clostridia.Clostridiales.Veillonellaceae.Schwartzia.ce5c3a7245ba9821b02fc3a42e08abe9	0	7.16e-05	0.011202	0.551611	0.851929	0.995105
Bacteria.Firmicutes.Clostridia.Clostridiales.Veillonellaceae.Anaerosinus.5c76bdf5d4af155634aae61fcd866804	0.0254116	0.0300291	7.18793	0.471194	0.678732	0.995105
Bacteria.Firmicutes.Clostridia.Clostridiales.Veillonellaceae.Megasphaera.eb7176dbda53db07c5bcd55baebd6889	0.00388146	0.000326238	0.0681517	0.653689	0.824923	0.995105
Bacteria.Firmicutes.Clostridia.Clostridiales.Veillonellaceae.vadinHB04.d6e5bfa8ca3f1187d362531917c75f1d	0	0.000943507	0.044106	0.107893	0.970871	0.995105
Bacteria.Firmicutes.Clostridia.Clostridiales.Veillonellaceae.Acidaminococcus.82f3097fdc92a93b65db73518aa1544e	0	0.00016988	0.00674909	0.49398	0.867245	0.995105
Bacteria.Firmicutes.Clostridia.Clostridiales.Veillonellaceae.Succinispira.65654770a942b3ed73ed3001ce78e695	0.000267523	0.00185912	0.0495441	0.632801	0.83044	0.995105
Bacteria.Firmicutes.Clostridia.Clostridiales.Veillonellaceae.Acetonema.0fb76b8716d6bd72017faf3018d91e1d	0	0.000589692	0.0275663	0.308477	0.916858	0.995105
Bacteria.Firmicutes.Erysipelotrichi.Erysipelotrichales.Erysipelotrichaceae.Sharpea.b1ebdc7dc82cf510768b062efab89fc9	0.00016284	0	0.0469515	0.713139	0.80931	0.995105
Bacteria.Firmicutes.Erysipelotrichi.Erysipelotrichales.Erysipelotrichaceae.Catenibacterium.9b119c3c0fa910deca32fd7571866de7	0.000564131	0.000734035	0.230408	0.427932	0.871422	0.995105
Bacteria.Firmicutes.Erysipelotrichi.Erysipelotrichales.Erysipelotrichaceae.Bulleidia.130fbd0b83784b157b5456c4a5e7b31c	0.000340566	0	0.0772749	0.818659	0.781761	0.995105
Bacteria.Firmicutes.Erysipelotrichi.Erysipelotrichales.Erysipelotrichaceae.[Eubacterium].c54bf70908b1db0f88baa5d62cbedb52	0.000432834	0.000205925	0.120342	0.716608	0.776384	0.995105
Bacteria.Synergistetes.Synergistia.Synergistales.Dethiosulfovibrionaceae.Pyramidobacter.0759b6ce159628127fb1e1ec1822d4ca	0	0.00153126	0.044041	-0.195898	0.947129	0.995105
Bacteria.Actinobacteria.Coriobacteriia.Coriobacteriales.Coriobacteriaceae.Atopobium.bba6da0e81f92e0b2af4e957cd69f42e	0.00103539	0.00014637	0.212247	1.15495	0.59374	0.995105
Bacteria.Actinobacteria.Coriobacteriia.Coriobacteriales.Coriobacteriaceae.Collinsella.24a243c38014e2daa1fadd8c23ec578f	0.0015991	0.000673703	0.124295	0.864859	0.75289	0.995105
Bacteria.Actinobacteria.Acidimicrobiia.Acidimicrobiales.C111.Ilumatobacter.dc11664bc5502bf01944fb43b8f929b0	0.000367282	0	0.0585945	0.818659	0.781761	0.995105
Bacteria.Actinobacteria.Actinobacteria.Actinomycetales.ACK-M1.Planktophila.2979c053db11fc54c100e34504aabf25	0.000127681	0	0.0311045	0.678398	0.818434	0.995105
Bacteria.Actinobacteria.Actinobacteria.Actinomycetales.Propionibacteriaceae.Propionibacterium.355c3240c6a55a96ef70dd3701c96392	0.000442247	0.00153688	0.0964664	0.75246	0.769446	0.995105
Bacteria.Actinobacteria.Actinobacteria.Actinomycetales.Nocardioidaceae.Nocardioides.5300c6e239421019813096892de65771	0.00273416	0.00730072	0.704365	-0.747293	0.582906	0.995105
Bacteria.Actinobacteria.Actinobacteria.Actinomycetales.Nocardioidaceae.Marmoricola.ddc8ce86b5a361f7af0b58d8c1d42f45	0.000216076	0.00024108	0.0418779	0.528398	0.85809	0.995105
Bacteria.Actinobacteria.Actinobacteria.Actinomycetales.Streptomycetaceae.Streptomyces.e077f7faf48e5aad47b13af6835db552	0.00125893	0.00015321	0.126104	1.0738	0.71309	0.995105
Bacteria.Actinobacteria.Actinobacteria.Actinomycetales.Frankiaceae.Actinomycetales.9b40d34ef71f7d9d56ca7891e3f4e043	4.51e-05	0	0.00501418	0.643657	0.827583	0.995105
Bacteria.Actinobacteria.Actinobacteria.Actinomycetales.Pseudonocardiaceae.Actinomycetospora.fd5c732c79ff61262c7555ee3ba719d3	0.00302907	0.000488722	0.267592	0.85555	0.658775	0.995105
Bacteria.Actinobacteria.Actinobacteria.Actinomycetales.Intrasporangiaceae.Ornithinimicrobium.6931a2d4d5eff1731b7185469c077bca	0.00365651	0	0.349606	2.17407	0.3241	0.995105
Bacteria.Actinobacteria.Actinobacteria.Actinomycetales.Intrasporangiaceae.Arsenicicoccus.d08816da2208006272450d0deb990bb6	0.000206164	0	0.0417945	0.74806	0.800165	0.995105
Bacteria.Actinobacteria.Actinobacteria.Actinomycetales.Micrococcaceae.Rothia.a38d5871c6a2558a5483e235b81ccea7	0.000421259	0.00017819	0.164321	0.811277	0.742452	0.995105
Bacteria.Actinobacteria.Actinobacteria.Actinomycetales.Micrococcaceae.Kocuria.f280486137effb019545eb4d700ff8fd	0.0175201	0.0253802	4.48837	0.609079	0.370297	0.995105
Bacteria.Actinobacteria.Actinobacteria.Actinomycetales.Micrococcaceae.Micrococcus.ef366129b50b5ea424db24e708a75ba3	0.00454931	0.0078459	0.401988	1.87788	0.269021	0.995105
Bacteria.Actinobacteria.Actinobacteria.Actinomycetales.Micrococcaceae.Arthrobacter.6b780e361cfc5f06def718518324bdcb	0.00981711	0.00897007	0.714099	0.896234	0.467799	0.995105
Bacteria.Actinobacteria.Actinobacteria.Actinomycetales.Microbacteriaceae.Leifsonia.009c0490f447bd0906ccd1112dfc0e41	0.00178619	0.00282646	0.0222309	0.678398	0.818434	0.995105
Bacteria.Actinobacteria.Actinobacteria.Actinomycetales.Microbacteriaceae.Frondihabitans.d43ffdef0c9753d5a1b3aa9ca9edfcf3	0	0.00015321	0.0150204	0.551611	0.851929	0.995105
Bacteria.Actinobacteria.Actinobacteria.Actinomycetales.Promicromonosporaceae.Xylanimicrobium.b959654b051fd245f2011066f7b28a1b	0	0.00012054	0.0102274	0.551611	0.851929	0.995105
Bacteria.Actinobacteria.Actinobacteria.Actinomycetales.Actinomycetaceae.Varibaculum.f8e68b40daeefc9c78cea2012d7da4eb	0.000152524	0.00048912	0.102311	0.345589	0.906887	0.995105
Bacteria.Actinobacteria.Actinobacteria.Actinomycetales.Actinomycetaceae.Actinomyces.9c1454b23d7b9e86ad391e0b238ee420	0.00880448	0.0532456	1.79865	0.210809	0.840191	0.995105
Bacteria.Actinobacteria.Actinobacteria.Bifidobacteriales.Bifidobacteriaceae.Alloscardovia.9a9350fe6364a71c29b86f38e57dbbd4	0	0.000267648	0.0643401	0.373088	0.89953	0.995105
Bacteria.Actinobacteria.Actinobacteria.Bifidobacteriales.Bifidobacteriaceae.Gardnerella.25d1232b636c9951b58814d31052467f	0.0027196	0.00112444	0.296213	0.782804	0.727666	0.995105
Bacteria.Actinobacteria.Actinobacteria.Bifidobacteriales.Bifidobacteriaceae.Bifidobacterium.8d29a4b0e2aa4632d98d3b302ea9ef31	0.00101611	0.000554167	0.172649	0.762205	0.729363	0.995105
Bacteria.Actinobacteria.Actinobacteria.Actinomycetales.Brevibacteriaceae.Brevibacterium.787f39d82237e5b0119f08039824d15e	0.00254397	0.00044367	0.249298	0.920737	0.67358	0.995105
Bacteria.Actinobacteria.Actinobacteria.Actinomycetales.Geodermatophilaceae.Blastococcus.fad7959733a200344fe5a2a9f6252f81	0.0015575	0.00234963	0.313131	0.375702	0.841478	0.995105
Bacteria.Actinobacteria.Actinobacteria.Actinomycetales.Dietziaceae.Dietzia.611f22c4148835b3347e113a625e4b3f	0.00655285	0.0112393	1.16838	-0.483317	0.670729	0.995105
Bacteria.Actinobacteria.Actinobacteria.Actinomycetales.Nocardiaceae.Rhodococcus.cfe98556a6250bcf6e8e6a65edc2cdee	5.02e-05	0	0.00489242	0.643657	0.827583	0.995105
Bacteria.Actinobacteria.Actinobacteria.Actinomycetales.Gordoniaceae.Millisia.0eec78dd11e070d018fcebdf77e068f7	0.000845771	0	0.0659408	0.997948	0.735588	0.995105
Bacteria.Actinobacteria.Actinobacteria.Actinomycetales.Corynebacteriaceae.Corynebacterium.8a82820cc1075421faf42ec4285f23b3	0.0764168	0.0853081	17.8897	-0.318076	0.556895	0.995105
Bacteria.Actinobacteria.Actinobacteria.Actinomycetales.Geodermatophilaceae.Actinotelluria.833dfe956dff1abbb2d410875b168bfb	0	0.00072324	0.0613641	0.241687	0.934812	0.995105
Bacteria.Actinobacteria.Actinobacteria.Actinomycetales.Nakamurellaceae.Humicoccus.a41b416995a433f186303290d0d81c85	0	0.000345125	0.0156793	0.373088	0.89953	0.995105
Bacteria.Actinobacteria.Actinobacteria.Actinomycetales.Nakamurellaceae.Nakamurella.b4a03c84c369c0f8f4f304bd52ce07b1	0.000468165	0	0.0517832	0.854248	0.772528	0.995105
Bacteria.Actinobacteria.Thermoleophilia.Solirubrobacterales.Solirubrobacteraceae.Solirubrobacter.7dac736348fa1e66320dc4269fdcb80b	0.00132621	0.00169842	0.149653	1.41275	0.625564	0.995105
Bacteria.Actinobacteria.Thermoleophilia.Gaiellales.Gaiellaceae.Gaiella.e5b018058076e271a017fdadafc957ff	0.000344689	0.000547381	0.0847134	0.213419	0.929906	0.995105
Bacteria.Planctomycetes.Planctomycetia.Gemmatales.Isosphaeraceae.Nostocoida.3df1358918971223e96ba36eaf1ed8f3	0	0.000267284	0.0280174	0.435286	0.882896	0.995105
Bacteria.Verrucomicrobia.Verrucomicrobiae.Verrucomicrobiales.Verrucomicrobiaceae.Haloferula.00ee32251dcdd8f349be928893035cb0	0	0.0168012	0.0655152	0.241688	0.934811	0.995105
Bacteria.Firmicutes.Bacilli.Bacillales.[Thermicanaceae].Thermicanus.0e8e8013a43f936ffdbcabe02759c427	0.000432152	0	0.0374438	0.818659	0.781761	0.995105
Bacteria.Firmicutes.Bacilli.Bacillales.Paenibacillaceae.Paenibacillus.aa3537df624513208d209d3f6cb35b02	0.000221762	6.64e-05	0.0392365	0.655512	0.824455	0.995105
Bacteria.Firmicutes.Bacilli.Bacillales.Paenibacillaceae.Brevibacillus.babef9136e52ee48b3288bdd0035d60e	0.00117586	0	0.108279	1.26939	0.667498	0.995105
Bacteria.Firmicutes.Bacilli.Bacillales.Planococcaceae.Bacillus.6d350e1fecb972294579217f2a162e80	4.06e-05	0	0.0148748	0.643657	0.827583	0.995105
Bacteria.Firmicutes.Bacilli.Bacillales.Listeriaceae.Brochothrix.ecfe86307ef82349547adb9ca8c879df	0.00448007	0.00321083	0.280738	-0.151877	0.949566	0.995105
Bacteria.Firmicutes.Bacilli.Bacillales.Bacillaceae.Marinococcus.a0f15be3bc15acedc9fb2f5909896cc8	4.51e-05	0	0.00501418	0.643657	0.827583	0.995105
Bacteria.Firmicutes.Bacilli.Bacillales.Planococcaceae.Kurthia.c740f718c86d6e26b1435cabd580ffd7	0.000225471	0	0.0550659	0.818659	0.781761	0.995105
Bacteria.Firmicutes.Bacilli.Bacillales.Bacillaceae.Bacillus.225c214be44851578ee9fbe5f47a2c6f	0.00252668	0.0183487	0.411303	0.705517	0.643044	0.995105
Bacteria.Firmicutes.Bacilli.Lactobacillales.Aerococcaceae.Alloiococcus.fdb77967f908752412f454de1ff74bbf	0.0038972	0.000393749	0.842259	2.85483	0.141657	0.995105
Bacteria.Firmicutes.Bacilli.Lactobacillales.Streptococcaceae.Streptococcus.4f8be9e6fa2b39e170a7791c92ba0306	0.0810379	0.110765	19.9504	0.458472	0.414837	0.995105
Bacteria.Firmicutes.Bacilli.Lactobacillales.Aerococcaceae.Granulicatella.ff7d4bee8575f9b437d41aecf5fb05fc	0.000216076	0	0.0187219	0.713139	0.80931	0.995105
Bacteria.Firmicutes.Bacilli.Lactobacillales.Aerococcaceae.Lacticigenium.9a79aa9fa61c27c45863d70e5de6d2ba	0.00334662	0.000248385	0.178644	1.20664	0.673149	0.995105
Bacteria.Firmicutes.Bacilli.Lactobacillales.Carnobacteriaceae.Isobaculum.3ad0f1717572fc8c5e6ec06674a0907b	0.000177457	0.00154291	0.119144	0.247304	0.927654	0.995105
Bacteria.Firmicutes.Bacilli.Lactobacillales.Leuconostocaceae.Weissella.620edd2956ede81b09704c3f3f5657fa	0.00132296	0.00240687	0.2113	0.66502	0.764194	0.995105
Bacteria.Firmicutes.Bacilli.Lactobacillales.Leuconostocaceae.Oenococcus.e16be6de6436803e3b84a5b5a648bb17	0.000192068	0	0.0167618	0.74806	0.800165	0.995105
Bacteria.Firmicutes.Bacilli.Lactobacillales.Lactobacillaceae.Pediococcus.21c47ce7835c803aede78d5bf66c8791	0.000247031	0	0.0550008	0.783221	0.790985	0.995105
Bacteria.Firmicutes.Bacilli.Lactobacillales.Lactobacillaceae.Lactobacillus.6658f31f4b3defccbc037636b27672e0	0.0015628	0.00186935	0.300897	0.494697	0.770396	0.995105
Bacteria.Firmicutes.Bacilli.Bacillales.Planococcaceae.Staphylococcus.ed731f07a20332ea13fc88a1752b45ed	0.00610976	0.00471142	0.519062	0.608511	0.729942	0.995105
Bacteria.Firmicutes.Bacilli.Bacillales.Staphylococcaceae.Macrococcus.23170b75adb12d09ce332a4b82fb06e7	0.00353395	0.00704023	0.608554	0.916396	0.573974	0.995105
Bacteria.Firmicutes.Bacilli.Bacillales.Staphylococcaceae.Staphylococcus.b8fbbac61da44163a0de008ceb579d63	0.000573215	0.000117938	0.0543368	0.725647	0.803133	0.995105
Bacteria.Proteobacteria.Deltaproteobacteria.Myxococcales.Nannocystaceae.Nannocystis.9234522eca5135f6e38883b97214afdc	0	0.00108089	0.0310878	-0.0101229	0.997266	0.997266
Bacteria.Bacteroidetes.Bacteroidia.Bacteroidales.[Barnesiellaceae].Barnesiella.6e60869ede1a8f908ad99c703a75a5fa	0.000586953	0.000981803	0.0906179	0.0168322	0.995204	0.997266
Bacteria.Firmicutes.Bacilli.Lactobacillales.Aerococcaceae.Abiotrophia.4bf54a44bb85f2739e3520ace97b4eae	0.00220599	0.00353694	0.370199	0.0161595	0.993869	0.997266

## Sheet: 2_16S_taxa_all_patients_oL2_vs_
Taxa	Abundance in oL4	Abundance in oL2	baseMean	Log fold-change	p-value	Adj. p-val
Bacteria.Actinobacteria.Actinobacteria.Actinomycetales.Mycobacteriaceae.Mycobacterium.403432032a5dcac89b8cb1610988f69e	0.865617	0.0777402	171.744	5.64066	3.35e-13	4.92e-11
Bacteria.Actinobacteria.Actinobacteria.Actinomycetales.Corynebacteriaceae.Corynebacterium.8a82820cc1075421faf42ec4285f23b3	0.00655966	0.135815	15.1685	-3.00153	1.64e-05	0.0012043
Bacteria.Proteobacteria.Epsilonproteobacteria.Campylobacterales.Campylobacteraceae.Campylobacter.77c8670a541db06cfb2e0bf0a21bcf4b	0.00029036	0.00280689	0.464887	-0.666414	0.780517	0.996486
Bacteria.Proteobacteria.Gammaproteobacteria.Chromatiales.Halothiobacillaceae.Thiofaba.acd996faade392f99f28bc503e9c347b	0	0.000136911	0.0132332	0.534454	0.864504	0.996486
Bacteria.Proteobacteria.Gammaproteobacteria.Oceanospirillales.Oceanospirillaceae.Marinomonas.49dbc423c4a7da144b5eeb37d9d05733	0	0.00322113	0.25134	-0.824242	0.783655	0.996486
Bacteria.Proteobacteria.Gammaproteobacteria.Enterobacteriales.Enterobacteriaceae.Pseudomonas.f2b99a001673871809b58e7c9c61856a	0.00034382	0.000547645	0.104269	0.613124	0.844774	0.996486
Bacteria.Proteobacteria.Gammaproteobacteria.Pseudomonadales.Pseudomonadaceae.Pseudomonas.6af10ea5c29e3cb23de0f460c78a2163	0.00604691	0.0173321	1.81399	-0.917309	0.504254	0.996486
Bacteria.Proteobacteria.Gammaproteobacteria.Legionellales.Legionellaceae.Legionella.fce1f65d85af55a5c8d369cdb65ecc78	0	0.00104665	0.102855	0.0963754	0.975449	0.996486
Bacteria.Proteobacteria.Gammaproteobacteria.Oceanospirillales.Halomonadaceae.Chromohalobacter.fe0abdc6399b94cd758eaf2ddd91e35e	0	0.00138206	0.131747	-0.0671419	0.982893	0.996486
Bacteria.Proteobacteria.Gammaproteobacteria.Oceanospirillales.Halomonadaceae.Halomonas.4eed1d9d91f28343e0c44bc2bd71c05a	0.00327439	0.00250775	0.879966	1.55106	0.440207	0.996486
Bacteria.Proteobacteria.Gammaproteobacteria.Xanthomonadales.Xanthomonadaceae.Lysobacter.27fdb3135177b018c55fe0748950ccf1	0	0.00228275	0.206067	-0.622676	0.824494	0.996486
Bacteria.Proteobacteria.Gammaproteobacteria.Xanthomonadales.Xanthomonadaceae.Pseudoxanthomonas.406419ab9947ee844a9bf617338ca05b	0	0.00147727	0.138578	-0.324111	0.917546	0.996486
Bacteria.Proteobacteria.Gammaproteobacteria.Xanthomonadales.Xanthomonadaceae.Xanthomonas.6e7bfd8302488122ab735f8b1638aac3	0.001287	0	0.0486321	1.26278	0.686632	0.996486
Bacteria.Proteobacteria.Gammaproteobacteria.Xanthomonadales.Xanthomonadaceae.Achromobacter.1dfad3e87026bec25ad21b02370ba6ff	0	0.000614251	0.0660116	0.248986	0.936632	0.996486
Bacteria.Proteobacteria.Gammaproteobacteria.Pseudomonadales.Moraxellaceae.Acinetobacter.f3b178d47f09d2c2fc4e2d211747bfe8	0.00440678	0.0475558	3.84074	-1.5243	0.194369	0.996486
Bacteria.Proteobacteria.Gammaproteobacteria.Enterobacteriales.Enterobacteriaceae.Profftia.a814875688548c36d94578ca42ae3e41	0	0.000182548	0.0179355	0.465842	0.88176	0.996486
Bacteria.Proteobacteria.Gammaproteobacteria.Pseudomonadales.Moraxellaceae.Alkanindiges.6d19033aef0842ecf59f26bc18cd3b7a	0.00502495	0.00240566	0.473289	1.74481	0.395733	0.996486
Bacteria.Proteobacteria.Gammaproteobacteria.Enterobacteriales.Enterobacteriaceae.Pantoea.5a90106a71eb6b7dd8fae5fb1b8967c8	0.00922056	0.00808309	0.287428	0.229307	0.927882	0.996486
Bacteria.Proteobacteria.Gammaproteobacteria.Enterobacteriales.Enterobacteriaceae.Budvicia.f309ea1ec8287026c5e76ba862929f85	0.000143431	0.00153563	0.198013	-0.0137883	0.996486	0.996486
Bacteria.Proteobacteria.Gammaproteobacteria.Enterobacteriales.Enterobacteriaceae.Proteus.ff879f5418ebe06779501b57b52cb944	0.000277662	0.010726	0.262432	-0.585571	0.851542	0.996486
Bacteria.Proteobacteria.Gammaproteobacteria.Aeromonadales.Aeromonadaceae.Aeromonas.6570e98f6d39bacffe712be49da85a72	0.000955566	0.00419785	0.451682	-0.225565	0.920577	0.996486
Bacteria.Proteobacteria.Gammaproteobacteria.Alteromonadales.[Chromatiaceae].Rheinheimera.208aa356da260d9027f7dfc6b49af54d	0.000905305	0.00186708	0.283928	0.300849	0.912821	0.996486
Bacteria.Proteobacteria.Gammaproteobacteria.Pasteurellales.Pasteurellaceae.Bibersteinia.47721d1f56a0b9265e964921aa2248fb	0.000408747	0	0.0503643	0.891756	0.775833	0.996486
Bacteria.Proteobacteria.Gammaproteobacteria.Pasteurellales.Pasteurellaceae.Actinobacillus.1f49a099a6d886e26ffc43d09e9a8baa	0	0.00665747	0.0502634	0.465842	0.88176	0.996486
Bacteria.Proteobacteria.Gammaproteobacteria.Pasteurellales.Pasteurellaceae.Mannheimia.26e5e0fa319e12161f3374cb4ad84de4	0	0.000679876	0.0527097	0.0963754	0.975449	0.996486
Bacteria.Proteobacteria.Gammaproteobacteria.Pseudomonadales.Moraxellaceae.Psychrobacter.25b7ea1bc3435d8c82c08fbc2bba87ac	0	0.00522198	0.373839	-1.36203	0.647523	0.996486
Bacteria.Proteobacteria.Gammaproteobacteria.Pseudomonadales.Moraxellaceae.Enhydrobacter.04a75f1199d1bc6b58d19dd8aeb24520	0.00522328	0.0412954	4.46806	-1.7234	0.0972862	0.996486
Bacteria.Proteobacteria.Gammaproteobacteria.Xanthomonadales.Sinobacteraceae.Hydrocarboniphaga.30193596fa89c079c7ef27a313f0cfa2	0.00194932	0	0.0636402	1.4112	0.65202	0.996486
Bacteria.Proteobacteria.Betaproteobacteria.Burkholderiales.Oxalobacteraceae.Massilia.bad0c851088d436414a7f01b1aae88ef	0.00208247	0.00269769	0.17907	-0.63441	0.836543	0.996486
Bacteria.Proteobacteria.Betaproteobacteria.Burkholderiales.Oxalobacteraceae.Naxibacter.09a0f08c867a618fe1f41d44c5309916	0	0.000452735	0.0339173	0.248986	0.936632	0.996486
Bacteria.Proteobacteria.Betaproteobacteria.Rhodocyclales.Rhodocyclaceae.Denitromonas.d09cb5e8fc79f6c36c5e04949eea91ea	0	0.000726443	0.0643234	0.0963754	0.975449	0.996486
Bacteria.Proteobacteria.Betaproteobacteria.Rhodocyclales.Rhodocyclaceae.Azospira.d8533dcba65d402ae5ab3e013606cded	0	0.00194153	0.120265	-0.376603	0.904248	0.996486
Bacteria.Proteobacteria.Betaproteobacteria.Neisseriales.Neisseriaceae.Neisseria.4ef3d05269c762db631f033432d48b23	0.00320793	0.0031937	0.767301	1.16937	0.587388	0.996486
Bacteria.Proteobacteria.Betaproteobacteria.Burkholderiales.Comamonadaceae.Pseudorhodoferax.c91780e779a75eaa398741394070e0cb	0.0015444	0	0.0583585	1.35977	0.663939	0.996486
Bacteria.Proteobacteria.Betaproteobacteria.Burkholderiales.Comamonadaceae.Acidovorax.e9f66c7d13ad28d7220fb8754c6512f2	0	0.000775577	0.0792558	0.173358	0.955854	0.996486
Bacteria.Proteobacteria.Betaproteobacteria.Burkholderiales.Oxalobacteraceae.Pseudoburkholderia.dc8a2f47b3d1dc2e1f5f805891976b29	0.0022929	0	0.286777	2.6771	0.390858	0.996486
Bacteria.Proteobacteria.Betaproteobacteria.Burkholderiales.Comamonadaceae.Caldimonas.8ca1f16071d6ec4063c35f053fad7c87	0	0.00169046	0.106472	-0.0671419	0.982893	0.996486
Bacteria.Proteobacteria.Betaproteobacteria.Burkholderiales.Alcaligenaceae.Bordetella.6e1ee4ac952c619b04c1871f5497b94f	0	0.00190557	0.162919	-0.241758	0.936972	0.996486
Bacteria.Proteobacteria.Betaproteobacteria.Burkholderiales.Alcaligenaceae.Oligella.835f4386310acf7009fb699aa32f16cc	0	0.000522466	0.0535499	0.323135	0.917822	0.996486
Bacteria.Proteobacteria.Deltaproteobacteria.Myxococcales.Nannocystaceae.Nannocystis.9234522eca5135f6e38883b97214afdc	0	0.0014985	0.0517719	0.0712309	0.981853	0.996486
Bacteria.Proteobacteria.Deltaproteobacteria.Desulfovibrionales.Desulfomicrobiaceae.Desulfomicrobium.383ac7d70fbd66f6b03dbc0c8b97bbfc	0.00103146	0	0.154009	1.64107	0.599854	0.996486
Bacteria.Proteobacteria.Deltaproteobacteria.Desulfovibrionales.Desulfovibrionaceae.Desulfovibrio.ac3b781d52eacd79478a39274e4e6d21	0	0.00973181	0.105785	-0.289585	0.926305	0.996486
Bacteria.Proteobacteria.Alphaproteobacteria.Sphingomonadales.Sphingomonadaceae.Sphingomonas.59609ec055fcb073adc46793719455e4	0.00139815	0.00635892	0.528645	0.0108287	0.996432	0.996486
Bacteria.Proteobacteria.Alphaproteobacteria.Sphingomonadales.Sphingomonadaceae.Sphingobium.da8dbb9356ed5e68256a9c9ec39bdbdc	0	0.00326207	0.233131	-0.724779	0.762573	0.996486
Bacteria.Proteobacteria.Alphaproteobacteria.Sphingomonadales.Sphingomonadaceae.Novosphingobium.26c00973f4b4282b5aad0db9a88f299e	0	0.00244682	0.259742	-0.707068	0.798266	0.996486
Bacteria.Proteobacteria.Alphaproteobacteria.Caulobacterales.Caulobacteraceae.Brevundimonas.4bb96d7ec191f9f114463f425bca5f72	0.000398486	0.00538349	0.367911	-0.929313	0.69917	0.996486
Bacteria.Proteobacteria.Alphaproteobacteria.Rhizobiales.Methylobacteriaceae.Methylobacterium.13ef39327a9a40ce5f44f8b27db52c7c	0.00465069	0.0215757	2.45629	-1.81565	0.196456	0.996486
Bacteria.Proteobacteria.Alphaproteobacteria.Rhizobiales.Beijerinckiaceae.Salinarimonas.552a42fe946bd10def04d32af880b42c	0.000433791	0.0049007	0.543383	-1.08943	0.672836	0.996486
Bacteria.Proteobacteria.Alphaproteobacteria.Rhodobacterales.Rhodobacteraceae.Haematobacter.63f023ad464aa1abe0c45ecb0b9fdc37	0.00014518	0.00237924	0.359466	-0.565845	0.847437	0.996486
Bacteria.Proteobacteria.Alphaproteobacteria.Rhizobiales.Bartonellaceae.Bartonella.63d89a9abb11b1d958a294837ef73e74	0.000267523	0.0220924	0.0335766	0.891756	0.775833	0.996486
Bacteria.Proteobacteria.Alphaproteobacteria.Rhizobiales.Rhizobiaceae.Rhizobium.d201ef05844489782f0eebffc3f14194	0.00551498	0.0415746	3.48179	-3.31743	0.115632	0.996486
Bacteria.Proteobacteria.Alphaproteobacteria.Rhizobiales.Methylocystaceae.Pleomorphomonas.bd0420d0a56d9afa882a42acdffe50b1	0	0.000273823	0.0264665	0.465842	0.88176	0.996486
Bacteria.Proteobacteria.Alphaproteobacteria.Rhodospirillales.Acetobacteraceae.Roseomonas.2ef96f4d19cfd273e3494f6b373fae32	0.000204374	0	0.0251822	0.741876	0.812754	0.996486
Bacteria.Proteobacteria.Alphaproteobacteria.Rhodospirillales.Rhodospirillaceae.Enhydrobacter.f07c81418a12fac9b50ea54caded9841	0	0.000622665	0.0345146	0.323135	0.917822	0.996486
Bacteria.Fusobacteria.Fusobacteriia.Fusobacteriales.Leptotrichiaceae.Streptobacillus.0d2daf82e641596d20fed7336278f7ab	0	0.000184026	0.0503643	0.465842	0.88176	0.996486
Bacteria.Bacteroidetes.Sphingobacteriia.Sphingobacteriales.Sphingobacteriaceae.Pedobacter.0e8209d368832bd8ba51e902c0ae75cb	0	0.00147529	0.0988807	-0.248186	0.936818	0.996486
Bacteria.Bacteroidetes.[Saprospirae].[Saprospirales].Chitinophagaceae.Terrimonas.323fc0a5a127cdc83d9171a27b93156b	0.00034382	0.000410734	0.091036	0.686028	0.826598	0.996486
Bacteria.Bacteroidetes.[Saprospirae].[Saprospirales].Chitinophagaceae.Trachelomonas.45f7d0ac026b17dd3ebcbc7c30dd5f5d	0	0.000960307	0.0515433	0.0755567	0.980751	0.996486
Bacteria.Bacteroidetes.[Saprospirae].[Saprospirales].Chitinophagaceae.Ferruginibacter.133ed11d20137bb87a99f9fb3d1aad51	0	0.000575053	0.0972166	0.323135	0.917822	0.996486
Bacteria.Bacteroidetes.Bacteroidia.Bacteroidales.Rikenellaceae.Alistipes.98be5346ef1749fd281504e99abf8548	0.000613121	0.001401	0.153204	0.386913	0.901634	0.996486
Bacteria.Bacteroidetes.Bacteroidia.Bacteroidales.Porphyromonadaceae.Petrimonas.5bcabcb76434efbb4a07c905e9f8c947	0	0.000547645	0.052933	0.323135	0.917822	0.996486
Bacteria.Bacteroidetes.Bacteroidia.Bacteroidales.Porphyromonadaceae.Vestibaculum.e7f570372730567b27a0f790f81e24d0	0.00014518	0	0.0235028	0.741876	0.812754	0.996486
Bacteria.Bacteroidetes.Bacteroidia.Bacteroidales.Porphyromonadaceae.Macellibacteroides.b7972cec4a1f081c7dd2bb2e87160853	0.00127409	0	0.140833	1.95273	0.532231	0.996486
Bacteria.Bacteroidetes.Bacteroidia.Bacteroidales.[Barnesiellaceae].Barnesiella.6e60869ede1a8f908ad99c703a75a5fa	0	0.000819001	0.0441263	0.13632	0.965279	0.996486
Bacteria.Bacteroidetes.Bacteroidia.Bacteroidales.Prevotellaceae.Prevotella.6c91b03edc155703d03eca97c5a2597b	0.0145464	0.0676183	7.85043	-1.07784	0.26846	0.996486
Bacteria.Bacteroidetes.Bacteroidia.Bacteroidales.Marinilabiaceae.Cytophaga.08e5996d843b3203b06163edc542cdef	0	0.00534011	0.56916	-1.84926	0.444395	0.996486
Bacteria.Bacteroidetes.Bacteroidia.Bacteroidales.Bacteroidaceae.Bacteroides.eae0738ba858df2d22433de0913bc58c	0.00143062	0.010223	0.643711	-0.378071	0.868025	0.996486
Bacteria.Bacteroidetes.Flavobacteriia.Flavobacteriales.Flavobacteriaceae.Flavobacterium.e10f05534a632d6a0f8e7f1c0919e8eb	0	0.00194513	0.1048	-0.290496	0.926074	0.996486
Bacteria.Bacteroidetes.Flavobacteriia.Flavobacteriales.[Weeksellaceae].Weeksella.6bbbc5eb701e9cccf8a563933617d363	0.000131182	0	0.0498301	0.741876	0.812754	0.996486
Bacteria.Bacteroidetes.Flavobacteriia.Flavobacteriales.[Weeksellaceae].Wautersiella.624c60c2a2416f4f428b84f9588f337d	0	0.00262121	0.189038	-0.594244	0.819103	0.996486
Bacteria.Bacteroidetes.Flavobacteriia.Flavobacteriales.[Weeksellaceae].Elizabethkingia.a68f1205d4074f8928125564ed7681d2	0.00565804	0.0301931	3.18707	-1.42923	0.315463	0.996486
Bacteria.Bacteroidetes.Flavobacteriia.Flavobacteriales.[Weeksellaceae].Bergeyella.bcdaa03ad79c6570ef429a94952175ca	0	0.00410411	0.167824	-0.582837	0.852283	0.996486
Bacteria.[Thermi].Deinococci.Deinococcales.Trueperaceae.Truepera.bf991db3249937049e80d12840efa7dc	0	0.000622665	0.0551344	0.173358	0.955854	0.996486
Bacteria.Firmicutes.Clostridia.Clostridiales.[Tissierellaceae].Finegoldia.8dc4520cb0b6df47a8b7d0832a252cb0	0.00119638	0.0290566	2.7067	-2.69008	0.105439	0.996486
Bacteria.Firmicutes.Clostridia.Clostridiales.[Tissierellaceae].Peptoniphilus.244197657e8c6f47a0b10a5ec21b4ee2	0.000753466	0.024975	2.46813	-3.01627	0.0768515	0.996486
Bacteria.Firmicutes.Clostridia.Clostridiales.[Tissierellaceae].WAL_1855D.d9edfe40997a6da1040fecb878feb158	0	0.00142593	0.0214726	0.534454	0.864504	0.996486
Bacteria.Firmicutes.Clostridia.Clostridiales.[Tissierellaceae].1-68.e69dfc6e24c99c0e6d29bb3cdcff01da	0	0.000344353	0.0255265	0.534454	0.864504	0.996486
Bacteria.Firmicutes.Clostridia.Clostridiales.Peptostreptococcaceae.[Clostridium].1a0b1855c9f3ea22a57f898b23e3de48	0.000798085	0.000123518	0.0681249	1.22532	0.69544	0.996486
Bacteria.Firmicutes.Clostridia.Clostridiales.Clostridiaceae.Clostridium.bf724e4d31a620d070cf4d7dde605181	0.000817494	0	0.100729	1.24156	0.691635	0.996486
Bacteria.Firmicutes.Clostridia.Clostridiales.Lachnospiraceae.Roseburia.004ca9d14962355f711fea88ca840425	0	0.000408304	0.0484389	0.396039	0.899374	0.996486
Bacteria.Firmicutes.Clostridia.Clostridiales.Lachnospiraceae.Bacteroides.b3dbccceff0f44f865957eb9ff5fecb9	0	0.000800256	0.0711178	0.248986	0.936632	0.996486
Bacteria.Firmicutes.Clostridia.Clostridiales.Lachnospiraceae.Butyrivibrio.3d0a443b28cb55ee49afc9943974489a	0.00102187	0.00244534	0.232284	0.536986	0.863696	0.996486
Bacteria.Firmicutes.Clostridia.Clostridiales.Lachnospiraceae.Moryella.f2eb2a64d406256d613e235411b49b5e	0	0.000368053	0.100729	0.323135	0.917822	0.996486
Bacteria.Firmicutes.Clostridia.Clostridiales.Lachnospiraceae.Clostridium.853bc0df4f511a52189a133d996cd9fb	0.00060799	0.00233682	0.335401	-0.50384	0.855343	0.996486
Bacteria.Firmicutes.Clostridia.Clostridiales.Lachnospiraceae.Ruminococcus.81fb9360f5e5db4f7d99b5f099c691bf	0	0.00242667	0.262481	-0.982059	0.743767	0.996486
Bacteria.Firmicutes.Clostridia.Clostridiales.Lachnospiraceae.Dorea.63dd3986b722a781191c5053e5b46443	0.000408747	0.00268998	0.315869	-0.706679	0.813162	0.996486
Bacteria.Tenericutes.Mollicutes.Mycoplasmatales.Mycoplasmataceae.Ureaplasma.392d582808b9f2a7f10a8cb6caa81a99	0	9.2e-05	0.0444254	0.534454	0.864504	0.996486
Bacteria.Firmicutes.Clostridia.Clostridiales.Ruminococcaceae.Ethanoligenens.49604f52e41c084476c1e4f2574206dd	0	0.00109529	0.105866	0.0168701	0.995702	0.996486
Bacteria.Firmicutes.Clostridia.Clostridiales.Ruminococcaceae.Gemmiger.5a6289b8068d8b7722dafb10cc3d0b76	0	0.000835646	0.0955639	0.173358	0.955854	0.996486
Bacteria.Firmicutes.Clostridia.Clostridiales.Ruminococcaceae.Faecalibacterium.b167ad9fdf6c2158e6e90d7756049242	0	0.00511142	0.385536	-1.35036	0.598771	0.996486
Archaea.Euryarchaeota.Methanobacteria.Methanobacteriales.Methanobacteriaceae.Methanobrevibacter.494e7cb040a86bd3d91e7066a86d06d0	0	0.00135281	0.134831	-0.153897	0.960799	0.996486
Archaea.Crenarchaeota.Thaumarchaeota.Nitrososphaerales.Nitrososphaeraceae.Candidatus.Nitrososphaera.fbc0404eaec68e07cb9d7a0945a37961	0	0.00128041	0.0687244	-0.0553208	0.985905	0.996486
Bacteria.Cyanobacteria.Oscillatoriophycideae.Oscillatoriales.Phormidiaceae.Arthrospira.330b2967113c7906096404aafd0b391d	0	0.000320102	0.0284471	0.465842	0.88176	0.996486
Bacteria.Cyanobacteria.Nostocophycideae.Nostocales.Scytonemataceae.Brasilonema.2f2a9e29fe8b3a00cd0f385641035be4	0	0.000270563	0.0269663	0.465842	0.88176	0.996486
Bacteria.Cyanobacteria.Oscillatoriophycideae.Chroococcales.Xenococcaceae.Chroococcidiopsis.a5c805d36f3bc83b77255f4483e66891	0	0.00157707	0.120665	-0.153897	0.960799	0.996486
Bacteria.Firmicutes.Clostridia.Clostridiales.Veillonellaceae.Selenomonas.8296bb5a87fed6f75327fb4a31fd3ac9	0.000584283	6.57e-05	0.0875468	1.17425	0.70756	0.996486
Bacteria.Firmicutes.Clostridia.Clostridiales.Veillonellaceae.Mitsuokella.b1e26d0956676effc6f659d132ed4dff	0	0.00108225	0.107865	0.0168701	0.995702	0.996486
Bacteria.Firmicutes.Clostridia.Clostridiales.Veillonellaceae.Anaerosinus.5c76bdf5d4af155634aae61fcd866804	0.0035192	0.0252372	2.10834	-1.32756	0.4344	0.996486
Bacteria.Firmicutes.Clostridia.Clostridiales.Veillonellaceae.Succinispira.65654770a942b3ed73ed3001ce78e695	0	0.000541126	0.0539326	0.323135	0.917822	0.996486
Bacteria.Firmicutes.Erysipelotrichi.Erysipelotrichales.Erysipelotrichaceae.[Eubacterium].78a5b220c399011a5a72ce2755fc54ac	0	0.000184026	0.0503643	0.465842	0.88176	0.996486
Bacteria.Synergistetes.Synergistia.Synergistales.Dethiosulfovibrionaceae.Pyramidobacter.0759b6ce159628127fb1e1ec1822d4ca	0	0.00212288	0.0733436	-0.0914255	0.976707	0.996486
Bacteria.Actinobacteria.Coriobacteriia.Coriobacteriales.Coriobacteriaceae.Atopobium.bba6da0e81f92e0b2af4e957cd69f42e	0	0.000988142	0.127365	0.173358	0.955854	0.996486
Bacteria.Actinobacteria.Coriobacteriia.Coriobacteriales.Coriobacteriaceae.Collinsella.24a243c38014e2daa1fadd8c23ec578f	0	0.00120456	0.0787382	0.0168704	0.995701	0.996486
Bacteria.Actinobacteria.Acidimicrobiia.Acidimicrobiales.C111.Ilumatobacter.dc11664bc5502bf01944fb43b8f929b0	0	0.000742911	0.103048	0.173358	0.955854	0.996486
Bacteria.Actinobacteria.Actinobacteria.Actinomycetales.Propionibacteriaceae.Propionibacterium.355c3240c6a55a96ef70dd3701c96392	0	0.00264432	0.10473	0.173528	0.952903	0.996486
Bacteria.Actinobacteria.Actinobacteria.Actinomycetales.Nocardioidaceae.Nocardioides.5300c6e239421019813096892de65771	0.000477783	0.00596193	0.59014	-1.29538	0.519029	0.996486
Bacteria.Actinobacteria.Actinobacteria.Actinomycetales.Streptomycetaceae.Streptomyces.e077f7faf48e5aad47b13af6835db552	0	0.0021645	0.137311	-0.46281	0.882465	0.996486
Bacteria.Actinobacteria.Actinobacteria.Actinomycetales.Frankiaceae.Actinomycetales.9b40d34ef71f7d9d56ca7891e3f4e043	0	9.13e-05	0.00896772	0.534454	0.864504	0.996486
Bacteria.Actinobacteria.Actinobacteria.Actinomycetales.Pseudonocardiaceae.Actinomycetospora.27f376998de656748ddcd9f94a51345a	0.000133761	0.00117515	0.175116	-0.0209394	0.994495	0.996486
Bacteria.Actinobacteria.Actinobacteria.Actinomycetales.Intrasporangiaceae.Ornithinimicrobium.344e109b5b66dbf4e55e21052b3afc85	0	0.00463939	0.316712	-1.11273	0.68796	0.996486
Bacteria.Actinobacteria.Actinobacteria.Actinomycetales.Micrococcaceae.Rothia.a38d5871c6a2558a5483e235b81ccea7	0.000805161	0.000247036	0.0999753	1.05378	0.736399	0.996486
Bacteria.Actinobacteria.Actinobacteria.Actinomycetales.Micrococcaceae.Kocuria.e783488708509f26ddc8c0f8bc697020	0.00638502	0.0266436	2.84823	-0.529107	0.598635	0.996486
Bacteria.Actinobacteria.Actinobacteria.Actinomycetales.Micrococcaceae.Micrococcus.ef366129b50b5ea424db24e708a75ba3	0	0.0137651	0.312974	-1.06205	0.658076	0.996486
Bacteria.Actinobacteria.Actinobacteria.Actinomycetales.Micrococcaceae.Arthrobacter.6b780e361cfc5f06def718518324bdcb	0.00190937	0.00678183	0.752912	-0.884441	0.59618	0.996486
Bacteria.Actinobacteria.Actinobacteria.Actinomycetales.Microbacteriaceae.Leifsonia.009c0490f447bd0906ccd1112dfc0e41	0.000398486	0.00342278	0.039936	0.891756	0.775833	0.996486
Bacteria.Actinobacteria.Actinobacteria.Actinomycetales.Microbacteriaceae.Frondihabitans.d43ffdef0c9753d5a1b3aa9ca9edfcf3	0	0.000212404	0.027708	0.534454	0.864504	0.996486
Bacteria.Actinobacteria.Actinobacteria.Actinomycetales.Actinomycetaceae.Varibaculum.f8e68b40daeefc9c78cea2012d7da4eb	0	0.000678098	0.117398	0.173358	0.955854	0.996486
Bacteria.Actinobacteria.Actinobacteria.Actinomycetales.Actinomycetaceae.Actinomyces.9c1454b23d7b9e86ad391e0b238ee420	0.00029036	0.017661	0.848896	-2.02795	0.286421	0.996486
Bacteria.Actinobacteria.Actinobacteria.Bifidobacteriales.Bifidobacteriaceae.Gardnerella.25d1232b636c9951b58814d31052467f	0	0.00218504	0.250023	-0.66695	0.823198	0.996486
Bacteria.Actinobacteria.Actinobacteria.Bifidobacteriales.Bifidobacteriaceae.Bifidobacterium.8d29a4b0e2aa4632d98d3b302ea9ef31	0.00278474	9.13e-05	0.0998822	1.56865	0.616049	0.996486
Bacteria.Actinobacteria.Actinobacteria.Actinomycetales.Brevibacteriaceae.Brevibacterium.fde5540f3a06738d19a24a009ffbe803	0	0.00216237	0.369964	-0.747093	0.769359	0.996486
Bacteria.Actinobacteria.Actinobacteria.Actinomycetales.Geodermatophilaceae.Blastococcus.fad7959733a200344fe5a2a9f6252f81	0.000613121	0.00425126	0.36462	-0.495528	0.81176	0.996486
Bacteria.Actinobacteria.Actinobacteria.Actinomycetales.Dietziaceae.Dietzia.611f22c4148835b3347e113a625e4b3f	0.00143513	0.0154672	1.30383	-1.60911	0.32795	0.996486
Bacteria.Actinobacteria.Actinobacteria.Actinomycetales.Nocardiaceae.Rhodococcus.cfe98556a6250bcf6e8e6a65edc2cdee	0	0.000101461	0.0077462	0.534454	0.864504	0.996486
Bacteria.Actinobacteria.Actinobacteria.Actinomycetales.Gordoniaceae.Millisia.0eec78dd11e070d018fcebdf77e068f7	0	0.00171076	0.119307	-0.241972	0.938397	0.996486
Bacteria.Actinobacteria.Actinobacteria.Actinomycetales.Nakamurellaceae.Nakamurella.b4a03c84c369c0f8f4f304bd52ce07b1	0	0.00094697	0.094382	0.0963754	0.975449	0.996486
Bacteria.Actinobacteria.Thermoleophilia.Solirubrobacterales.Solirubrobacteraceae.Solirubrobacter.7dac736348fa1e66320dc4269fdcb80b	0.00127932	0.00265565	0.125267	1.34841	0.666502	0.996486
Bacteria.Actinobacteria.Thermoleophilia.Gaiellales.Gaiellaceae.Gaiella.605690a8bfc31341b7529447072b94f4	0	0.000697212	0.0680329	0.396039	0.899374	0.996486
Bacteria.Planctomycetes.Planctomycetia.Gemmatales.Isosphaeraceae.Nostocoida.3df1358918971223e96ba36eaf1ed8f3	0	0.000370553	0.0502753	0.396039	0.899374	0.996486
Bacteria.Firmicutes.Bacilli.Bacillales.Paenibacillaceae.Paenibacillus.aa3537df624513208d209d3f6cb35b02	0	9.2e-05	0.0251822	0.534454	0.864504	0.996486
Bacteria.Firmicutes.Bacilli.Bacillales.Planococcaceae.Bacillus.6d350e1fecb972294579217f2a162e80	0.00017191	0	0.0256681	0.741876	0.812754	0.996486
Bacteria.Firmicutes.Bacilli.Bacillales.Listeriaceae.Brochothrix.ecfe86307ef82349547adb9ca8c879df	0	0.0105808	0.429946	-1.42209	0.57755	0.996486
Bacteria.Firmicutes.Bacilli.Bacillales.Bacillaceae.Marinococcus.a0f15be3bc15acedc9fb2f5909896cc8	0	9.13e-05	0.00896772	0.534454	0.864504	0.996486
Bacteria.Firmicutes.Bacilli.Bacillales.Planococcaceae.Kurthia.c740f718c86d6e26b1435cabd580ffd7	0.000955566	0	0.105624	1.64107	0.599854	0.996486
Bacteria.Firmicutes.Bacilli.Bacillales.Bacillaceae.Bacillus.41cd0a24a556826fddad482e7007476e	0.000772959	0.00159107	0.185543	0.353471	0.884444	0.996486
Bacteria.Firmicutes.Bacilli.Lactobacillales.Aerococcaceae.Alloiococcus.fdb77967f908752412f454de1ff74bbf	0	0.00382804	0.136518	-0.153897	0.960799	0.996486
Bacteria.Firmicutes.Bacilli.Lactobacillales.Aerococcaceae.Abiotrophia.4bf54a44bb85f2739e3520ace97b4eae	0	0.00484929	0.354402	-1.30411	0.585829	0.996486
Bacteria.Firmicutes.Bacilli.Lactobacillales.Streptococcaceae.Streptococcus.d3d16f870dfadf956370c3aba43e4098	0.00889382	0.0753627	9.55847	-1.84296	0.0243019	0.996486
Bacteria.Firmicutes.Bacilli.Lactobacillales.Aerococcaceae.Lacticigenium.9a79aa9fa61c27c45863d70e5de6d2ba	0	0.00564738	0.0255265	0.534454	0.864504	0.996486
Bacteria.Firmicutes.Bacilli.Lactobacillales.Carnobacteriaceae.Isobaculum.13e52764e1c08c4fd9902769bf9e022e	0	9.2e-05	0.0444254	0.534454	0.864504	0.996486
Bacteria.Firmicutes.Bacilli.Lactobacillales.Leuconostocaceae.Weissella.620edd2956ede81b09704c3f3f5657fa	0.00034382	0.00260194	0.283238	-0.394513	0.877019	0.996486
Bacteria.Firmicutes.Bacilli.Lactobacillales.Leuconostocaceae.Oenococcus.e16be6de6436803e3b84a5b5a648bb17	0	0.0003885	0.0301198	0.323135	0.917822	0.996486
Bacteria.Firmicutes.Bacilli.Lactobacillales.Lactobacillaceae.Pediococcus.21c47ce7835c803aede78d5bf66c8791	0	0.000499677	0.10298	0.248986	0.936632	0.996486
Bacteria.Firmicutes.Bacilli.Lactobacillales.Lactobacillaceae.Lactobacillus.6658f31f4b3defccbc037636b27672e0	0.0026074	0.000597244	0.222727	1.56359	0.508278	0.996486
Bacteria.Firmicutes.Bacilli.Bacillales.Planococcaceae.Staphylococcus.ed731f07a20332ea13fc88a1752b45ed	0.00058072	0.007706	0.534785	-0.904484	0.725705	0.996486
Bacteria.Firmicutes.Bacilli.Bacillales.Staphylococcaceae.Macrococcus.a526773529340733ee569a2ad8574e97	0.000204374	0.0059019	0.720054	-1.9361	0.338859	0.996486
Bacteria.Firmicutes.Bacilli.Bacillales.Staphylococcaceae.Staphylococcus.b8fbbac61da44163a0de008ceb579d63	0	0.000757576	0.0410778	0.465842	0.88176	0.996486

## Sheet: 3_16S_taxa_all_patients_oL3_vs_
Taxa	Abundance in oL4	Abundance in oL3	baseMean	Log fold-change	p-value	Adj. p-val
Bacteria.Actinobacteria.Actinobacteria.Actinomycetales.Mycobacteriaceae.Mycobacterium.403432032a5dcac89b8cb1610988f69e	0.865617	0.0154024	233.795	7.43382	1.25e-14	1.41e-12
Bacteria.Bacteroidetes.Bacteroidia.Bacteroidales.Prevotellaceae.Prevotella.215b1989c35d7fc6ff6194244744d7fd	0.0145464	0.370611	32.1494	-3.81086	0.000163628	0.00924501
Bacteria.Actinobacteria.Actinobacteria.Actinomycetales.Corynebacteriaceae.Corynebacterium.8a82820cc1075421faf42ec4285f23b3	0.00655966	0.0915588	9.16205	-2.64965	0.00698229	0.262999
Bacteria.Bacteroidetes.Bacteroidia.Bacteroidales.Porphyromonadaceae.Porphyromonas.9e06ff8f82499e1f457e55e8a7157d0d	0	0.0274564	1.75154	-3.92262	0.0232976	0.658157
Bacteria.Proteobacteria.Epsilonproteobacteria.Campylobacterales.Campylobacteraceae.Campylobacter.14a597495c9c251d0a3bd884e90977db	0.00029036	0.00644163	0.445876	-1.35155	0.607672	0.991796
Bacteria.Proteobacteria.Gammaproteobacteria.Pseudomonadales.Pseudomonadaceae.Pseudomonas.4e251742b2e231c82ea873aaaa212263	0.00604691	0.00665986	0.934179	0.245445	0.89996	0.991796
Bacteria.Proteobacteria.Gammaproteobacteria.Enterobacteriales.Enterobacteriaceae.Pseudomonas.f2b99a001673871809b58e7c9c61856a	0.00034382	0.00181752	0.174512	0.150021	0.959462	0.991796
Bacteria.Proteobacteria.Gammaproteobacteria.Oceanospirillales.Halomonadaceae.Halomonas.4eed1d9d91f28343e0c44bc2bd71c05a	0.00327439	0.0162258	1.14101	0.754865	0.734482	0.991796
Bacteria.Proteobacteria.Gammaproteobacteria.Xanthomonadales.Xanthomonadaceae.Lysobacter.095a333cd4ed6c7a2410d74af373bc11	0	0.00658362	0.0897716	0.174736	0.952799	0.991796
Bacteria.Proteobacteria.Gammaproteobacteria.Xanthomonadales.Xanthomonadaceae.Xanthomonas.6e7bfd8302488122ab735f8b1638aac3	0.001287	0	0.0921703	1.37182	0.642035	0.991796
Bacteria.Proteobacteria.Gammaproteobacteria.Xanthomonadales.Xanthomonadaceae.Pseudoxanthomonas.44ec5a861370410f314049dede7d94e1	0	0.000541126	0.0967025	0.326117	0.91204	0.991796
Bacteria.Proteobacteria.Gammaproteobacteria.Xanthomonadales.Xanthomonadaceae.Achromobacter.d1b4a9dc5980523e33930c9609eccc57	0	0.000238095	0.0162266	0.476276	0.871844	0.991796
Bacteria.Proteobacteria.Gammaproteobacteria.Pseudomonadales.Moraxellaceae.Acinetobacter.4bccbdb96fb331b5bd8aec33cbb8a34e	0.00440678	0.00388342	1.04715	1.91962	0.349315	0.991796
Bacteria.Proteobacteria.Gammaproteobacteria.Pseudomonadales.Moraxellaceae.Alkanindiges.6d19033aef0842ecf59f26bc18cd3b7a	0.00502495	0	0.462049	2.58095	0.278982	0.991796
Bacteria.Proteobacteria.Gammaproteobacteria.Enterobacteriales.Enterobacteriaceae.Pantoea.5a90106a71eb6b7dd8fae5fb1b8967c8	0.00922056	0.00040016	0.162413	1.06328	0.718669	0.991796
Bacteria.Proteobacteria.Gammaproteobacteria.Enterobacteriales.Enterobacteriaceae.Budvicia.f309ea1ec8287026c5e76ba862929f85	0.000143431	0.000541126	0.17851	0.463515	0.87524	0.991796
Bacteria.Proteobacteria.Gammaproteobacteria.Enterobacteriales.Enterobacteriaceae.Proteus.ff879f5418ebe06779501b57b52cb944	0.000277662	0	0.0324776	0.898542	0.76087	0.991796
Bacteria.Proteobacteria.Gammaproteobacteria.Enterobacteriales.Enterobacteriaceae.Moellerella.0962b75ed8d3c13fcf66a3c86a0128c9	0	0.00109051	0.0556228	0.174736	0.952799	0.991796
Bacteria.Proteobacteria.Gammaproteobacteria.Aeromonadales.Aeromonadaceae.Aeromonas.6570e98f6d39bacffe712be49da85a72	0.000955566	0.00080032	0.226183	1.27691	0.665083	0.991796
Bacteria.Proteobacteria.Gammaproteobacteria.Alteromonadales.[Chromatiaceae].Alkalimonas.9a885de364c204eb310fb018084e5357	0	0.00080032	0.0818071	0.326117	0.91204	0.991796
Bacteria.Proteobacteria.Gammaproteobacteria.Alteromonadales.[Chromatiaceae].Rheinheimera.208aa356da260d9027f7dfc6b49af54d	0.000905305	0	0.108705	1.37696	0.640785	0.991796
Bacteria.Proteobacteria.Gammaproteobacteria.Pasteurellales.Pasteurellaceae.Bibersteinia.47721d1f56a0b9265e964921aa2248fb	0.000408747	0	0.0618892	0.898542	0.76087	0.991796
Bacteria.Proteobacteria.Gammaproteobacteria.Alteromonadales.Psychromonadaceae.Psychromonas.51638c2afd1140a79daa8b02a1a9090b	0	0.000503905	0.027866	0.326117	0.91204	0.991796
Bacteria.Proteobacteria.Gammaproteobacteria.Pseudomonadales.Moraxellaceae.Psychrobacter.33d52877b54e4de27599aa035dfe8e9e	0	0.0277987	1.33958	-3.53517	0.18252	0.991796
Bacteria.Proteobacteria.Gammaproteobacteria.Pseudomonadales.Moraxellaceae.Moraxella.6a46bdb51712191a1737a806d2d6d44b	0	0.000278474	0.0279917	0.476276	0.871844	0.991796
Bacteria.Proteobacteria.Gammaproteobacteria.Pseudomonadales.Moraxellaceae.Enhydrobacter.04a75f1199d1bc6b58d19dd8aeb24520	0.00522328	0.033964	1.9724	-0.527846	0.76951	0.991796
Bacteria.Proteobacteria.Gammaproteobacteria.Xanthomonadales.Sinobacteraceae.Hydrocarboniphaga.30193596fa89c079c7ef27a313f0cfa2	0.00194932	0	0.08879	1.35896	0.645166	0.991796
Bacteria.Proteobacteria.Betaproteobacteria.Burkholderiales.Oxalobacteraceae.Massilia.bad0c851088d436414a7f01b1aae88ef	0.00208247	0.0111446	0.232158	-0.276222	0.922682	0.991796
Bacteria.Proteobacteria.Betaproteobacteria.Rhodocyclales.Rhodocyclaceae.Denitromonas.b546da75f8805304e617b23b1981a79e	0	0.000270563	0.0483512	0.476276	0.871844	0.991796
Bacteria.Proteobacteria.Betaproteobacteria.Neisseriales.Neisseriaceae.Neisseria.4ef3d05269c762db631f033432d48b23	0.00320793	0.00658878	0.641905	2.93543	0.297965	0.991796
Bacteria.Proteobacteria.Betaproteobacteria.Burkholderiales.Comamonadaceae.Pseudorhodoferax.c91780e779a75eaa398741394070e0cb	0.0015444	0	0.110604	1.4812	0.615652	0.991796
Bacteria.Proteobacteria.Betaproteobacteria.Burkholderiales.Comamonadaceae.Aquamonas.95ee839040d18494facc49290e1b7b9d	0	0.000835422	0.0839752	0.174736	0.952799	0.991796
Bacteria.Proteobacteria.Betaproteobacteria.Burkholderiales.Oxalobacteraceae.Pseudoburkholderia.dc8a2f47b3d1dc2e1f5f805891976b29	0.0022929	0.00497892	0.461985	2.52827	0.369513	0.991796
Bacteria.Proteobacteria.Betaproteobacteria.Burkholderiales.Alcaligenaceae.Bordetella.01de1ba8287799a3aef50b25bddd9149	0	0.000238095	0.0162266	0.476276	0.871844	0.991796
Bacteria.Proteobacteria.Deltaproteobacteria.Desulfovibrionales.Desulfomicrobiaceae.Desulfomicrobium.383ac7d70fbd66f6b03dbc0c8b97bbfc	0.00103146	0	0.245421	1.57116	0.594303	0.991796
Bacteria.Proteobacteria.Alphaproteobacteria.Sphingomonadales.Sphingomonadaceae.Sphingomonas.3fed50c021c15d83dddd74784a45a92f	0.00139815	0.0129329	1.11902	-1.77716	0.415194	0.991796
Bacteria.Proteobacteria.Alphaproteobacteria.Sphingomonadales.Sphingomonadaceae.Sphingobium.da8dbb9356ed5e68256a9c9ec39bdbdc	0	0.00152625	0.0836115	-0.128155	0.965368	0.991796
Bacteria.Proteobacteria.Alphaproteobacteria.Sphingomonadales.Sphingomonadaceae.Novosphingobium.af537f21f5a1eab898ede4238f914180	0	0.0122443	1.13337	-3.28711	0.215568	0.991796
Bacteria.Proteobacteria.Alphaproteobacteria.Sphingomonadales.Erythrobacteraceae.Altererythrobacter.95ceea8a5fefca4f386021ad2a84a1e4	0	0.00385154	0.329162	-1.56846	0.593706	0.991796
Bacteria.Proteobacteria.Alphaproteobacteria.Caulobacterales.Caulobacteraceae.Asticcacaulis.31522f6854fcca3f25ad841060815407	0	0.00051573	0.0411016	0.174736	0.952799	0.991796
Bacteria.Proteobacteria.Alphaproteobacteria.Caulobacterales.Caulobacteraceae.Brevundimonas.89016bfc2690f6ab6e6441858574611a	0.000398486	0.0015357	0.204578	0.15027	0.957977	0.991796
Bacteria.Proteobacteria.Alphaproteobacteria.Caulobacterales.Caulobacteraceae.Arthrospira.8a49c19f0f3f81049679d4fd3c150c0c	0	0.000541126	0.0967025	0.326117	0.91204	0.991796
Bacteria.Proteobacteria.Alphaproteobacteria.Rhizobiales.Beijerinckiaceae.Chelatococcus.62a8ccc4a0b25cb8d3b394789fb5cb3a	0	0.00040016	0.0409036	0.476276	0.871844	0.991796
Bacteria.Proteobacteria.Alphaproteobacteria.Rhizobiales.Beijerinckiaceae.Salinarimonas.f3d73d44a1d5e0ff2f602d0628097f7e	0.000433791	0.000891742	0.240696	0.299034	0.915871	0.991796
Bacteria.Proteobacteria.Alphaproteobacteria.Rhizobiales.Methylobacteriaceae.Methylobacterium.13ef39327a9a40ce5f44f8b27db52c7c	0.00465069	0.0127134	1.16441	-0.930991	0.631873	0.991796
Bacteria.Proteobacteria.Alphaproteobacteria.Rhodobacterales.Rhodobacteraceae.Haematobacter.63f023ad464aa1abe0c45ecb0b9fdc37	0.00014518	0.00359202	0.370212	-1.45861	0.609655	0.991796
Bacteria.Proteobacteria.Alphaproteobacteria.Rhizobiales.Bartonellaceae.Bartonella.3fbb76335551166a44f32d2a1cdb6bd3	0.000267523	0	0.0369258	0.898542	0.76087	0.991796
Bacteria.Proteobacteria.Alphaproteobacteria.Rhizobiales.Rhizobiaceae.Rhizobium.d201ef05844489782f0eebffc3f14194	0.00551498	0.000388727	0.180328	1.19681	0.677796	0.991796
Bacteria.Proteobacteria.Alphaproteobacteria.Rhodospirillales.Acetobacteraceae.Roseomonas.2ef96f4d19cfd273e3494f6b373fae32	0.000204374	0	0.0309446	0.757764	0.797449	0.991796
Bacteria.Bacteroidetes.Cytophagia.Cytophagales.Flammeovirgaceae.Marinoscillum.b888c128917c9e774de7aea72ee637fe	0	0.000278474	0.0279917	0.476276	0.871844	0.991796
Bacteria.Bacteroidetes.Sphingobacteriia.Sphingobacteriales.Sphingobacteriaceae.Mucilaginibacter.cef94d778253d70f69b517b478d0ccd2	0	0.00739315	0.458383	-2.00866	0.493875	0.991796
Bacteria.Bacteroidetes.Sphingobacteriia.Sphingobacteriales.Sphingobacteriaceae.Pedobacter.8b865408e859812c10926cbc98bdabf6	0	0.002071	0.208854	-0.459286	0.876306	0.991796
Bacteria.Bacteroidetes.[Saprospirae].[Saprospirales].Chitinophagaceae.Terrimonas.d52b5ca0165aa707171c6cccbb5e17c1	0.00034382	0	0.0818071	0.898542	0.76087	0.991796
Bacteria.Bacteroidetes.[Saprospirae].[Saprospirales].Chitinophagaceae.Trachelomonas.c426c7a58663d2f894f546c026bb7279	0	0.00787713	0.149619	-0.128155	0.965368	0.991796
Bacteria.Bacteroidetes.[Saprospirae].[Saprospirales].Chitinophagaceae.Parasegitibacter.39bd57cfd1ed69dea62041310cb90b39	0	0.000556948	0.0559835	0.326117	0.91204	0.991796
Bacteria.Bacteroidetes.Bacteroidia.Bacteroidales.Rikenellaceae.Alistipes.b61cbccae82bfeb94bc752b6c1efe1ba	0.000613121	0	0.0928338	1.0473	0.722773	0.991796
Bacteria.Bacteroidetes.Bacteroidia.Bacteroidales.Porphyromonadaceae.Vestibaculum.e7f570372730567b27a0f790f81e24d0	0.00014518	0	0.0369433	0.757764	0.797449	0.991796
Bacteria.Bacteroidetes.Bacteroidia.Bacteroidales.Porphyromonadaceae.Macellibacteroides.b7972cec4a1f081c7dd2bb2e87160853	0.00127409	0	0.192501	1.88731	0.521955	0.991796
Bacteria.Bacteroidetes.Bacteroidia.Bacteroidales.Bacteroidaceae.Bacteroides.7c76c4592199ce1c62209e422b9207da	0.00143062	0.00119048	0.297745	1.05695	0.719874	0.991796
Bacteria.Bacteroidetes.Flavobacteriia.Flavobacteriales.[Weeksellaceae].Weeksella.ff363bebf2dd08c7259bea87b082328b	0.000131182	0.00280112	0.323943	-0.556582	0.850293	0.991796
Bacteria.Bacteroidetes.Flavobacteriia.Flavobacteriales.[Weeksellaceae].Elizabethkingia.a68f1205d4074f8928125564ed7681d2	0.00565804	0.0247478	2.54626	-1.18623	0.543539	0.991796
Bacteria.[Thermi].Deinococci.Deinococcales.Trueperaceae.Truepera.bf991db3249937049e80d12840efa7dc	0	0.000270563	0.0483512	0.476276	0.871844	0.991796
Bacteria.Firmicutes.Clostridia.Clostridiales.[Tissierellaceae].Finegoldia.8dc4520cb0b6df47a8b7d0832a252cb0	0.00119638	0.00408716	0.330719	1.35553	0.601152	0.991796
Bacteria.Firmicutes.Bacilli.Bacillales.Alicyclobacillaceae.Alicyclobacillus.1e8259fa619a18b1968c52d6e0d533ab	0	0.00035014	0.0299239	0.476276	0.871844	0.991796
Bacteria.Firmicutes.Clostridia.Clostridiales.[Tissierellaceae].Peptoniphilus.244197657e8c6f47a0b10a5ec21b4ee2	0.000753466	0.0170764	0.242741	0.363199	0.901998	0.991796
Bacteria.Firmicutes.Clostridia.Clostridiales.Peptostreptococcaceae.[Clostridium].1a0b1855c9f3ea22a57f898b23e3de48	0.000798085	0	0.0894836	1.36013	0.64488	0.991796
Bacteria.Firmicutes.Clostridia.Clostridiales.Clostridiaceae.Clostridium.f52c7d052641860703cab377fe3ccdc0	0.000817494	0.0011655	0.231775	0.12772	0.965465	0.991796
Bacteria.Firmicutes.Clostridia.Clostridiales.Lachnospiraceae.Clostridium.d75b122f2c644edad42f1a30862891f8	0.00060799	0	0.0922666	1.0473	0.722773	0.991796
Bacteria.Firmicutes.Clostridia.Clostridiales.Lachnospiraceae.Butyrivibrio.911675f4d32e3554da9c75204456b761	0.00102187	0	0.154723	1.37696	0.640785	0.991796
Bacteria.Firmicutes.Clostridia.Clostridiales.Lachnospiraceae.Lachnoanaerobaculum.ed76405b72d79e786349562d5456231c	0	0.00107009	0.102003	-0.283299	0.923529	0.991796
Bacteria.Firmicutes.Clostridia.Clostridiales.Lachnospiraceae.Dorea.890eb9242a407d4bf47d324d8de14335	0.000408747	0	0.0618892	0.898542	0.76087	0.991796
Bacteria.Firmicutes.Clostridia.Clostridiales.Ruminococcaceae.Clostridium.349bab8da37ab503ccfc4de9df2f71ae	0	0.00051573	0.0411016	0.174736	0.952799	0.991796
Bacteria.Firmicutes.Clostridia.Clostridiales.Ruminococcaceae.Faecalibacterium.b167ad9fdf6c2158e6e90d7756049242	0	0.00538541	0.0491506	0.476276	0.871844	0.991796
Bacteria.Firmicutes.Clostridia.Clostridiales.Veillonellaceae.Selenomonas.4da1b1b2e428318ec9623defd4476d0c	0.000584283	0.00468587	0.129997	1.06328	0.718669	0.991796
Bacteria.Firmicutes.Clostridia.Clostridiales.Veillonellaceae.Schwartzia.ce5c3a7245ba9821b02fc3a42e08abe9	0	0.000207943	0.0368909	0.476276	0.871844	0.991796
Bacteria.Firmicutes.Clostridia.Clostridiales.Veillonellaceae.Anaerosinus.5be9166c67205b79942c8fb0a1d8ce70	0.0035192	0.0237938	0.757366	-1.52792	0.602269	0.991796
Bacteria.Actinobacteria.Actinobacteria.Actinomycetales.ACK-M1.Planktophila.2979c053db11fc54c100e34504aabf25	0	0.000541126	0.0967025	0.326117	0.91204	0.991796
Bacteria.Actinobacteria.Actinobacteria.Actinomycetales.Nocardioidaceae.Nocardioides.5e237fdf24ec5a39da3a96f651960bdd	0.000477783	0.010565	0.803807	-2.22705	0.331397	0.991796
Bacteria.Actinobacteria.Actinobacteria.Actinomycetales.Nocardioidaceae.Marmoricola.ddc8ce86b5a361f7af0b58d8c1d42f45	0	0.00161603	0.108998	0.174737	0.952799	0.991796
Bacteria.Actinobacteria.Actinobacteria.Actinomycetales.Streptomycetaceae.Streptomyces.0f075fb250791a7be3529922c3afb62f	0	0.00080032	0.0818071	0.326117	0.91204	0.991796
Bacteria.Actinobacteria.Actinobacteria.Actinomycetales.Pseudonocardiaceae.Actinomycetospora.fd5c732c79ff61262c7555ee3ba719d3	0.000133761	0.00920253	0.174956	0.161548	0.951078	0.991796
Bacteria.Actinobacteria.Actinobacteria.Actinomycetales.Intrasporangiaceae.Ornithinimicrobium.6931a2d4d5eff1731b7185469c077bca	0	0.00422992	0.0967025	0.326117	0.91204	0.991796
Bacteria.Actinobacteria.Actinobacteria.Actinomycetales.Micrococcaceae.Rothia.a38d5871c6a2558a5483e235b81ccea7	0.000805161	0	0.110755	1.20737	0.682507	0.991796
Bacteria.Actinobacteria.Actinobacteria.Actinomycetales.Micrococcaceae.Kocuria.e783488708509f26ddc8c0f8bc697020	0.00638502	0.00743466	1.84748	0.426942	0.763606	0.991796
Bacteria.Actinobacteria.Actinobacteria.Actinomycetales.Micrococcaceae.Micrococcus.aafd0372aa6ff1c4f503f04010930ea1	0	0.00490114	0.40903	-1.81201	0.525095	0.991796
Bacteria.Actinobacteria.Actinobacteria.Actinomycetales.Micrococcaceae.Arthrobacter.6b780e361cfc5f06def718518324bdcb	0.00190937	0.0211353	0.568617	-0.678134	0.754141	0.991796
Bacteria.Actinobacteria.Actinobacteria.Actinomycetales.Microbacteriaceae.Leifsonia.009c0490f447bd0906ccd1112dfc0e41	0.000398486	0	0.0607548	0.898542	0.76087	0.991796
Bacteria.Actinobacteria.Actinobacteria.Actinomycetales.Promicromonosporaceae.Xylanimicrobium.b959654b051fd245f2011066f7b28a1b	0	0.00035014	0.0299239	0.476276	0.871844	0.991796
Bacteria.Actinobacteria.Actinobacteria.Actinomycetales.Actinomycetaceae.Actinomyces.c70086368129a076a470442872b48ec8	0.00029036	0.0129436	0.985125	-2.67909	0.316038	0.991796
Bacteria.Actinobacteria.Actinobacteria.Bifidobacteriales.Bifidobacteriaceae.Gardnerella.25d1232b636c9951b58814d31052467f	0	0.000194363	0.023555	0.476276	0.871844	0.991796
Bacteria.Actinobacteria.Actinobacteria.Bifidobacteriales.Bifidobacteriaceae.Bifidobacterium.8d29a4b0e2aa4632d98d3b302ea9ef31	0.00278474	0	0.126843	1.57896	0.592468	0.991796
Bacteria.Actinobacteria.Actinobacteria.Actinomycetales.Geodermatophilaceae.Blastococcus.662b29eb9082207780e8449c2d3e2f66	0.000613121	0.00070028	0.152681	0.753051	0.798639	0.991796
Bacteria.Actinobacteria.Actinobacteria.Actinomycetales.Dietziaceae.Dietzia.611f22c4148835b3347e113a625e4b3f	0.00143513	0.00505491	0.6108	-0.649086	0.808767	0.991796
Bacteria.Actinobacteria.Actinobacteria.Actinomycetales.Geodermatophilaceae.Actinotelluria.833dfe956dff1abbb2d410875b168bfb	0	0.00210084	0.179543	-0.283299	0.923529	0.991796
Bacteria.Actinobacteria.Thermoleophilia.Solirubrobacterales.Solirubrobacteraceae.Solirubrobacter.9bbfa59334bffb8eeb01a78e49505dc0	0.00127932	0	0.124289	1.56373	0.596053	0.991796
Bacteria.Actinobacteria.Thermoleophilia.Gaiellales.Gaiellaceae.Gaiella.e5b018058076e271a017fdadafc957ff	0	0.00139565	0.112869	-0.435795	0.88259	0.991796
Bacteria.Firmicutes.Bacilli.Bacillales.[Thermicanaceae].Thermicanus.0e8e8013a43f936ffdbcabe02759c427	0	0.0018315	0.100334	-0.283299	0.923529	0.991796
Bacteria.Firmicutes.Bacilli.Bacillales.Paenibacillaceae.Paenibacillus.aa3537df624513208d209d3f6cb35b02	0	0.00093985	0.0681717	0.174736	0.952799	0.991796
Bacteria.Firmicutes.Bacilli.Bacillales.Planococcaceae.Bacillus.6d350e1fecb972294579217f2a162e80	0.00017191	0	0.0409036	0.757764	0.797449	0.991796
Bacteria.Firmicutes.Bacilli.Bacillales.Bacillaceae.Bacillus.8adb5559e135233565acfea1287280bf	0.000772959	0.00244778	0.279598	0.176595	0.942125	0.991796
Bacteria.Firmicutes.Bacilli.Bacillales.Planococcaceae.Kurthia.c740f718c86d6e26b1435cabd580ffd7	0.000955566	0	0.144376	1.57116	0.594303	0.991796
Bacteria.Firmicutes.Bacilli.Lactobacillales.Aerococcaceae.Alloiococcus.fdb77967f908752412f454de1ff74bbf	0	0.00327731	0.318778	-0.890654	0.76247	0.991796
Bacteria.Firmicutes.Bacilli.Lactobacillales.Streptococcaceae.Streptococcus.8ff08d154f7dfc93b7ae48c3e3f85221	0.00889382	0.0750113	8.17408	-1.84055	0.11567	0.991796
Bacteria.Firmicutes.Bacilli.Lactobacillales.Aerococcaceae.Granulicatella.ff7d4bee8575f9b437d41aecf5fb05fc	0	0.000915751	0.0501669	0.174736	0.952799	0.991796
Bacteria.Firmicutes.Bacilli.Lactobacillales.Carnobacteriaceae.Isobaculum.13e52764e1c08c4fd9902769bf9e022e	0	0.00034382	0.0274011	0.326117	0.91204	0.991796
Bacteria.Firmicutes.Bacilli.Lactobacillales.Leuconostocaceae.Weissella.620edd2956ede81b09704c3f3f5657fa	0.00034382	0	0.0818071	0.898542	0.76087	0.991796
Bacteria.Firmicutes.Bacilli.Lactobacillales.Lactobacillaceae.Lactobacillus.6658f31f4b3defccbc037636b27672e0	0.0026074	0.00234862	0.402544	0.755749	0.759344	0.991796
Bacteria.Firmicutes.Bacilli.Bacillales.Planococcaceae.Staphylococcus.ed731f07a20332ea13fc88a1752b45ed	0.00058072	0.00905052	0.686985	-1.63548	0.503998	0.991796
Bacteria.Firmicutes.Bacilli.Bacillales.Staphylococcaceae.Macrococcus.65eb5f66ec11cb6fcb1bb3d469c9152b	0.000204374	0.00562082	0.130783	-0.145901	0.960573	0.991796
Bacteria.Firmicutes.Bacilli.Bacillales.Staphylococcaceae.Staphylococcus.10fb2f2d675388a8c991c2a4431bdfaa	0	0.000626566	0.0454478	0.326117	0.91204	0.991796
Bacteria.Proteobacteria.Gammaproteobacteria.Alteromonadales.Alteromonadaceae.Gilvimarinus.c1f8fc98fa356b4c47a8f50fa9fa142a	0	0.00222023	0.145411	0.0233109	0.993699	0.993699
Bacteria.Bacteroidetes.Bacteroidia.Bacteroidales.[Paraprevotellaceae].[Prevotella].15a3b1db98e2773a35c66e3c89fc4069	0	0.00211623	0.171861	0.0233109	0.993699	0.993699
Bacteria.Firmicutes.Clostridia.Clostridiales.[Tissierellaceae].WAL_1855D.d9edfe40997a6da1040fecb878feb158	0	0.000666001	0.0617125	0.0233109	0.993699	0.993699

## Sheet: 4_16S_taxa_all_patients_oL5vs_o
Taxa	Abundance in oL4	Abundance in oL5	baseMean	Log fold-change	p-value	Adj. p-val
Bacteria.Actinobacteria.Actinobacteria.Actinomycetales.Mycobacteriaceae.Mycobacterium.403432032a5dcac89b8cb1610988f69e	0.865617	0.0265009	197.11	5.85685	1.1e-10	3.41e-09
Bacteria.Firmicutes.Clostridia.Clostridiales.Veillonellaceae.Anaerosinus.5c76bdf5d4af155634aae61fcd866804	0.0035192	0.126571	11.7975	-4.97995	1.04e-06	1.61e-05
Bacteria.Firmicutes.Bacilli.Lactobacillales.Streptococcaceae.Streptococcus.d3d16f870dfadf956370c3aba43e4098	0.00889382	0.235553	23.5669	-4.20298	3.26e-06	3.37e-05
Bacteria.Bacteroidetes.Bacteroidia.Bacteroidales.Prevotellaceae.Prevotella.040b1ab5b026b8b7c77744cb29c6ca7b	0.0145464	0.20466	23.7856	-3.98591	2.12e-05	0.000164622
Bacteria.Actinobacteria.Actinobacteria.Actinomycetales.Actinomycetaceae.Actinomyces.9c1454b23d7b9e86ad391e0b238ee420	0.00029036	0.0172744	1.77765	-4.23391	0.000383027	0.00237477
Bacteria.Actinobacteria.Actinobacteria.Actinomycetales.Micrococcaceae.Kocuria.e85e34c0ba855c2e668db26708ee0d4f	0.00638502	0.0460345	5.74829	-2.7363	0.00237384	0.0122648
Bacteria.Proteobacteria.Betaproteobacteria.Neisseriales.Neisseriaceae.Neisseria.4ef3d05269c762db631f033432d48b23	0.00320793	0.0600364	7.82988	-4.17653	0.00327426	0.0126878
Bacteria.Actinobacteria.Actinobacteria.Actinomycetales.Corynebacteriaceae.Corynebacterium.c7fbd561062023ced0db0e8b8d9e2fb8	0.00655966	0.0463529	5.22918	-2.42861	0.00313486	0.0126878
Bacteria.Bacteroidetes.Bacteroidia.Bacteroidales.Bacteroidaceae.Bacteroides.1687ff6cb098eb6ba9d74ea55829d76a	0.00143062	0.0166927	1.78646	-3.30555	0.00481225	0.0165755
Bacteria.Firmicutes.Clostridia.Clostridiales.Ruminococcaceae.Faecalibacterium.11b6e085e506436abb45e998147d138a	0	0.00848046	0.90666	-3.61588	0.0184978	0.0573431
Bacteria.Bacteroidetes.Bacteroidia.Bacteroidales.Porphyromonadaceae.Porphyromonas.9e06ff8f82499e1f457e55e8a7157d0d	0	0.00731036	0.942151	-3.65866	0.0269375	0.0759148
Bacteria.Proteobacteria.Epsilonproteobacteria.Campylobacterales.Campylobacteraceae.Campylobacter.bc2e91c177dcf042f2ecde858c2e64ed	0.00029036	0.00545029	0.680849	-2.73252	0.0357067	0.0922423
Bacteria.Proteobacteria.Gammaproteobacteria.Pasteurellales.Pasteurellaceae.Actinobacillus.1f49a099a6d886e26ffc43d09e9a8baa	0	0.00583468	0.5821	-2.988	0.0390615	0.0931467
Bacteria.Firmicutes.Clostridia.Clostridiales.Lachnospiraceae.Clostridium.1a06278b8ee636d8fd7e5352e07ccccb	0.00060799	0.00558681	0.650233	-2.51634	0.133281	0.275448
Bacteria.Firmicutes.Bacilli.Lactobacillales.Aerococcaceae.Alloiococcus.fdb77967f908752412f454de1ff74bbf	0	0.00579976	0.636846	-3.09302	0.129152	0.275448
Bacteria.Actinobacteria.Coriobacteriia.Coriobacteriales.Coriobacteriaceae.Atopobium.bba6da0e81f92e0b2af4e957cd69f42e	0	0.0036	0.36534	-2.35571	0.230422	0.446444
Bacteria.Proteobacteria.Alphaproteobacteria.Sphingomonadales.Sphingomonadaceae.Sphingobium.da8dbb9356ed5e68256a9c9ec39bdbdc	0	0.0039327	0.359656	-2.34064	0.312118	0.569156
Bacteria.Firmicutes.Erysipelotrichi.Erysipelotrichales.Erysipelotrichaceae.Catenibacterium.9b119c3c0fa910deca32fd7571866de7	0	0.00313798	0.388592	-2.40525	0.333633	0.574589
Bacteria.Proteobacteria.Gammaproteobacteria.Oceanospirillales.Halomonadaceae.Halomonas.508a0422d2d6020fa33e62858488a797	0.00327439	0.000603865	0.624819	1.93601	0.364715	0.595062
Bacteria.Firmicutes.Clostridia.Clostridiales.[Tissierellaceae].Peptoniphilus.244197657e8c6f47a0b10a5ec21b4ee2	0.000753466	0.0142665	0.513615	-1.652	0.402605	0.624038
Bacteria.Actinobacteria.Actinobacteria.Actinomycetales.Pseudonocardiaceae.Actinomycetospora.fd5c732c79ff61262c7555ee3ba719d3	0.000133761	0.00290475	0.346688	-1.85759	0.459691	0.678591
Bacteria.Proteobacteria.Betaproteobacteria.Burkholderiales.Oxalobacteraceae.Pseudoburkholderia.dc8a2f47b3d1dc2e1f5f805891976b29	0.0022929	0.000381098	0.384352	1.54939	0.542026	0.706519
Bacteria.Bacteroidetes.Flavobacteriia.Flavobacteriales.[Weeksellaceae].Elizabethkingia.a68f1205d4074f8928125564ed7681d2	0.00565804	0.0109339	1.91392	-1.08212	0.515311	0.706519
Bacteria.Firmicutes.Clostridia.Clostridiales.[Tissierellaceae].Finegoldia.8dc4520cb0b6df47a8b7d0832a252cb0	0.00119638	0.00341173	0.65932	-1.28743	0.546983	0.706519
Bacteria.Proteobacteria.Gammaproteobacteria.Pseudomonadales.Moraxellaceae.Alkanindiges.6d19033aef0842ecf59f26bc18cd3b7a	0.00502495	0.00114679	0.480477	0.911628	0.649751	0.805691
Bacteria.Actinobacteria.Actinobacteria.Actinomycetales.Dietziaceae.Dietzia.611f22c4148835b3347e113a625e4b3f	0.00143513	0.00738646	0.488716	-0.721538	0.703574	0.838877
Bacteria.Proteobacteria.Gammaproteobacteria.Pseudomonadales.Moraxellaceae.Enhydrobacter.04a75f1199d1bc6b58d19dd8aeb24520	0.00522328	0.00696013	1.37745	-0.453903	0.765281	0.841211
Bacteria.Proteobacteria.Alphaproteobacteria.Sphingomonadales.Sphingomonadaceae.Sphingomonas.7c1996197bcba013b22ab7281d893936	0.00139815	0.00337113	0.443404	-0.713608	0.74159	0.841211
Bacteria.Proteobacteria.Alphaproteobacteria.Rhizobiales.Methylobacteriaceae.Methylobacterium.a55c76a00f38acb391d3ec56b134a7c4	0.00465069	0.00402638	0.670236	-0.583038	0.786939	0.841211
Bacteria.Proteobacteria.Gammaproteobacteria.Pseudomonadales.Moraxellaceae.Acinetobacter.4bccbdb96fb331b5bd8aec33cbb8a34e	0.00440678	0.00610278	1.23181	-0.35981	0.843257	0.871365
Bacteria.Proteobacteria.Gammaproteobacteria.Pseudomonadales.Pseudomonadaceae.Pseudomonas.4e251742b2e231c82ea873aaaa212263	0.00604691	0.00399254	0.679598	0.0638057	0.971476	0.971476

## Sheet: 5_16S_taxa_dTBLs_dL1_vs_dL2
Taxa	Abundance in dL1	Abundance in dL2	baseMean	Log fold-change	p-value	Adj. p-val
Bacteria.Actinobacteria.Actinobacteria.Actinomycetales.Mycobacteriaceae.Mycobacterium.403432032a5dcac89b8cb1610988f69e	0.865617	0.0265009	197.11	5.85685	1.1e-10	3.41e-09
Bacteria.Firmicutes.Clostridia.Clostridiales.Veillonellaceae.Anaerosinus.5c76bdf5d4af155634aae61fcd866804	0.0035192	0.126571	11.7975	-4.97995	1.04e-06	1.61e-05
Bacteria.Firmicutes.Bacilli.Lactobacillales.Streptococcaceae.Streptococcus.d3d16f870dfadf956370c3aba43e4098	0.00889382	0.235553	23.5669	-4.20298	3.26e-06	3.37e-05
Bacteria.Bacteroidetes.Bacteroidia.Bacteroidales.Prevotellaceae.Prevotella.040b1ab5b026b8b7c77744cb29c6ca7b	0.0145464	0.20466	23.7856	-3.98591	2.12e-05	0.000164622
Bacteria.Actinobacteria.Actinobacteria.Actinomycetales.Actinomycetaceae.Actinomyces.9c1454b23d7b9e86ad391e0b238ee420	0.00029036	0.0172744	1.77765	-4.23391	0.000383027	0.00237477
Bacteria.Actinobacteria.Actinobacteria.Actinomycetales.Micrococcaceae.Kocuria.e85e34c0ba855c2e668db26708ee0d4f	0.00638502	0.0460345	5.74829	-2.7363	0.00237384	0.0122648
Bacteria.Proteobacteria.Betaproteobacteria.Neisseriales.Neisseriaceae.Neisseria.4ef3d05269c762db631f033432d48b23	0.00320793	0.0600364	7.82988	-4.17653	0.00327426	0.0126878
Bacteria.Actinobacteria.Actinobacteria.Actinomycetales.Corynebacteriaceae.Corynebacterium.c7fbd561062023ced0db0e8b8d9e2fb8	0.00655966	0.0463529	5.22918	-2.42861	0.00313486	0.0126878
Bacteria.Bacteroidetes.Bacteroidia.Bacteroidales.Bacteroidaceae.Bacteroides.1687ff6cb098eb6ba9d74ea55829d76a	0.00143062	0.0166927	1.78646	-3.30555	0.00481225	0.0165755
Bacteria.Firmicutes.Clostridia.Clostridiales.Ruminococcaceae.Faecalibacterium.11b6e085e506436abb45e998147d138a	0	0.00848046	0.90666	-3.61588	0.0184978	0.0573431
Bacteria.Bacteroidetes.Bacteroidia.Bacteroidales.Porphyromonadaceae.Porphyromonas.9e06ff8f82499e1f457e55e8a7157d0d	0	0.00731036	0.942151	-3.65866	0.0269375	0.0759148
Bacteria.Proteobacteria.Epsilonproteobacteria.Campylobacterales.Campylobacteraceae.Campylobacter.bc2e91c177dcf042f2ecde858c2e64ed	0.00029036	0.00545029	0.680849	-2.73252	0.0357067	0.0922423
Bacteria.Proteobacteria.Gammaproteobacteria.Pasteurellales.Pasteurellaceae.Actinobacillus.1f49a099a6d886e26ffc43d09e9a8baa	0	0.00583468	0.5821	-2.988	0.0390615	0.0931467
Bacteria.Firmicutes.Clostridia.Clostridiales.Lachnospiraceae.Clostridium.1a06278b8ee636d8fd7e5352e07ccccb	0.00060799	0.00558681	0.650233	-2.51634	0.133281	0.275448
Bacteria.Firmicutes.Bacilli.Lactobacillales.Aerococcaceae.Alloiococcus.fdb77967f908752412f454de1ff74bbf	0	0.00579976	0.636846	-3.09302	0.129152	0.275448
Bacteria.Actinobacteria.Coriobacteriia.Coriobacteriales.Coriobacteriaceae.Atopobium.bba6da0e81f92e0b2af4e957cd69f42e	0	0.0036	0.36534	-2.35571	0.230422	0.446444
Bacteria.Proteobacteria.Alphaproteobacteria.Sphingomonadales.Sphingomonadaceae.Sphingobium.da8dbb9356ed5e68256a9c9ec39bdbdc	0	0.0039327	0.359656	-2.34064	0.312118	0.569156
Bacteria.Firmicutes.Erysipelotrichi.Erysipelotrichales.Erysipelotrichaceae.Catenibacterium.9b119c3c0fa910deca32fd7571866de7	0	0.00313798	0.388592	-2.40525	0.333633	0.574589
Bacteria.Proteobacteria.Gammaproteobacteria.Oceanospirillales.Halomonadaceae.Halomonas.508a0422d2d6020fa33e62858488a797	0.00327439	0.000603865	0.624819	1.93601	0.364715	0.595062
Bacteria.Firmicutes.Clostridia.Clostridiales.[Tissierellaceae].Peptoniphilus.244197657e8c6f47a0b10a5ec21b4ee2	0.000753466	0.0142665	0.513615	-1.652	0.402605	0.624038
Bacteria.Actinobacteria.Actinobacteria.Actinomycetales.Pseudonocardiaceae.Actinomycetospora.fd5c732c79ff61262c7555ee3ba719d3	0.000133761	0.00290475	0.346688	-1.85759	0.459691	0.678591
Bacteria.Proteobacteria.Betaproteobacteria.Burkholderiales.Oxalobacteraceae.Pseudoburkholderia.dc8a2f47b3d1dc2e1f5f805891976b29	0.0022929	0.000381098	0.384352	1.54939	0.542026	0.706519
Bacteria.Bacteroidetes.Flavobacteriia.Flavobacteriales.[Weeksellaceae].Elizabethkingia.a68f1205d4074f8928125564ed7681d2	0.00565804	0.0109339	1.91392	-1.08212	0.515311	0.706519
Bacteria.Firmicutes.Clostridia.Clostridiales.[Tissierellaceae].Finegoldia.8dc4520cb0b6df47a8b7d0832a252cb0	0.00119638	0.00341173	0.65932	-1.28743	0.546983	0.706519
Bacteria.Proteobacteria.Gammaproteobacteria.Pseudomonadales.Moraxellaceae.Alkanindiges.6d19033aef0842ecf59f26bc18cd3b7a	0.00502495	0.00114679	0.480477	0.911628	0.649751	0.805691
Bacteria.Actinobacteria.Actinobacteria.Actinomycetales.Dietziaceae.Dietzia.611f22c4148835b3347e113a625e4b3f	0.00143513	0.00738646	0.488716	-0.721538	0.703574	0.838877
Bacteria.Proteobacteria.Gammaproteobacteria.Pseudomonadales.Moraxellaceae.Enhydrobacter.04a75f1199d1bc6b58d19dd8aeb24520	0.00522328	0.00696013	1.37745	-0.453903	0.765281	0.841211
Bacteria.Proteobacteria.Alphaproteobacteria.Sphingomonadales.Sphingomonadaceae.Sphingomonas.7c1996197bcba013b22ab7281d893936	0.00139815	0.00337113	0.443404	-0.713608	0.74159	0.841211
Bacteria.Proteobacteria.Alphaproteobacteria.Rhizobiales.Methylobacteriaceae.Methylobacterium.a55c76a00f38acb391d3ec56b134a7c4	0.00465069	0.00402638	0.670236	-0.583038	0.786939	0.841211
Bacteria.Proteobacteria.Gammaproteobacteria.Pseudomonadales.Moraxellaceae.Acinetobacter.4bccbdb96fb331b5bd8aec33cbb8a34e	0.00440678	0.00610278	1.23181	-0.35981	0.843257	0.871365
Bacteria.Proteobacteria.Gammaproteobacteria.Pseudomonadales.Pseudomonadaceae.Pseudomonas.4e251742b2e231c82ea873aaaa212263	0.00604691	0.00399254	0.679598	0.0638057	0.971476	0.971476

## Sheet: 6_16S_taxa_dTBLs_dL1_vs_dL3
Taxa	Abundance in dL1	Abundance in dL3	baseMean	Log fold-change	p-value	Adj. p-val
Bacteria.Actinobacteria.Actinobacteria.Actinomycetales.Mycobacteriaceae.Mycobacterium.403432032a5dcac89b8cb1610988f69e	0.896496	0.129706	195.335	4.73972	2.86e-08	4.37e-06
Bacteria.Actinobacteria.Actinobacteria.Actinomycetales.Corynebacteriaceae.Corynebacterium.8a82820cc1075421faf42ec4285f23b3	0.00808613	0.105403	12.8026	-2.59085	0.00354447	0.271152
Bacteria.Proteobacteria.Epsilonproteobacteria.Campylobacterales.Campylobacteraceae.Campylobacter.14a597495c9c251d0a3bd884e90977db	0	0.00310734	0.273287	-0.460519	0.864118	0.999457
Bacteria.Proteobacteria.Gammaproteobacteria.Chromatiales.Halothiobacillaceae.Thiofaba.acd996faade392f99f28bc503e9c347b	0	0.000125502	0.0145052	0.771288	0.810231	0.999457
Bacteria.Proteobacteria.Gammaproteobacteria.Oceanospirillales.Oceanospirillaceae.Marinomonas.49dbc423c4a7da144b5eeb37d9d05733	0	0.000570776	0.05755	0.454674	0.887429	0.999457
Bacteria.Proteobacteria.Gammaproteobacteria.Alteromonadales.Alteromonadaceae.Gilvimarinus.c1f8fc98fa356b4c47a8f50fa9fa142a	0	0.00097135	0.10754	0.582777	0.856022	0.999457
Bacteria.Proteobacteria.Gammaproteobacteria.Enterobacteriales.Enterobacteriaceae.Pseudomonas.f2b99a001673871809b58e7c9c61856a	0.000361011	0.00129717	0.175561	0.571724	0.855289	0.999457
Bacteria.Proteobacteria.Gammaproteobacteria.Pseudomonadales.Pseudomonadaceae.Pseudomonas.6af10ea5c29e3cb23de0f460c78a2163	0.00137849	0.0188662	1.88935	-1.72196	0.252606	0.999457
Bacteria.Proteobacteria.Gammaproteobacteria.Legionellales.Legionellaceae.Legionella.fce1f65d85af55a5c8d369cdb65ecc78	0	0.0011922	0.144266	0.119783	0.970249	0.999457
Bacteria.Proteobacteria.Gammaproteobacteria.Oceanospirillales.Halomonadaceae.Chromohalobacter.fe0abdc6399b94cd758eaf2ddd91e35e	0	0.00126689	0.120983	0.256804	0.936272	0.999457
Bacteria.Proteobacteria.Gammaproteobacteria.Oceanospirillales.Halomonadaceae.Halomonas.4eed1d9d91f28343e0c44bc2bd71c05a	0.00343811	0.009223	1.42311	0.277805	0.885788	0.999457
Bacteria.Proteobacteria.Gammaproteobacteria.Thiotrichales.Thiotrichaceae.Thiothrix.e82764ea92a6cce9c37e9486b1c170dc	0	0.00127551	0.0815276	0.135991	0.966226	0.999457
Bacteria.Proteobacteria.Gammaproteobacteria.Xanthomonadales.Xanthomonadaceae.Lysobacter.27fdb3135177b018c55fe0748950ccf1	0	0.00432561	0.201978	-0.259743	0.934539	0.999457
Bacteria.Proteobacteria.Gammaproteobacteria.Xanthomonadales.Xanthomonadaceae.Thermomonas.bdf99bd0f01d6b6259ae12aea51d706a	0	0.00116922	0.0747337	0.177999	0.955803	0.999457
Bacteria.Proteobacteria.Gammaproteobacteria.Xanthomonadales.Xanthomonadaceae.Pseudoxanthomonas.406419ab9947ee844a9bf617338ca05b	0	0.0015909	0.215845	-0.103233	0.973614	0.999457
Bacteria.Proteobacteria.Gammaproteobacteria.Xanthomonadales.Xanthomonadaceae.Xanthomonas.6e7bfd8302488122ab735f8b1638aac3	0	0.000563063	0.0576372	0.518727	0.8717	0.999457
Bacteria.Proteobacteria.Gammaproteobacteria.Xanthomonadales.Xanthomonadaceae.Achromobacter.1dfad3e87026bec25ad21b02370ba6ff	0	0.000563063	0.0558869	0.518727	0.8717	0.999457
Bacteria.Proteobacteria.Gammaproteobacteria.Pseudomonadales.Moraxellaceae.Acinetobacter.f3b178d47f09d2c2fc4e2d211747bfe8	0.00182283	0.0361923	3.111	-0.796221	0.540958	0.999457
Bacteria.Proteobacteria.Gammaproteobacteria.Enterobacteriales.Enterobacteriaceae.Profftia.a814875688548c36d94578ca42ae3e41	0	0.000167336	0.019406	0.708595	0.825396	0.999457
Bacteria.Proteobacteria.Gammaproteobacteria.Pseudomonadales.Moraxellaceae.Alkanindiges.6d19033aef0842ecf59f26bc18cd3b7a	0.000415553	0.00306694	0.372642	0.0386603	0.987631	0.999457
Bacteria.Proteobacteria.Gammaproteobacteria.Enterobacteriales.Enterobacteriaceae.Pantoea.5a90106a71eb6b7dd8fae5fb1b8967c8	0.00968158	0.00770871	0.238249	0.663432	0.804778	0.999457
Bacteria.Proteobacteria.Gammaproteobacteria.Enterobacteriales.Enterobacteriaceae.Budvicia.f309ea1ec8287026c5e76ba862929f85	0.000150602	0.0016444	0.255355	0.201005	0.94805	0.999457
Bacteria.Proteobacteria.Gammaproteobacteria.Enterobacteriales.Enterobacteriaceae.Proteus.ff879f5418ebe06779501b57b52cb944	0.000291545	0.00249413	0.022551	1.14886	0.72054	0.999457
Bacteria.Proteobacteria.Gammaproteobacteria.Enterobacteriales.Enterobacteriaceae.Moellerella.0962b75ed8d3c13fcf66a3c86a0128c9	0	0.000477099	0.0364297	0.645901	0.840627	0.999457
Bacteria.Proteobacteria.Gammaproteobacteria.Aeromonadales.Aeromonadaceae.Aeromonas.6570e98f6d39bacffe712be49da85a72	0.00114301	0.00617305	0.641988	-0.269027	0.900061	0.999457
Bacteria.Proteobacteria.Gammaproteobacteria.Alteromonadales.[Chromatiaceae].Alkalimonas.9a885de364c204eb310fb018084e5357	0	0.00035014	0.0561886	0.708595	0.825396	0.999457
Bacteria.Proteobacteria.Gammaproteobacteria.Alteromonadales.[Chromatiaceae].Rheinheimera.93ae84b3c018da26ddccf0f1d9018bc0	0.00095057	0.000502008	0.136771	1.32739	0.679146	0.999457
Bacteria.Proteobacteria.Gammaproteobacteria.Pasteurellales.Pasteurellaceae.Bibersteinia.47721d1f56a0b9265e964921aa2248fb	0.000429185	0	0.0469057	1.14886	0.72054	0.999457
Bacteria.Proteobacteria.Gammaproteobacteria.Pasteurellales.Pasteurellaceae.Mannheimia.26e5e0fa319e12161f3374cb4ad84de4	0	0.000623219	0.0545565	0.390619	0.903203	0.999457
Bacteria.Proteobacteria.Gammaproteobacteria.Pseudomonadales.Moraxellaceae.Psychrobacter.33d52877b54e4de27599aa035dfe8e9e	0	0.00652773	0.422028	-1.1936	0.683149	0.999457
Bacteria.Proteobacteria.Gammaproteobacteria.Pseudomonadales.Moraxellaceae.Moraxella.6a46bdb51712191a1737a806d2d6d44b	0	0.000121832	0.0193384	0.771288	0.810231	0.999457
Bacteria.Proteobacteria.Gammaproteobacteria.Pseudomonadales.Moraxellaceae.Enhydrobacter.04a75f1199d1bc6b58d19dd8aeb24520	0.00185448	0.0170021	1.94891	-1.38908	0.380776	0.999457
Bacteria.Proteobacteria.Gammaproteobacteria.Xanthomonadales.Sinobacteraceae.Hydrocarboniphaga.30193596fa89c079c7ef27a313f0cfa2	0	0.000852827	0.0615617	0.390619	0.903203	0.999457
Bacteria.Proteobacteria.Betaproteobacteria.Burkholderiales.Oxalobacteraceae.Massilia.bad0c851088d436414a7f01b1aae88ef	0.00218659	0.00741662	0.336885	-0.650661	0.793693	0.999457
Bacteria.Proteobacteria.Betaproteobacteria.Burkholderiales.Oxalobacteraceae.Naxibacter.09a0f08c867a618fe1f41d44c5309916	0	0.000415007	0.0392137	0.518727	0.8717	0.999457
Bacteria.Proteobacteria.Betaproteobacteria.Rhodocyclales.Rhodocyclaceae.Denitromonas.d09cb5e8fc79f6c36c5e04949eea91ea	0	0.000784277	0.100317	0.324669	0.919483	0.999457
Bacteria.Proteobacteria.Betaproteobacteria.Neisseriales.Neisseriaceae.Neisseria.8bd8a20601c0703a841ecd04fc98a423	0.00230125	0.00319915	0.390534	1.70237	0.587492	0.999457
Bacteria.Proteobacteria.Betaproteobacteria.Burkholderiales.Comamonadaceae.Caldimonas.df31d9bfbcbe6c1df76c54fc5bdfe9fd	0	0.000106293	0.00679397	0.771288	0.810231	0.999457
Bacteria.Proteobacteria.Betaproteobacteria.Burkholderiales.Comamonadaceae.Pseudorhodoferax.c91780e779a75eaa398741394070e0cb	0	0.000675676	0.0691647	0.454674	0.887429	0.999457
Bacteria.Proteobacteria.Betaproteobacteria.Burkholderiales.Comamonadaceae.Pelomonas.76b2b01c1e8e2f60d543a7731c2d3a33	0	0.000600962	0.0563862	0.645901	0.840627	0.999457
Bacteria.Proteobacteria.Betaproteobacteria.Burkholderiales.Comamonadaceae.Aquamonas.95ee839040d18494facc49290e1b7b9d	0	0.000365497	0.0580152	0.645901	0.840627	0.999457
Bacteria.Proteobacteria.Betaproteobacteria.Burkholderiales.Oxalobacteraceae.Pseudoburkholderia.dc8a2f47b3d1dc2e1f5f805891976b29	0.00240754	0.00217827	0.482238	1.7338	0.547094	0.999457
Bacteria.Proteobacteria.Betaproteobacteria.Burkholderiales.Alcaligenaceae.Bordetella.6e1ee4ac952c619b04c1871f5497b94f	0	0.000275938	0.0600313	0.708595	0.825396	0.999457
Bacteria.Proteobacteria.Betaproteobacteria.Burkholderiales.Alcaligenaceae.Oligella.835f4386310acf7009fb699aa32f16cc	0	0.000478927	0.051282	0.582777	0.856022	0.999457
Bacteria.Proteobacteria.Deltaproteobacteria.Desulfovibrionales.Desulfomicrobiaceae.Desulfomicrobium.383ac7d70fbd66f6b03dbc0c8b97bbfc	0.00108303	0	0.170472	1.93952	0.545421	0.999457
Bacteria.Proteobacteria.Deltaproteobacteria.Desulfovibrionales.Desulfovibrionaceae.Desulfovibrio.54c75ff9808ad69261f196f3fa130b06	0	0.000380518	0.0383667	0.582777	0.856022	0.999457
Bacteria.Proteobacteria.Alphaproteobacteria.Sphingomonadales.Sphingomonadaceae.Sphingomonas.811a2147af838cdbe0b37ce420321721	0.00146806	0.00802541	0.900472	-0.535812	0.806262	0.999457
Bacteria.Proteobacteria.Alphaproteobacteria.Sphingomonadales.Sphingomonadaceae.Sphingobium.da8dbb9356ed5e68256a9c9ec39bdbdc	0	0.00170937	0.150025	0.12019	0.96732	0.999457
Bacteria.Proteobacteria.Alphaproteobacteria.Sphingomonadales.Sphingomonadaceae.Novosphingobium.36faca38e62a8e280ac588a2bd4c1eaf	0	0.0054983	0.592259	-1.59084	0.532627	0.999457
Bacteria.Proteobacteria.Alphaproteobacteria.Caulobacterales.Caulobacteraceae.Brevundimonas.4bb96d7ec191f9f114463f425bca5f72	0.00041841	0.0224505	0.28402	-0.119018	0.964511	0.999457
Bacteria.Proteobacteria.Alphaproteobacteria.Caulobacterales.Caulobacteraceae.Arthrospira.63fca616d2f61d5e4c5fe6abfac12ae0	0	0.000881072	0.158404	0.324669	0.919483	0.999457
Bacteria.Proteobacteria.Alphaproteobacteria.Rhizobiales.Beijerinckiaceae.Chelatococcus.62a8ccc4a0b25cb8d3b394789fb5cb3a	0	0.00017507	0.0280943	0.771288	0.810231	0.999457
Bacteria.Proteobacteria.Alphaproteobacteria.Rhizobiales.Methylobacteriaceae.Methylobacterium.13ef39327a9a40ce5f44f8b27db52c7c	0.00117057	0.0115332	1.07114	-1.13712	0.50283	0.999457
Bacteria.Proteobacteria.Alphaproteobacteria.Rhizobiales.Beijerinckiaceae.Salinarimonas.c351b5906708f6caefd52776179b46b5	0.000150602	0	0.0545797	0.98564	0.758938	0.999457
Bacteria.Proteobacteria.Alphaproteobacteria.Rhodobacterales.Rhodobacteraceae.Haematobacter.63f023ad464aa1abe0c45ecb0b9fdc37	0	0.00415312	0.653621	-1.67661	0.540036	0.999457
Bacteria.Proteobacteria.Alphaproteobacteria.Rhizobiales.Phyllobacteriaceae.Aquamicrobium.fb73015535cf8463efbc5c960778979d	0	0.00064433	0.0920541	0.454674	0.887429	0.999457
Bacteria.Proteobacteria.Alphaproteobacteria.Rhizobiales.Bartonellaceae.Bartonella.3fbb76335551166a44f32d2a1cdb6bd3	0.000280899	0	0.0348087	1.14886	0.72054	0.999457
Bacteria.Proteobacteria.Alphaproteobacteria.Rhizobiales.Rhizobiaceae.Rhizobium.d201ef05844489782f0eebffc3f14194	0.02154	0.035109	2.80565	-0.698108	0.768662	0.999457
Bacteria.Proteobacteria.Alphaproteobacteria.Rhizobiales.Methylocystaceae.Pleomorphomonas.bd0420d0a56d9afa882a42acdffe50b1	0	0.000251004	0.0290104	0.708595	0.825396	0.999457
Bacteria.Proteobacteria.Alphaproteobacteria.Rhodospirillales.Acetobacteraceae.Roseomonas.2ef96f4d19cfd273e3494f6b373fae32	0.000214592	0	0.0234528	0.98564	0.758938	0.999457
Bacteria.Proteobacteria.Alphaproteobacteria.Rhodospirillales.Rhodospirillaceae.Enhydrobacter.e2794bdd48f50d41997664da06f444a2	0.00027933	0	0.0551388	1.14886	0.72054	0.999457
Bacteria.Bacteroidetes.Cytophagia.Cytophagales.Flammeovirgaceae.Marinoscillum.b888c128917c9e774de7aea72ee637fe	0	0.000121832	0.0193384	0.771288	0.810231	0.999457
Bacteria.Bacteroidetes.Sphingobacteriia.Sphingobacteriales.Sphingobacteriaceae.Mucilaginibacter.cef94d778253d70f69b517b478d0ccd2	0	0.0032345	0.232426	-0.579472	0.856749	0.999457
Bacteria.Bacteroidetes.Sphingobacteriia.Sphingobacteriales.Sphingobacteriaceae.Pedobacter.0e8209d368832bd8ba51e902c0ae75cb	0	0.00225841	0.253305	-0.385373	0.893854	0.999457
Bacteria.Bacteroidetes.[Saprospirae].[Saprospirales].Chitinophagaceae.Terrimonas.323fc0a5a127cdc83d9171a27b93156b	0.000361011	0.000376506	0.10034	0.960779	0.764807	0.999457
Bacteria.Bacteroidetes.[Saprospirae].[Saprospirales].Chitinophagaceae.Ferruginibacter.133ed11d20137bb87a99f9fb3d1aad51	0	0.000413907	0.0900469	0.645901	0.840627	0.999457
Bacteria.Bacteroidetes.[Saprospirae].[Saprospirales].Chitinophagaceae.Parasegitibacter.39bd57cfd1ed69dea62041310cb90b39	0	0.000243665	0.0386768	0.708595	0.825396	0.999457
Bacteria.Bacteroidetes.Bacteroidia.Bacteroidales.Rikenellaceae.Alistipes.b61cbccae82bfeb94bc752b6c1efe1ba	0.000643777	0	0.0703585	1.32092	0.680792	0.999457
Bacteria.Bacteroidetes.Bacteroidia.Bacteroidales.Porphyromonadaceae.Petrimonas.5bcabcb76434efbb4a07c905e9f8c947	0	0.000502008	0.0580208	0.582777	0.856022	0.999457
Bacteria.Bacteroidetes.Bacteroidia.Bacteroidales.Porphyromonadaceae.Macellibacteroides.b7972cec4a1f081c7dd2bb2e87160853	0.00133779	0	0.129915	2.09229	0.514074	0.999457
Bacteria.Bacteroidetes.Bacteroidia.Bacteroidales.Porphyromonadaceae.Porphyromonas.9e06ff8f82499e1f457e55e8a7157d0d	0	0.00631601	0.551116	-1.51876	0.55022	0.999457
Bacteria.Bacteroidetes.Bacteroidia.Bacteroidales.[Barnesiellaceae].Barnesiella.610adc0266739346ef2158575b8e7ff8	0	0.00108831	0.0453621	0.390619	0.903203	0.999457
Bacteria.Bacteroidetes.Bacteroidia.Bacteroidales.Prevotellaceae.Prevotella.7e1889484b65930b1ab3447bf3b0b64c	0.00993837	0.128278	16.6681	-2.4374	0.0286269	0.999457
Bacteria.Bacteroidetes.Bacteroidia.Bacteroidales.[Paraprevotellaceae].[Prevotella].15a3b1db98e2773a35c66e3c89fc4069	0	0.000925851	0.12013	0.582777	0.856022	0.999457
Bacteria.Bacteroidetes.Bacteroidia.Bacteroidales.Marinilabiaceae.Cytophaga.08e5996d843b3203b06163edc542cdef	0	0.00421438	0.442465	-1.23176	0.672918	0.999457
Bacteria.Bacteroidetes.Bacteroidia.Bacteroidales.Bacteroidaceae.Bacteroides.eae0738ba858df2d22433de0913bc58c	0.00150215	0.0091971	0.59963	0.12887	0.957153	0.999457
Bacteria.Bacteroidetes.Flavobacteriia.Flavobacteriales.Flavobacteriaceae.Flavobacterium.c61e30bd9f193f50740645598d547974	0	0.000270563	0.0248898	0.708595	0.825396	0.999457
Bacteria.Bacteroidetes.Flavobacteriia.Flavobacteriales.[Weeksellaceae].Weeksella.6bbbc5eb701e9cccf8a563933617d363	0.000137741	0	0.0545797	0.98564	0.758938	0.999457
Bacteria.Bacteroidetes.Flavobacteriia.Flavobacteriales.[Weeksellaceae].Wautersiella.624c60c2a2416f4f428b84f9588f337d	0	0.000548246	0.0559945	0.582777	0.856022	0.999457
Bacteria.Bacteroidetes.Flavobacteriia.Flavobacteriales.[Weeksellaceae].Elizabethkingia.a68f1205d4074f8928125564ed7681d2	0.000318246	0.0381213	2.73993	-3.40337	0.0427181	0.999457
Bacteria.[Thermi].Deinococci.Deinococcales.Trueperaceae.Truepera.bf991db3249937049e80d12840efa7dc	0	0.000689147	0.0907251	0.390619	0.903203	0.999457
Bacteria.Firmicutes.Clostridia.Clostridiales.[Tissierellaceae].Finegoldia.8dc4520cb0b6df47a8b7d0832a252cb0	0.000781518	0.016345	1.18279	-1.69209	0.44593	0.999457
Bacteria.Firmicutes.Clostridia.Clostridiales.[Tissierellaceae].Peptoniphilus.244197657e8c6f47a0b10a5ec21b4ee2	0	0.012438	1.57864	-2.96954	0.235024	0.999457
Bacteria.Firmicutes.Clostridia.Clostridiales.[Tissierellaceae].WAL_1855D.edeafad97b76486737453d6cd2ca9841	0	0.000107388	0.0153423	0.771288	0.810231	0.999457
Bacteria.Firmicutes.Clostridia.Clostridiales.Peptostreptococcaceae.Clostridium.6eb3f747505b027607654373c88891d2	0	0.00308986	0.131568	0.390619	0.903203	0.999457
Bacteria.Firmicutes.Clostridia.Clostridiales.Peptostreptococcaceae.[Clostridium].1a0b1855c9f3ea22a57f898b23e3de48	0.000837989	0	0.059157	1.5651	0.625844	0.999457
Bacteria.Firmicutes.Clostridia.Clostridiales.Clostridiaceae.Clostridium.bf724e4d31a620d070cf4d7dde605181	0.000858369	0	0.0938113	1.50698	0.638754	0.999457
Bacteria.Firmicutes.Clostridia.Clostridiales.Ruminococcaceae.Sporobacter.6f26f9a78c7992c88f7e8d96b645bff5	0	0.00217662	0.0907243	0.0811339	0.979846	0.999457
Bacteria.Firmicutes.Clostridia.Clostridiales.Lachnospiraceae.Roseburia.004ca9d14962355f711fea88ca840425	0	0.0012424	0.163036	0.119846	0.969774	0.999457
Bacteria.Firmicutes.Clostridia.Clostridiales.Lachnospiraceae.Bacteroides.b3dbccceff0f44f865957eb9ff5fecb9	0	0.000733568	0.0626013	0.518727	0.8717	0.999457
Bacteria.Firmicutes.Clostridia.Clostridiales.Lachnospiraceae.Butyrivibrio.911675f4d32e3554da9c75204456b761	0.00107296	0	0.117264	1.70669	0.594858	0.999457
Bacteria.Firmicutes.Clostridia.Clostridiales.Lachnospiraceae.Clostridium.853bc0df4f511a52189a133d996cd9fb	0.00063839	0.00222613	0.312918	-0.0723884	0.980074	0.999457
Bacteria.Firmicutes.Clostridia.Clostridiales.Lachnospiraceae.Ruminococcus.81fb9360f5e5db4f7d99b5f099c691bf	0	0.00166391	0.151012	-0.103445	0.974303	0.999457
Bacteria.Firmicutes.Clostridia.Clostridiales.Lachnospiraceae.Robinsoniella.e7a216fb20e1ac5d7d3518ee6ae12c30	0	0.00160256	0.150363	0.324669	0.919483	0.999457
Bacteria.Firmicutes.Clostridia.Clostridiales.Lachnospiraceae.Dorea.63dd3986b722a781191c5053e5b46443	0.000429185	0.00459495	0.45001	-0.838456	0.757341	0.999457
Bacteria.Firmicutes.Clostridia.Clostridiales.Ruminococcaceae.Ethanoligenens.49604f52e41c084476c1e4f2574206dd	0	0.00100402	0.116042	0.324669	0.919483	0.999457
Bacteria.Firmicutes.Clostridia.Clostridiales.Ruminococcaceae.Gemmiger.5a6289b8068d8b7722dafb10cc3d0b76	0	0.000496032	0.0557038	0.582777	0.856022	0.999457
Bacteria.Firmicutes.Clostridia.Clostridiales.Ruminococcaceae.Faecalibacterium.11b6e085e506436abb45e998147d138a	0.000137363	0.0034488	0.453661	-0.875986	0.710311	0.999457
Archaea.Euryarchaeota.Methanobacteria.Methanobacteriales.Methanobacteriaceae.Methanobrevibacter.494e7cb040a86bd3d91e7066a86d06d0	0	0.00124008	0.139259	0.188297	0.953249	0.999457
Bacteria.Cyanobacteria.Oscillatoriophycideae.Oscillatoriales.Phormidiaceae.Arthrospira.330b2967113c7906096404aafd0b391d	0	0.000293427	0.0250405	0.708595	0.825396	0.999457
Bacteria.Cyanobacteria.Nostocophycideae.Nostocales.Scytonemataceae.Brasilonema.2f2a9e29fe8b3a00cd0f385641035be4	0	0.000248016	0.0278519	0.708595	0.825396	0.999457
Bacteria.Cyanobacteria.Oscillatoriophycideae.Chroococcales.Xenococcaceae.Chroococcidiopsis.a5c805d36f3bc83b77255f4483e66891	0	0.00158093	0.129395	0.119783	0.970249	0.999457
Bacteria.Firmicutes.Clostridia.Clostridiales.Veillonellaceae.Selenomonas.8296bb5a87fed6f75327fb4a31fd3ac9	0.000613497	0.00017507	0.0837981	1.44429	0.652773	0.999457
Bacteria.Firmicutes.Clostridia.Clostridiales.Veillonellaceae.Mitsuokella.b1e26d0956676effc6f659d132ed4dff	0	0.000992063	0.111408	0.324669	0.919483	0.999457
Bacteria.Firmicutes.Clostridia.Clostridiales.Veillonellaceae.Anaerosinus.5c76bdf5d4af155634aae61fcd866804	0.00293296	0.0173605	1.18772	-2.57273	0.294856	0.999457
Bacteria.Firmicutes.Clostridia.Clostridiales.Veillonellaceae.Megasphaera.eb7176dbda53db07c5bcd55baebd6889	0	0.00719688	0.0787262	0.324669	0.919483	0.999457
Bacteria.Firmicutes.Clostridia.Clostridiales.Veillonellaceae.Succinispira.65654770a942b3ed73ed3001ce78e695	0	0.000496032	0.0557038	0.582777	0.856022	0.999457
Bacteria.Firmicutes.Erysipelotrichi.Erysipelotrichales.Erysipelotrichaceae.[Eubacterium].c54bf70908b1db0f88baa5d62cbedb52	0	0.000429553	0.0613694	0.582777	0.856022	0.999457
Bacteria.Firmicutes.Bacilli.Bacillales.Alicyclobacillaceae.Alicyclobacillus.b4cdd4e48663cce08cc2e5bb062b9118	0	0.000135281	0.0124449	0.771288	0.810231	0.999457
Bacteria.Actinobacteria.Coriobacteriia.Coriobacteriales.Coriobacteriaceae.Collinsella.24a243c38014e2daa1fadd8c23ec578f	0	0.00286943	0.150455	-0.188128	0.953283	0.999457
Bacteria.Actinobacteria.Acidimicrobiia.Acidimicrobiales.C111.Ilumatobacter.dc11664bc5502bf01944fb43b8f929b0	0	0.000681001	0.113428	0.454674	0.887429	0.999457
Bacteria.Actinobacteria.Actinobacteria.Actinomycetales.ACK-M1.Planktophila.2979c053db11fc54c100e34504aabf25	0	0.000236742	0.0663501	0.708595	0.825396	0.999457
Bacteria.Actinobacteria.Actinobacteria.Actinomycetales.Propionibacteriaceae.Propionibacterium.355c3240c6a55a96ef70dd3701c96392	0	0.000575611	0.0888666	0.390619	0.903203	0.999457
Bacteria.Actinobacteria.Actinobacteria.Actinomycetales.Nocardioidaceae.Nocardioides.17aeac58e49d35ef6654fa2722a1bce2	0.000501672	0.00383461	0.50989	-0.19482	0.929728	0.999457
Bacteria.Actinobacteria.Actinobacteria.Actinomycetales.Nocardioidaceae.Marmoricola.fe49d3c354c2937d2af2b5d1091e061b	0	0.000400641	0.0358468	0.771288	0.810231	0.999457
Bacteria.Actinobacteria.Actinobacteria.Actinomycetales.Streptomycetaceae.Streptomyces.e077f7faf48e5aad47b13af6835db552	0	0.00233427	0.18714	-0.226242	0.943831	0.999457
Bacteria.Actinobacteria.Actinobacteria.Actinomycetales.Frankiaceae.Actinomycetales.9b40d34ef71f7d9d56ca7891e3f4e043	0	8.37e-05	0.009703	0.771288	0.810231	0.999457
Bacteria.Actinobacteria.Actinobacteria.Actinomycetales.Pseudonocardiaceae.Actinomycetospora.fd5c732c79ff61262c7555ee3ba719d3	0.000140449	0.00497945	0.234856	0.16518	0.950501	0.999457
Bacteria.Actinobacteria.Actinobacteria.Actinomycetales.Intrasporangiaceae.Ornithinimicrobium.6931a2d4d5eff1731b7185469c077bca	0	0.00647784	0.636989	-1.69598	0.507435	0.999457
Bacteria.Actinobacteria.Actinobacteria.Actinomycetales.Micrococcaceae.Rothia.a38d5871c6a2558a5483e235b81ccea7	0	0.000225225	0.0230549	0.708595	0.825396	0.999457
Bacteria.Actinobacteria.Actinobacteria.Actinomycetales.Micrococcaceae.Kocuria.e783488708509f26ddc8c0f8bc697020	0.00477248	0.0162324	2.12364	-0.127521	0.918733	0.999457
Bacteria.Actinobacteria.Actinobacteria.Actinomycetales.Micrococcaceae.Micrococcus.ef366129b50b5ea424db24e708a75ba3	0	0.00815795	0.587344	-1.59629	0.503027	0.999457
Bacteria.Actinobacteria.Actinobacteria.Actinomycetales.Micrococcaceae.Arthrobacter.6b780e361cfc5f06def718518324bdcb	0.00119403	0.0164055	0.787218	-0.955693	0.552563	0.999457
Bacteria.Actinobacteria.Actinobacteria.Actinomycetales.Microbacteriaceae.Leifsonia.009c0490f447bd0906ccd1112dfc0e41	0.00041841	0.00313755	0.0432803	1.14886	0.72054	0.999457
Bacteria.Actinobacteria.Actinobacteria.Actinomycetales.Actinomycetaceae.Actinomyces.ec77483799b52344af6428d79ab9719c	0	0.0123769	1.10175	-2.45724	0.286934	0.999457
Bacteria.Actinobacteria.Actinobacteria.Bifidobacteriales.Bifidobacteriaceae.Gardnerella.25d1232b636c9951b58814d31052467f	0	0.0050426	0.253704	-0.643865	0.825175	0.999457
Bacteria.Actinobacteria.Actinobacteria.Bifidobacteriales.Bifidobacteriaceae.Bifidobacterium.8d29a4b0e2aa4632d98d3b302ea9ef31	0	0.00162416	0.143675	-0.0935941	0.97675	0.999457
Bacteria.Actinobacteria.Actinobacteria.Actinomycetales.Brevibacteriaceae.Brevibacterium.787f39d82237e5b0119f08039824d15e	0	0.00329861	0.101845	0.136643	0.966064	0.999457
Bacteria.Actinobacteria.Actinobacteria.Actinomycetales.Geodermatophilaceae.Blastococcus.221314190169989a3def755094c08977	0.000643777	0.00261962	0.328357	0.00904058	0.997305	0.999457
Bacteria.Actinobacteria.Actinobacteria.Actinomycetales.Dietziaceae.Dietzia.611f22c4148835b3347e113a625e4b3f	0.00150688	0.00776384	0.489365	0.183162	0.935262	0.999457
Bacteria.Actinobacteria.Actinobacteria.Actinomycetales.Nocardiaceae.Rhodococcus.cfe98556a6250bcf6e8e6a65edc2cdee	0	9.3e-05	0.00819277	0.771288	0.810231	0.999457
Bacteria.Actinobacteria.Actinobacteria.Actinomycetales.Gordoniaceae.Millisia.0eec78dd11e070d018fcebdf77e068f7	0	0.00141723	0.0935366	0.188297	0.953249	0.999457
Bacteria.Actinobacteria.Actinobacteria.Actinomycetales.Nakamurellaceae.Nakamurella.b4a03c84c369c0f8f4f304bd52ce07b1	0	0.000868056	0.0974816	0.390619	0.903203	0.999457
Bacteria.Actinobacteria.Thermoleophilia.Solirubrobacterales.Solirubrobacteraceae.Solirubrobacter.4807e7d5ba96669a68d4c064e32816cc	0.00134328	0.00189931	0.293557	0.836935	0.788777	0.999457
Bacteria.Actinobacteria.Thermoleophilia.Gaiellales.Gaiellaceae.Gaiella.82756419dd951356d220f635a03031fd	0	0.000517987	0.0601555	0.708595	0.825396	0.999457
Bacteria.Firmicutes.Bacilli.Bacillales.[Thermicanaceae].Thermicanus.0e8e8013a43f936ffdbcabe02759c427	0	0.000801282	0.0663717	0.454674	0.887429	0.999457
Bacteria.Firmicutes.Bacilli.Bacillales.Paenibacillaceae.Paenibacillus.aa3537df624513208d209d3f6cb35b02	0	0.000411184	0.0447254	0.645901	0.840627	0.999457
Bacteria.Firmicutes.Bacilli.Bacillales.Planococcaceae.Bacillus.6d350e1fecb972294579217f2a162e80	0.000180505	0	0.028412	0.98564	0.758938	0.999457
Bacteria.Firmicutes.Bacilli.Bacillales.Listeriaceae.Brochothrix.ecfe86307ef82349547adb9ca8c879df	0	0.00792802	0.241634	-0.37329	0.905117	0.999457
Bacteria.Firmicutes.Bacilli.Bacillales.Bacillaceae.Marinococcus.a0f15be3bc15acedc9fb2f5909896cc8	0	8.37e-05	0.009703	0.771288	0.810231	0.999457
Bacteria.Firmicutes.Bacilli.Bacillales.Planococcaceae.Kurthia.c740f718c86d6e26b1435cabd580ffd7	0.00100334	0	0.097436	1.86609	0.560803	0.999457
Bacteria.Firmicutes.Bacilli.Bacillales.Bacillaceae.Bacillus.9090ad6d4e6d41b91d1e310fbe1e6aa4	0.000811607	0.00362885	0.429135	-0.295979	0.900862	0.999457
Bacteria.Firmicutes.Bacilli.Lactobacillales.Aerococcaceae.Alloiococcus.fdb77967f908752412f454de1ff74bbf	0	0.00207583	0.251012	-0.050429	0.987472	0.999457
Bacteria.Firmicutes.Bacilli.Lactobacillales.Aerococcaceae.Abiotrophia.4bf54a44bb85f2739e3520ace97b4eae	0	0.00371659	0.346876	-0.394271	0.890098	0.999457
Bacteria.Firmicutes.Bacilli.Lactobacillales.Streptococcaceae.Streptococcus.d3d16f870dfadf956370c3aba43e4098	0.00379132	0.0730926	6.88839	-1.88046	0.0323462	0.999457
Bacteria.Firmicutes.Bacilli.Lactobacillales.Aerococcaceae.Granulicatella.ff7d4bee8575f9b437d41aecf5fb05fc	0	0.000400641	0.0331859	0.645901	0.840627	0.999457
Bacteria.Firmicutes.Bacilli.Lactobacillales.Aerococcaceae.Lacticigenium.9a79aa9fa61c27c45863d70e5de6d2ba	0	0.0062052	0.0393631	0.582777	0.856022	0.999457
Bacteria.Firmicutes.Bacilli.Lactobacillales.Leuconostocaceae.Weissella.620edd2956ede81b09704c3f3f5657fa	0.000361011	0.00134958	0.183669	0.240478	0.93951	0.999457
Bacteria.Firmicutes.Bacilli.Lactobacillales.Leuconostocaceae.Oenococcus.e16be6de6436803e3b84a5b5a648bb17	0	0.000356125	0.0311751	0.582777	0.856022	0.999457
Bacteria.Firmicutes.Bacilli.Lactobacillales.Lactobacillaceae.Lactobacillus.6658f31f4b3defccbc037636b27672e0	0.000575603	0.00240532	0.294668	-0.00170015	0.999457	0.999457
Bacteria.Firmicutes.Bacilli.Bacillales.Planococcaceae.Staphylococcus.ed731f07a20332ea13fc88a1752b45ed	0	0.00593387	0.527016	-1.41665	0.601841	0.999457
Bacteria.Firmicutes.Bacilli.Bacillales.Staphylococcaceae.Macrococcus.65eb5f66ec11cb6fcb1bb3d469c9152b	0.000214592	0.00601765	0.59857	-1.45024	0.519611	0.999457
Bacteria.Firmicutes.Bacilli.Bacillales.Staphylococcaceae.Staphylococcus.10fb2f2d675388a8c991c2a4431bdfaa	0	0.000968567	0.0691474	0.582777	0.856022	0.999457

## Sheet: 7_16S_taxa_dTBLs_dL2_vs_dL3
Taxa	Abundance in dL3	Abundance in dL2	baseMean	Log fold-change	p-value	Adj. p-val
Bacteria.Firmicutes.Bacilli.Lactobacillales.Streptococcaceae.Streptococcus.d3d16f870dfadf956370c3aba43e4098	0.00379132	0.172767	20.8506	-4.76623	6.33e-09	8.23e-07
Bacteria.Bacteroidetes.Bacteroidia.Bacteroidales.Prevotellaceae.Prevotella.040b1ab5b026b8b7c77744cb29c6ca7b	0.00993837	0.158808	19.9005	-3.87187	2.49e-06	0.000161735
Bacteria.Firmicutes.Clostridia.Clostridiales.Veillonellaceae.Anaerosinus.5c76bdf5d4af155634aae61fcd866804	0.00293296	0.0652222	8.55878	-4.84028	4.73e-05	0.00205177
Bacteria.Actinobacteria.Actinobacteria.Actinomycetales.Corynebacteriaceae.Corynebacterium.8a82820cc1075421faf42ec4285f23b3	0.00808613	0.0752383	7.41273	-2.72423	0.000152444	0.00495444
Bacteria.Proteobacteria.Betaproteobacteria.Neisseriales.Neisseriaceae.Neisseria.4ef3d05269c762db631f033432d48b23	0.00230125	0.0466846	6.9974	-4.44821	0.000954481	0.0248165
Bacteria.Actinobacteria.Actinobacteria.Actinomycetales.Mycobacteriaceae.Mycobacterium.403432032a5dcac89b8cb1610988f69e	0.896496	0.114558	209.969	2.9554	0.00130418	0.0282573
Bacteria.Actinobacteria.Actinobacteria.Actinomycetales.Micrococcaceae.Kocuria.f280486137effb019545eb4d700ff8fd	0.00477248	0.032604	4.74466	-2.58286	0.00507067	0.0941696
Bacteria.Proteobacteria.Gammaproteobacteria.Pseudomonadales.Moraxellaceae.Enhydrobacter.04a75f1199d1bc6b58d19dd8aeb24520	0.00185448	0.0199554	2.56208	-3.05154	0.014826	0.240923
Bacteria.Actinobacteria.Actinobacteria.Actinomycetales.Actinomycetaceae.Actinomyces.9c1454b23d7b9e86ad391e0b238ee420	0	0.00902421	1.11152	-3.54932	0.0179531	0.259322
Bacteria.Bacteroidetes.Flavobacteriia.Flavobacteriales.[Weeksellaceae].Elizabethkingia.a68f1205d4074f8928125564ed7681d2	0.000318246	0.022314	1.32507	-3.37839	0.0418404	0.543925
Bacteria.Bacteroidetes.Bacteroidia.Bacteroidales.Bacteroidaceae.Bacteroides.1687ff6cb098eb6ba9d74ea55829d76a	0.00150215	0.010243	1.28987	-2.3416	0.090313	0.978391
Bacteria.Firmicutes.Clostridia.Clostridiales.Ruminococcaceae.Faecalibacterium.b167ad9fdf6c2158e6e90d7756049242	0.000137363	0.00847105	0.859961	-2.96814	0.0873325	0.978391
Bacteria.Proteobacteria.Epsilonproteobacteria.Campylobacterales.Campylobacteraceae.Campylobacter.bc2e91c177dcf042f2ecde858c2e64ed	0	0.00339921	0.518362	-2.40936	0.105427	0.979269
Bacteria.Proteobacteria.Gammaproteobacteria.Cardiobacteriales.Cardiobacteriaceae.Cardiobacterium.c1c8943f44cfa2ba3736b0e2d75f2b16	0	0.000807103	0.0820399	-0.554461	0.851182	0.979269
Bacteria.Proteobacteria.Gammaproteobacteria.Oceanospirillales.Oceanospirillaceae.Marinomonas.49dbc423c4a7da144b5eeb37d9d05733	0	0.0011544	0.10921	-0.554461	0.851182	0.979269
Bacteria.Proteobacteria.Gammaproteobacteria.Alteromonadales.Alteromonadaceae.Gilvimarinus.8a39762f017fe61c86fa67a28e091c27	0	0.000193573	0.0186031	-0.132646	0.964203	0.979269
Bacteria.Proteobacteria.Gammaproteobacteria.Enterobacteriales.Enterobacteriaceae.Pseudomonas.fb3776fbe0b3be104a6d5476cc55264d	0.000361011	0.00106465	0.171109	-0.395374	0.888467	0.979269
Bacteria.Proteobacteria.Gammaproteobacteria.Pseudomonadales.Pseudomonadaceae.Pseudomonas.61c2ae6c1ea8ff91b08ae219ca4480d1	0.00137849	0.00462372	0.555123	-0.552548	0.771682	0.979269
Bacteria.Proteobacteria.Gammaproteobacteria.Oceanospirillales.Halomonadaceae.Halomonas.508a0422d2d6020fa33e62858488a797	0.00343811	0.000460087	0.55347	2.20456	0.31214	0.979269
Bacteria.Proteobacteria.Gammaproteobacteria.Pseudomonadales.Moraxellaceae.Acinetobacter.f3b178d47f09d2c2fc4e2d211747bfe8	0.00182283	0.00886113	1.41707	-0.366843	0.826633	0.979269
Bacteria.Proteobacteria.Gammaproteobacteria.Pseudomonadales.Moraxellaceae.Alkanindiges.1be3a3951111e62b3bbd7e0dd52b6da0	0.000415553	0.00281173	0.322053	-0.796106	0.719009	0.979269
Bacteria.Proteobacteria.Gammaproteobacteria.Enterobacteriales.Enterobacteriaceae.Pantoea.5a90106a71eb6b7dd8fae5fb1b8967c8	0.00968158	0.00326991	0.248534	-0.491609	0.85727	0.979269
Bacteria.Proteobacteria.Gammaproteobacteria.Enterobacteriales.Enterobacteriaceae.Budvicia.f309ea1ec8287026c5e76ba862929f85	0.000150602	0	0.0565104	0.15978	0.956884	0.979269
Bacteria.Proteobacteria.Gammaproteobacteria.Enterobacteriales.Enterobacteriaceae.Proteus.ff879f5418ebe06779501b57b52cb944	0.000291545	0	0.0260824	0.319378	0.913933	0.979269
Bacteria.Proteobacteria.Gammaproteobacteria.Aeromonadales.Aeromonadaceae.Aeromonas.6570e98f6d39bacffe712be49da85a72	0.00114301	0.000345066	0.165785	1.06065	0.710651	0.979269
Bacteria.Proteobacteria.Gammaproteobacteria.Alteromonadales.[Chromatiaceae].Rheinheimera.208aa356da260d9027f7dfc6b49af54d	0.00095057	0.00276454	0.238315	-0.260091	0.924788	0.979269
Bacteria.Proteobacteria.Gammaproteobacteria.Pasteurellales.Pasteurellaceae.Bibersteinia.47721d1f56a0b9265e964921aa2248fb	0.000429185	0	0.0466341	0.319378	0.913933	0.979269
Bacteria.Proteobacteria.Gammaproteobacteria.Pasteurellales.Pasteurellaceae.Actinobacillus.1f49a099a6d886e26ffc43d09e9a8baa	0	0.0164945	0.379924	-1.96516	0.251103	0.979269
Bacteria.Proteobacteria.Gammaproteobacteria.Pasteurellales.Pasteurellaceae.Haemophilus.0731438b2c4dea5aa1e27215a00c4b18	0	0.000204374	0.0300206	-0.132646	0.964203	0.979269
Bacteria.Proteobacteria.Gammaproteobacteria.Pasteurellales.Pasteurellaceae.Mannheimia.26e5e0fa319e12161f3374cb4ad84de4	0	0.000702646	0.10001	-0.407442	0.890356	0.979269
Bacteria.Proteobacteria.Gammaproteobacteria.Pseudomonadales.Moraxellaceae.Psychrobacter.25b7ea1bc3435d8c82c08fbc2bba87ac	0	0.00776381	0.427427	-2.21815	0.396609	0.979269
Bacteria.Proteobacteria.Betaproteobacteria.Burkholderiales.Oxalobacteraceae.Massilia.bad0c851088d436414a7f01b1aae88ef	0.00218659	0.00107735	0.112633	-0.709997	0.81012	0.979269
Bacteria.Proteobacteria.Betaproteobacteria.Rhodocyclales.Rhodocyclaceae.Azoarcus.1cee8856fa2a7b2394bfa0e10320ebe2	0	0.000605327	0.0615299	-0.407442	0.890356	0.979269
Bacteria.Proteobacteria.Betaproteobacteria.Burkholderiales.Comamonadaceae.Pseudacidovorax.6f7a869f979ce3e7117fac735b26803a	0	0.00107735	0.112633	-0.709997	0.81012	0.979269
Bacteria.Proteobacteria.Betaproteobacteria.Burkholderiales.Comamonadaceae.Pelomonas.84ba35e25cad06ec254afbeb1140da5e	0	0.000387147	0.0372062	-0.270044	0.927201	0.979269
Bacteria.Proteobacteria.Betaproteobacteria.Burkholderiales.Comamonadaceae.Acidovorax.e9f66c7d13ad28d7220fb8754c6512f2	0	0.00110742	0.0505823	-0.536056	0.856069	0.979269
Bacteria.Proteobacteria.Betaproteobacteria.Burkholderiales.Comamonadaceae.Sphaerotilus.f8fa95e2e3957bf2e208267178cc2750	0	0.000190476	0.0467533	-0.132646	0.964203	0.979269
Bacteria.Proteobacteria.Betaproteobacteria.Burkholderiales.Comamonadaceae.Leptothrix.3b209370a9047dfdf3663a7822a11e18	0	0.000817494	0.120082	-0.554461	0.851182	0.979269
Bacteria.Proteobacteria.Betaproteobacteria.Burkholderiales.Oxalobacteraceae.Pseudoburkholderia.dc8a2f47b3d1dc2e1f5f805891976b29	0.00240754	0.00029036	0.357968	1.87289	0.481313	0.979269
Bacteria.Proteobacteria.Betaproteobacteria.Burkholderiales.Alcaligenaceae.Bordetella.6e1ee4ac952c619b04c1871f5497b94f	0	0.000213538	0.0192242	-0.132646	0.964203	0.979269
Bacteria.Proteobacteria.Deltaproteobacteria.Desulfovibrionales.Desulfomicrobiaceae.Desulfomicrobium.383ac7d70fbd66f6b03dbc0c8b97bbfc	0.00108303	0	0.17847	1.05246	0.721454	0.979269
Bacteria.Proteobacteria.Alphaproteobacteria.Sphingomonadales.Sphingomonadaceae.Sphingomonas.59609ec055fcb073adc46793719455e4	0.00146806	0.00649396	0.282542	0.736655	0.763053	0.979269
Bacteria.Proteobacteria.Alphaproteobacteria.Sphingomonadales.Sphingomonadaceae.Sphingobium.da8dbb9356ed5e68256a9c9ec39bdbdc	0	0.00316659	0.321213	-1.84713	0.488454	0.979269
Bacteria.Proteobacteria.Alphaproteobacteria.Sphingomonadales.Sphingomonadaceae.Sphingosinicella.f922bb836523db0b8e265a464de54690	0	0.000230044	0.0309872	-0.132646	0.964203	0.979269
Bacteria.Proteobacteria.Alphaproteobacteria.Rhizobiales.Xanthobacteraceae.Xanthobacter.e4d4ae5548ed3f755d2448f46005f9b8	0	0.000206143	0.031402	-0.132646	0.964203	0.979269
Bacteria.Proteobacteria.Alphaproteobacteria.Caulobacterales.Caulobacteraceae.Asticcacaulis.31522f6854fcca3f25ad841060815407	0	0.00051573	0.0358593	-0.407442	0.890356	0.979269
Bacteria.Proteobacteria.Alphaproteobacteria.Caulobacterales.Caulobacteraceae.Brevundimonas.4bb96d7ec191f9f114463f425bca5f72	0.00041841	0.00296933	0.269013	-1.14961	0.640638	0.979269
Bacteria.Proteobacteria.Alphaproteobacteria.Caulobacterales.Caulobacteraceae.Caulobacter.f40e6f6aac5a8ed5e7d2bf9830b78040	0	0.000817494	0.120082	-0.554461	0.851182	0.979269
Bacteria.Proteobacteria.Alphaproteobacteria.Rhizobiales.Methylobacteriaceae.Methylobacterium.13ef39327a9a40ce5f44f8b27db52c7c	0.00117057	0.0142613	1.15312	-2.269	0.199482	0.979269
Bacteria.Proteobacteria.Alphaproteobacteria.Rhizobiales.Beijerinckiaceae.Salinarimonas.1110386d15af5352d0f3b2f705818ff3	0.000150602	0.00426175	0.400701	-1.77049	0.45969	0.979269
Bacteria.Proteobacteria.Alphaproteobacteria.Rhodobacterales.Rhodobacteraceae.Albidovulum.c4c78b8f20425db24e1528a9fb9b33c3	0	0.000218436	0.0249655	-0.132646	0.964203	0.979269
Bacteria.Proteobacteria.Alphaproteobacteria.Rhodobacterales.Rhodobacteraceae.Haematobacter.63f023ad464aa1abe0c45ecb0b9fdc37	0	0.000742305	0.0901555	-0.554461	0.851182	0.979269
Bacteria.Proteobacteria.Alphaproteobacteria.Rhizobiales.Bartonellaceae.Bartonella.3fbb76335551166a44f32d2a1cdb6bd3	0.000280899	0	0.0367083	0.319378	0.913933	0.979269
Bacteria.Proteobacteria.Alphaproteobacteria.Rhizobiales.Rhizobiaceae.Rhizobium.d201ef05844489782f0eebffc3f14194	0.02154	0.039174	1.57465	-0.641078	0.771075	0.979269
Bacteria.Proteobacteria.Alphaproteobacteria.Rhodospirillales.Acetobacteraceae.Roseomonas.2ef96f4d19cfd273e3494f6b373fae32	0.000214592	0	0.0233171	0.15978	0.956884	0.979269
Bacteria.Spirochaetes.Spirochaetes.Spirochaetales.Spirochaetaceae.Treponema.2ad42536fe00a05b1cea41505155c624	0	0.00106878	0.109715	-0.554461	0.851182	0.979269
Bacteria.Proteobacteria.Deltaproteobacteria.Bdellovibrionales.Bacteriovoracaceae.Peredibacter.d06059ceb1c28a33a47afb651b3721a4	0	0.000201776	0.02051	-0.132646	0.964203	0.979269
Bacteria.Proteobacteria.Alphaproteobacteria.Rhodospirillales.Rhodospirillaceae.Enhydrobacter.e2794bdd48f50d41997664da06f444a2	0.00027933	0	0.0574739	0.319378	0.913933	0.979269
Bacteria.Fusobacteria.Fusobacteriia.Fusobacteriales.Leptotrichiaceae.Streptobacillus.0d2daf82e641596d20fed7336278f7ab	0	0.00101448	0.124588	-0.708822	0.810429	0.979269
Bacteria.Lentisphaerae.[Lentisphaeria].Victivallales.Victivallaceae.Victivallis.d7aa7a0ff6365e77367c066ac870ed74	0	0.000436872	0.049931	-0.270044	0.927201	0.979269
Bacteria.Bacteroidetes.Sphingobacteriia.Sphingobacteriales.Sphingobacteriaceae.Pedobacter.fa739d49523dc3da5c9abb0ace7e345e	0	0.00058072	0.0558092	-0.407442	0.890356	0.979269
Bacteria.Bacteroidetes.[Saprospirae].[Saprospirales].Chitinophagaceae.Terrimonas.d52b5ca0165aa707171c6cccbb5e17c1	0.000361011	0	0.0594901	0.319378	0.913933	0.979269
Bacteria.Bacteroidetes.Bacteroidia.Bacteroidales.Porphyromonadaceae.Vestibaculum.e7f570372730567b27a0f790f81e24d0	0	0.00014518	0.0305325	-0.132646	0.964203	0.979269
Bacteria.Bacteroidetes.Bacteroidia.Bacteroidales.Porphyromonadaceae.Macellibacteroides.b7972cec4a1f081c7dd2bb2e87160853	0.00133779	0	0.152921	1.2975	0.660079	0.979269
Bacteria.Bacteroidetes.Bacteroidia.Bacteroidales.Porphyromonadaceae.Porphyromonas.9e06ff8f82499e1f457e55e8a7157d0d	0	0.00388734	0.761529	-2.98196	0.173846	0.979269
Bacteria.Bacteroidetes.Bacteroidia.Bacteroidales.[Paraprevotellaceae].[Prevotella].58c03b997c7a9aadbc28acca53358f8f	0	0.000445515	0.0535138	-0.270044	0.927201	0.979269
Bacteria.Bacteroidetes.Bacteroidia.Bacteroidales.[Paraprevotellaceae].Paraprevotella.a1990f8e646b1f0334707107b5e6b5de	0	0.000436872	0.049931	-0.270044	0.927201	0.979269
Bacteria.Bacteroidetes.Bacteroidia.Bacteroidales.Marinilabiaceae.Cytophaga.607e36b5b63248baca4e40611684b359	0	0.00505091	0.126623	-0.709997	0.81012	0.979269
Bacteria.Bacteroidetes.Flavobacteriia.Flavobacteriales.[Weeksellaceae].Weeksella.6bbbc5eb701e9cccf8a563933617d363	0.000137741	0	0.0565104	0.15978	0.956884	0.979269
Bacteria.Bacteroidetes.Flavobacteriia.Flavobacteriales.[Weeksellaceae].Wautersiella.624c60c2a2416f4f428b84f9588f337d	0	0.00151172	0.0559609	-0.554461	0.851182	0.979269
Bacteria.Bacteroidetes.Flavobacteriia.Flavobacteriales.[Weeksellaceae].Bergeyella.2e9f64ce9ec727ee1fde65c75aa71db7	0	0.00295568	0.296575	-1.69112	0.528371	0.979269
Bacteria.Firmicutes.Clostridia.Clostridiales.[Tissierellaceae].Finegoldia.8dc4520cb0b6df47a8b7d0832a252cb0	0.000781518	0.00777334	0.693297	-1.88766	0.310084	0.979269
Bacteria.Firmicutes.Bacilli.Haloplasmatales.Haloplasmataceae.Haloplasma.f602d6ff85ddf1bf0ee685e4f5912171	0	0.000215471	0.0225266	-0.132646	0.964203	0.979269
Bacteria.Firmicutes.Clostridia.Clostridiales.[Tissierellaceae].Peptoniphilus.244197657e8c6f47a0b10a5ec21b4ee2	0	0.0121948	0.373329	-2.03426	0.310613	0.979269
Bacteria.Firmicutes.Clostridia.Clostridiales.[Tissierellaceae].WAL_1855D.d9edfe40997a6da1040fecb878feb158	0	0.0002886	0.0273024	-0.132646	0.964203	0.979269
Bacteria.Firmicutes.Clostridia.Clostridiales.Peptostreptococcaceae.[Clostridium].1a0b1855c9f3ea22a57f898b23e3de48	0.000837989	0	0.0573446	0.674193	0.81946	0.979269
Bacteria.Firmicutes.Clostridia.Clostridiales.[Mogibacteriaceae].Mogibacterium.7f0b063ceb89803b6b52917d30b5555b	0	0.000384333	0.0371424	-0.270044	0.927201	0.979269
Bacteria.Firmicutes.Clostridia.Clostridiales.Peptococcaceae.Peptococcus.6f05bbb7b495e6ffda5b2dacaf47c75c	0	0.000403551	0.0410199	-0.270044	0.927201	0.979269
Bacteria.Firmicutes.Clostridia.Clostridiales.Clostridiaceae.Clostridium.bf724e4d31a620d070cf4d7dde605181	0.000858369	0.000857253	0.186974	0.249728	0.928421	0.979269
Bacteria.Firmicutes.Clostridia.Clostridiales.Ruminococcaceae.Sporobacter.28df51e7e3d4f482d8436935cbc31103	0	0.000218436	0.0249655	-0.132646	0.964203	0.979269
Bacteria.Firmicutes.Clostridia.Clostridiales.Ruminococcaceae.Oscillospira.9afec21f94117501214e65e1c9f2ca4a	0	0.00131062	0.149793	-0.878134	0.766287	0.979269
Bacteria.Firmicutes.Clostridia.Clostridiales.Lachnospiraceae.Roseburia.1c7f6704d2656cd97c59fe332c421d36	0	0.000769437	0.111262	-0.407442	0.890356	0.979269
Bacteria.Firmicutes.Clostridia.Clostridiales.Lachnospiraceae.Clostridium.67e33b4b60dc47cf7a80808177df7600	0.00063839	0.00163878	0.250737	-0.655298	0.7487	0.979269
Bacteria.Firmicutes.Clostridia.Clostridiales.Lachnospiraceae.Butyrivibrio.911675f4d32e3554da9c75204456b761	0.00107296	0.000771196	0.237751	0.436547	0.87163	0.979269
Bacteria.Firmicutes.Clostridia.Clostridiales.Lachnospiraceae.Lachnoanaerobaculum.f82a811080bf1cf89d30059e359dc5a4	0	0.000821033	0.122845	-0.554461	0.851182	0.979269
Bacteria.Firmicutes.Clostridia.Clostridiales.Lachnospiraceae.Moryella.14f71f6da9d62c42d0ca64f72e14117c	0	0.000168862	0.0146158	-0.132646	0.964203	0.979269
Bacteria.Firmicutes.Clostridia.Clostridiales.Lachnospiraceae.Hespellia.5830b9e0ec7b2fc87b4b20c93272c44e	0	0.000460087	0.0619744	-0.270044	0.927201	0.979269
Bacteria.Firmicutes.Clostridia.Clostridiales.Lachnospiraceae.Ruminococcus.ca3443e661e5449316a88cdc505f6506	0	0.00175515	0.190348	-1.17383	0.675031	0.979269
Bacteria.Tenericutes.Mollicutes.Mycoplasmatales.Mycoplasmataceae.Ureaplasma.392d582808b9f2a7f10a8cb6caa81a99	0	0.00019279	0.0429878	-0.132646	0.964203	0.979269
Bacteria.Firmicutes.Clostridia.Clostridiales.Ruminococcaceae.Clostridium.349bab8da37ab503ccfc4de9df2f71ae	0	0.000717505	0.0563693	-0.52162	0.859906	0.979269
Bacteria.Firmicutes.Clostridia.Clostridiales.Ruminococcaceae.Gemmiger.5a6289b8068d8b7722dafb10cc3d0b76	0	0.000213538	0.0192242	-0.132646	0.964203	0.979269
Bacteria.Firmicutes.Clostridia.Clostridiales.Veillonellaceae.Selenomonas.8296bb5a87fed6f75327fb4a31fd3ac9	0.000613497	0.000618464	0.18812	0.248613	0.921228	0.979269
Bacteria.Firmicutes.Erysipelotrichi.Erysipelotrichales.Erysipelotrichaceae.Sharpea.b1ebdc7dc82cf510768b062efab89fc9	0	0.000690131	0.0929616	-0.407442	0.890356	0.979269
Bacteria.Firmicutes.Erysipelotrichi.Erysipelotrichales.Erysipelotrichaceae.Catenibacterium.9b119c3c0fa910deca32fd7571866de7	0	0.00239084	0.352224	-1.73864	0.510434	0.979269
Bacteria.Firmicutes.Erysipelotrichi.Erysipelotrichales.Erysipelotrichaceae.Bulleidia.130fbd0b83784b157b5456c4a5e7b31c	0	0.00144335	0.155066	-0.877941	0.75868	0.979269
Bacteria.Firmicutes.Erysipelotrichi.Erysipelotrichales.Erysipelotrichaceae.[Eubacterium].c54bf70908b1db0f88baa5d62cbedb52	0	0.000852555	0.0989817	-0.554461	0.851182	0.979269
Bacteria.Actinobacteria.Coriobacteriia.Coriobacteriales.Coriobacteriaceae.Atopobium.bba6da0e81f92e0b2af4e957cd69f42e	0	0.00438808	0.402527	-2.12363	0.287103	0.979269
Bacteria.Actinobacteria.Coriobacteriia.Coriobacteriales.Coriobacteriaceae.Collinsella.24a243c38014e2daa1fadd8c23ec578f	0	0.000218436	0.0249655	-0.132646	0.964203	0.979269
Bacteria.Actinobacteria.Actinobacteria.Actinomycetales.Propionibacteriaceae.Propionibacterium.355c3240c6a55a96ef70dd3701c96392	0	0.000558604	0.0415818	-0.270044	0.927201	0.979269
Bacteria.Actinobacteria.Actinobacteria.Actinomycetales.Nocardioidaceae.Nocardioides.5e237fdf24ec5a39da3a96f651960bdd	0.000501672	0.00234502	0.238888	-0.733742	0.74597	0.979269
Bacteria.Actinobacteria.Actinobacteria.Actinomycetales.Pseudonocardiaceae.Actinomycetospora.f90f7eae39f7677d971b3e3bf07cd93c	0.000140449	0.00132213	0.226057	-0.681358	0.801581	0.979269
Bacteria.Actinobacteria.Actinobacteria.Actinomycetales.Intrasporangiaceae.Ornithinimicrobium.4887b9e61e0f12a4dfa84562a0286562	0	0.000690131	0.0447152	-0.270044	0.927201	0.979269
Bacteria.Actinobacteria.Actinobacteria.Actinomycetales.Intrasporangiaceae.Arsenicicoccus.d08816da2208006272450d0deb990bb6	0	0.000873744	0.0998619	-0.554461	0.851182	0.979269
Bacteria.Actinobacteria.Actinobacteria.Actinomycetales.Micrococcaceae.Rothia.a38d5871c6a2558a5483e235b81ccea7	0	0.00127054	0.261366	-1.0455	0.695881	0.979269
Bacteria.Actinobacteria.Actinobacteria.Actinomycetales.Micrococcaceae.Micrococcus.909f690848d650ee5d9418b2fdd3d7a7	0	0.000633666	0.04966	-0.270044	0.927201	0.979269
Bacteria.Actinobacteria.Actinobacteria.Actinomycetales.Micrococcaceae.Arthrobacter.6b780e361cfc5f06def718518324bdcb	0.00119403	0.00297046	0.322931	-0.727686	0.769146	0.979269
Bacteria.Actinobacteria.Actinobacteria.Actinomycetales.Microbacteriaceae.Leifsonia.009c0490f447bd0906ccd1112dfc0e41	0.00041841	0	0.0445764	0.319378	0.913933	0.979269
Bacteria.Actinobacteria.Actinobacteria.Actinomycetales.Actinomycetaceae.Varibaculum.d1aadcd662c4544681299bc9f7691005	0	0.000646412	0.0675798	-0.407442	0.890356	0.979269
Bacteria.Actinobacteria.Actinobacteria.Bifidobacteriales.Bifidobacteriaceae.Bifidobacterium.bb45fa7900274653add1649b7efa45fa	0	0.000594027	0.0877732	-0.407442	0.890356	0.979269
Bacteria.Actinobacteria.Actinobacteria.Actinomycetales.Brevibacteriaceae.Brevibacterium.fde5540f3a06738d19a24a009ffbe803	0	0.00324191	0.249151	-1.49874	0.582923	0.979269
Bacteria.Actinobacteria.Actinobacteria.Actinomycetales.Geodermatophilaceae.Blastococcus.662b29eb9082207780e8449c2d3e2f66	0.000643777	0	0.0699512	0.48687	0.869112	0.979269
Bacteria.Actinobacteria.Actinobacteria.Actinomycetales.Dietziaceae.Dietzia.611f22c4148835b3347e113a625e4b3f	0.00150688	0.00859057	0.805263	-1.63867	0.28985	0.979269
Bacteria.Actinobacteria.Actinobacteria.Actinomycetales.Gordoniaceae.Millisia.c5d7d9d0e2804a8dcae9332f0ff626aa	0	0.000345066	0.0223576	-0.132646	0.964203	0.979269
Bacteria.Actinobacteria.Thermoleophilia.Solirubrobacterales.Solirubrobacteraceae.Solirubrobacter.9bbfa59334bffb8eeb01a78e49505dc0	0.00134328	0	0.0735776	0.809022	0.784131	0.979269
Bacteria.Actinobacteria.Thermoleophilia.Gaiellales.Gaiellaceae.Gaiella.605690a8bfc31341b7529447072b94f4	0	0.000276855	0.0126456	-0.132646	0.964203	0.979269
Bacteria.Firmicutes.Bacilli.Bacillales.Planococcaceae.Bacillus.6d350e1fecb972294579217f2a162e80	0.000180505	0	0.0297451	0.15978	0.956884	0.979269
Bacteria.Firmicutes.Bacilli.Bacillales.Listeriaceae.Brochothrix.ecfe86307ef82349547adb9ca8c879df	0	0.000865801	0.0819073	-0.407442	0.890356	0.979269
Bacteria.Firmicutes.Bacilli.Bacillales.Bacillaceae.Bacillus.8adb5559e135233565acfea1287280bf	0.000811607	0.00164082	0.150257	-0.122322	0.95925	0.979269
Bacteria.Firmicutes.Bacilli.Bacillales.Planococcaceae.Kurthia.c740f718c86d6e26b1435cabd580ffd7	0.00100334	0	0.114691	1.05246	0.721454	0.979269
Bacteria.Firmicutes.Bacilli.Lactobacillales.Aerococcaceae.Alloiococcus.fdb77967f908752412f454de1ff74bbf	0	0.011772	0.592957	-2.64789	0.218707	0.979269
Bacteria.Firmicutes.Bacilli.Lactobacillales.Aerococcaceae.Abiotrophia.4bf54a44bb85f2739e3520ace97b4eae	0	0.000854153	0.0768968	-0.554461	0.851182	0.979269
Bacteria.Firmicutes.Bacilli.Lactobacillales.Carnobacteriaceae.Isobaculum.13e52764e1c08c4fd9902769bf9e022e	0	0.00075208	0.0894207	-0.530854	0.857451	0.979269
Bacteria.Firmicutes.Bacilli.Lactobacillales.Leuconostocaceae.Weissella.98cbd757ca4e20143622547345fcb59d	0.000361011	0.00217825	0.156744	-0.479585	0.86749	0.979269
Bacteria.Firmicutes.Bacilli.Lactobacillales.Lactobacillaceae.Pediococcus.21c47ce7835c803aede78d5bf66c8791	0	0.00104694	0.119885	-0.709997	0.81012	0.979269
Bacteria.Firmicutes.Bacilli.Lactobacillales.Lactobacillaceae.Lactobacillus.14e17db5e320a328caf7b1a40f524e4e	0.000575603	0.000577201	0.137412	0.211982	0.941844	0.979269
Bacteria.Firmicutes.Bacilli.Bacillales.Planococcaceae.Staphylococcus.ed731f07a20332ea13fc88a1752b45ed	0	0.0123306	0.198003	-1.18844	0.687359	0.979269
Bacteria.Firmicutes.Bacilli.Bacillales.Staphylococcaceae.Macrococcus.23170b75adb12d09ce332a4b82fb06e7	0.000214592	0.00101821	0.221966	-0.722698	0.790472	0.979269
Bacteria.Firmicutes.Bacilli.Bacillales.Staphylococcaceae.Staphylococcus.33dc90ca789a50f6834d41f949935bee	0	0.000215471	0.0225266	-0.132646	0.964203	0.979269
Bacteria.Bacteroidetes.Bacteroidia.Bacteroidales.Rikenellaceae.Alistipes.128d098a0f85253d7c68558aa2e2edaa	0.000643777	0.00762395	0.144848	0.0746774	0.979835	0.979835
Bacteria.Firmicutes.Clostridia.Clostridiales.Lachnospiraceae.Dorea.e6e736770ba0182e08607e5032536759	0.000429185	0.000655308	0.121531	-0.0928154	0.974943	0.979835

## Sheet: 8_KEGG_pathways_all_patients_dT
Pathway	Abundance in dTBLs	Abundance in nTBLs	baseMean	Log fold-change	p-value	Adj. p-val
Cytochrome P450	87.191	1.21311	33.9259	5.45838	1.39e-22	3.62e-20
Steroid hormone biosynthesis	747.494	67.2295	326.047	2.86217	1.48e-19	1.92e-17
Biosynthesis of siderophore group nonribosomal peptides	1221.89	211.18	608.469	1.86335	3.19e-17	2.77e-15
Primary bile acid biosynthesis	395.921	58.9344	187.98	2.06855	3.71e-14	2.41e-12
Caffeine metabolism	92.9775	8.4918	39.9576	2.89661	4.78e-13	2.49e-11
Betalain biosynthesis	96.3146	9.60656	41.7508	2.8933	6.41e-13	2.78e-11
Fatty acid metabolism	7295.09	3003.03	4453.97	0.871251	1.38e-11	5.11e-10
Lipid biosynthesis proteins	8539.12	4523.18	5911.87	0.489872	7.44e-11	2.42e-09
beta-Alanine metabolism	4089.76	1620.34	2475.92	0.908787	2.35e-10	6.06e-09
Biosynthesis and biodegradation of secondary metabolites	1093.27	469.738	695.378	0.833401	2.56e-10	6.06e-09
Chloroalkane and chloroalkene degradation	2786.75	1152.28	1719.89	0.863915	2.22e-10	6.06e-09
Lysine degradation	4000.75	1738.34	2506.7	0.792034	3.3e-10	7.14e-09
Prion diseases	309.798	76.7213	160.038	1.50382	5.99e-10	1.17e-08
Tryptophan metabolism	5295.01	2363.59	3356.52	0.774718	6.28e-10	1.17e-08
Valine, leucine and isoleucine degradation	7741.43	3554.1	4926.21	0.754659	1.11e-09	1.92e-08
Propanoate metabolism	8067.84	4204.84	5536.56	0.514259	2.52e-09	4.1e-08
Replication, recombination and repair proteins	5046.29	5107.23	5042.08	-0.314064	3.44e-09	5.26e-08
Limonene and pinene degradation	2771.22	930.574	1555.67	1.06897	8.26e-09	1.19e-07
Biosynthesis of unsaturated fatty acids	2262.81	1168.74	1506.79	0.597663	9.9e-09	1.35e-07
Retinol metabolism	1013.76	369.098	596.627	1.03571	3.03e-08	3.94e-07
Glycerophospholipid metabolism	3553.26	3386.28	3414.11	-0.214451	4.24e-08	4.86e-07
Peroxisome	2954.11	1661.52	2091.48	0.44903	4.13e-08	4.86e-07
Steroid biosynthesis	215.798	51.623	112.026	1.6502	4.3e-08	4.86e-07
D-Glutamine and D-glutamate metabolism	934.764	951.656	940.164	-0.291689	5.22e-08	5.66e-07
Peptidases	11089.2	10622	10775.1	-0.218263	6.74e-08	7e-07
Sulfur metabolism	2995.27	1910.72	2280.85	0.328777	7.17e-08	7.17e-07
D-Alanine metabolism	699.348	732.295	730.556	-0.34811	8.36e-08	8.05e-07
Peptidoglycan biosynthesis	4554.66	4533.74	4590.74	-0.293658	1.01e-07	9.39e-07
Cell cycle - Caulobacter	3241.83	3240.62	3219.99	-0.278681	1.8e-07	1.55e-06
Proteasome	718.416	278.557	437.757	0.878972	1.85e-07	1.55e-06
Ribosome Biogenesis	8603.16	8766.69	8731.28	-0.301997	1.82e-07	1.55e-06
PPAR signaling pathway	2166.79	1196.1	1496.59	0.490422	3.19e-07	2.6e-06
Aminoacyl-tRNA biosynthesis	6834.01	6603.13	6724.65	-0.264417	4.18e-07	3.29e-06
Translation proteins	5058.93	5218.51	5151.85	-0.293199	4.34e-07	3.32e-06
Caprolactam degradation	1384.78	417.443	743.662	1.40654	5.78e-07	4.18e-06
RNA degradation	3129.87	2951.79	3023.99	-0.207079	5.74e-07	4.18e-06
Amino acid related enzymes	9065.52	8310.34	8576.84	-0.1728	7.3e-07	5.13e-06
Butanoate metabolism	7943.72	4833.49	5790.65	0.356208	8.5e-07	5.81e-06
Geraniol degradation	2184.67	842.607	1256.31	1.05619	9.01e-07	6.01e-06
Chromosome	9060	8836.08	8884.04	-0.21774	9.78e-07	6.36e-06
RNA polymerase	1079.83	1035.13	1065.01	-0.265624	1.48e-06	9.37e-06
Basal transcription factors	114.663	32.3934	65.4553	1.22833	2e-06	1.24e-05
DNA replication proteins	6540.25	6566.38	6653.66	-0.293761	2.09e-06	1.26e-05
One carbon pool by folate	3224.92	3058.1	3118.31	-0.223591	2.31e-06	1.37e-05
Bisphenol degradation	780.034	339.803	476.287	0.804599	2.74e-06	1.59e-05
Mismatch repair	4879.29	4651.72	4768.44	-0.244037	2.81e-06	1.59e-05
Chaperones and folding catalysts	6492.56	6590.08	6483.29	-0.255492	3.03e-06	1.68e-05
Stilbenoid, diarylheptanoid and gingerol biosynthesis	318.562	86.1639	165.709	1.31861	3.25e-06	1.73e-05
Translation factors	3148.36	3071.38	3127.75	-0.264422	3.22e-06	1.73e-05
Cell motility and secretion	1157.46	1402.43	1261.62	-0.439271	6.06e-06	3.15e-05
Benzoate degradation	4957.16	2507.36	3245.42	0.622757	6.52e-06	3.32e-05
DNA replication	4129.53	3888.93	4029.22	-0.230242	7.43e-06	3.71e-05
Protein export	4106.34	3768.62	3900.89	-0.189209	1e-05	4.91e-05
Phenylalanine metabolism	3012.16	1793.18	2147.72	0.492717	1.11e-05	5.33e-05
African trypanosomiasis	246.719	86.6557	144.983	1.02461	1.21e-05	5.71e-05
Ribosome	14661.2	13698.8	14221.6	-0.233654	1.55e-05	7.19e-05
Meiosis - yeast	502.326	178.525	287.197	1.08061	1.62e-05	7.39e-05
Glyoxylate and dicarboxylate metabolism	5419.01	3728.23	4190.26	0.27116	1.68e-05	7.51e-05
Carbon fixation in photosynthetic organisms	3567.31	3325.33	3409.02	-0.198189	1.76e-05	7.74e-05
Citrate cycle (TCA cycle)	6553.48	4307.66	5107.87	0.229668	1.85e-05	8.01e-05
Nitrogen metabolism	6057.12	4396.13	4964.34	0.136008	1.93e-05	8.24e-05
Type I diabetes mellitus	510.045	327.344	396.751	0.231662	2.11e-05	8.86e-05
Polycyclic aromatic hydrocarbon degradation	603.404	201.148	331.608	1.21091	2.52e-05	0.000100734
Protein folding and associated processing	5087.51	4624.57	4721.39	-0.130896	2.49e-05	0.000100734
Synthesis and degradation of ketone bodies	1799.31	904.016	1186.38	0.635093	2.45e-05	0.000100734
Bladder cancer	127.382	49.7541	76.1208	1.00474	2.65e-05	0.000104221
Tuberculosis	1609.67	1016.34	1226.34	0.248676	3.9e-05	0.000151348
Chlorocyclohexane and chlorobenzene degradation	892.281	366.23	547.602	1.02344	4.04e-05	0.000154465
Lipopolysaccharide biosynthesis proteins	2420.08	3009.02	2699.59	-0.448659	4.11e-05	0.000155057
Purine metabolism	15437.5	13623.9	14385.6	-0.142662	4.4e-05	0.000163429
Homologous recombination	5831.96	5475.36	5663.53	-0.224801	4.52e-05	0.000165589
Zeatin biosynthesis	292.528	291.705	298.028	-0.321032	4.74e-05	0.00017113
Non-homologous end-joining	424.64	151.902	244.418	1.21102	6.29e-05	0.000224048
Plant-pathogen interaction	895.685	857.311	858.878	-0.200841	7.33e-05	0.000257584
Glutamatergic synapse	768.989	507.459	600.859	0.279435	8.16e-05	0.000282972
Pyrimidine metabolism	11449.9	10348	10915.2	-0.188425	0.000112438	0.000384655
Amyotrophic lateral sclerosis (ALS)	732.135	386.377	492.243	0.625378	0.000118161	0.000398984
Xylene degradation	386.022	168.148	242.873	0.739821	0.000143775	0.000479251
Glycosyltransferases	3271.03	2237.33	2641.87	0.167299	0.000206892	0.000680911
Tetracycline biosynthesis	565.337	668.393	627.418	-0.478542	0.000221573	0.000720114
Bacterial toxins	835.73	908.967	964	-0.525928	0.000291676	0.000913684
RNA transport	317.36	328.115	324.521	-0.335311	0.000284749	0.000913684
Transporters	35951.3	34921.1	34984.9	-0.207804	0.000288751	0.000913684
DNA repair and recombination proteins	19396.8	17094.9	18046.4	-0.136854	0.000296361	0.000917308
Epithelial cell signaling in Helicobacter pylori infection	266.146	392.066	350.337	-0.711478	0.000374254	0.00113198
Signal transduction mechanisms	2326.76	2287	2290.2	-0.200967	0.000374423	0.00113198
ABC transporters	19224.4	20312.6	19341.7	-0.269343	0.000450578	0.00134655
Toluene degradation	1559.91	986.262	1175.34	0.333997	0.000688054	0.00203289
Protein kinases	3283.43	2155.39	2515.37	0.267972	0.000817323	0.00238768
Tyrosine metabolism	3453.99	2228.08	2547.35	0.320443	0.000866839	0.0025042
Alzheimer's disease	544.584	623.18	561.734	-0.303977	0.000940448	0.00262921
Restriction enzyme	678.888	1017	892.369	-0.700034	0.000938922	0.00262921
Ubiquitin system	300.461	156.525	209.356	0.556538	0.00092187	0.00262921
Thiamine metabolism	2184.62	2009.51	2095.91	-0.175508	0.000964838	0.0026687
Type II diabetes mellitus	283.921	271.213	282.52	-0.278299	0.00113082	0.00306264
Valine, leucine and isoleucine biosynthesis	5075.63	3716.21	4172.32	0.139141	0.00112467	0.00306264
Other ion-coupled transporters	8563.75	8246.67	8433.44	-0.194387	0.00114598	0.0030717
Pyruvate metabolism	9261.92	6433.13	7456.34	0.144967	0.00133477	0.00354123
Naphthalene degradation	1938.22	1058.46	1310.48	0.459686	0.0015965	0.00419282
Aminobenzoate degradation	2976.58	1717.08	2065.72	0.4098	0.00168371	0.00437765
Drug metabolism - cytochrome P450	1565.83	868.787	1057.14	0.591266	0.00187613	0.00482964
Pores ion channels	2609.19	2900.61	2697.39	-0.27615	0.00195522	0.00498389
Carbon fixation pathways in prokaryotes	8103.56	5846.51	6612.57	0.111232	0.00223197	0.0056341
Protein processing in endoplasmic reticulum	540.202	287.951	373.778	0.450021	0.00229554	0.00573885
Bacterial secretion system	5096.02	4948.98	4962.81	-0.189491	0.00322795	0.00799302
Photosynthesis proteins	2370.39	2423.41	2341.95	-0.264099	0.00397236	0.00974352
Secretion system	9814.35	10110.8	9765.43	-0.214432	0.00404235	0.00982252
Styrene degradation	859.404	532.59	611.836	0.460674	0.00426965	0.0102788
Biosynthesis of ansamycins	410.101	408.541	403.601	-0.218855	0.00451082	0.0107598
Function unknown	10928.6	10077.1	10260	-0.117957	0.00461741	0.0109139
Amino acid metabolism	682.798	671.41	635.984	-0.237982	0.00478644	0.0112115
D-Arginine and D-ornithine metabolism	131.36	63.5082	88.2014	0.580829	0.00485894	0.0112797
Taurine and hypotaurine metabolism	1265.2	882.131	1014.9	0.165498	0.0049092	0.0112955
Cell division	448.517	492.754	464.89	-0.309525	0.00517505	0.0118027
Chagas disease (American trypanosomiasis)	152.955	75.2787	103.954	0.618562	0.0052875	0.0119544
Cytoskeleton proteins	1565.67	1473.3	1493.17	-0.159241	0.00611505	0.0137061
Dioxin degradation	428.326	215.836	297.643	0.467573	0.00624036	0.0138675
Phosphotransferase system (PTS)	1453.98	1943.28	1906.65	-0.658264	0.0064423	0.0141949
Galactose metabolism	2795.57	2559.85	2760.54	-0.228493	0.00741389	0.0161984
Photosynthesis	2226.4	2199.97	2164.97	-0.232213	0.00760243	0.0164719
C5-Branched dibasic acid metabolism	2013.39	1328	1559.07	0.289578	0.00847245	0.0182053
Ion channels	139	186.295	169.431	-0.551607	0.00864474	0.0184232
Arginine and proline metabolism	7716.69	5874.84	6477.83	0.0929104	0.00884431	0.0186953
Metabolism of xenobiotics by cytochrome P450	1361.96	828.148	958.039	0.480825	0.00965739	0.0202494
alpha-Linolenic acid metabolism	297.213	172.77	206.996	0.47888	0.00987481	0.0205396
Ascorbate and aldarate metabolism	1592.16	997.164	1219.39	0.296165	0.0106538	0.0219841
Lipopolysaccharide biosynthesis	1795.63	2298.28	2007.75	-0.44405	0.0107458	0.0219992
Flavonoid biosynthesis	118.64	54.8852	74.8323	0.599709	0.0129235	0.0262509
Penicillin and cephalosporin biosynthesis	166.607	87.4754	116.438	0.565756	0.0143143	0.0288505
Tropane, piperidine and pyridine alkaloid biosynthesis	989.494	705.59	794.058	0.206615	0.0146033	0.0292065
Cellular antigens	435.326	464.41	437.282	-0.235238	0.0167543	0.0332528
Electron transfer carriers	238.685	264.951	240.024	-0.441647	0.0173625	0.0341988
Riboflavin metabolism	1468.37	1281.79	1338.8	-0.0890445	0.019234	0.0376003
Streptomycin biosynthesis	2325.74	1590.18	1861.94	0.149273	0.0201109	0.0390212
Ether lipid metabolism	172.944	87.2787	125.663	0.585368	0.0211413	0.0407166
Bacterial invasion of epithelial cells	28.4382	42.0328	41.1543	-0.887159	0.0219605	0.0419833
Staphylococcus aureus infection	447.191	586.393	667.078	-0.84675	0.0221781	0.0420898
Glycolysis / Gluconeogenesis	8316.54	5993.23	6916.29	0.0846109	0.0238586	0.044951
Folate biosynthesis	3137.1	2733.34	2851.53	-0.080778	0.0262155	0.0490362
Other transporters	1497.53	1520.44	1484.3	-0.218927	0.02798	0.0519629
Huntington's disease	895.393	634.525	693.493	0.227015	0.0292628	0.0539598
Apoptosis	173.472	250.803	198.259	-0.512415	0.0318522	0.0583209
Glycine, serine and threonine metabolism	6581.92	5107.79	5612.79	0.079745	0.0325349	0.0591544
Fluorobenzoate degradation	442.404	261.016	317.785	0.601239	0.0331462	0.0598473
Phenylalanine, tyrosine and tryptophan biosynthesis	5170.01	4453.7	4678.33	-0.0618141	0.0334465	0.0599731
Arachidonic acid metabolism	509.933	475.672	469.624	-0.152211	0.0338054	0.0602013
Base excision repair	3585.37	2663.87	3017.02	0.0724301	0.0348671	0.0616696
Prenyltransferases	1785.18	1511.97	1612.95	-0.086974	0.0352918	0.0619991
Membrane and intracellular structural molecules	4256.39	4108.87	4066.55	-0.150554	0.0355911	0.0621052
Transcription related proteins	35.9438	40.8689	44.9265	-0.699371	0.0404524	0.0701174
Methane metabolism	6639.8	5583.1	5932.19	-0.0730967	0.0409073	0.0704364
Novobiocin biosynthesis	1013.24	734.459	831.982	0.168003	0.0418686	0.0716174
Amoebiasis	49.7865	66.4754	58.4636	-0.527513	0.0460037	0.0779665
beta-Lactam resistance	95.5393	111.295	124.542	-0.619487	0.0461801	0.0779665
Pantothenate and CoA biosynthesis	4371.49	3308.25	3694.49	0.0696846	0.0499241	0.0837436
Inositol phosphate metabolism	1358.82	984.852	1130.5	0.148394	0.0526763	0.0877939
Vitamin B6 metabolism	1304.57	1136.52	1194.2	-0.0968826	0.0551722	0.0913679
Lysine biosynthesis	4414.73	3311.46	3721.48	0.100744	0.0568732	0.0935887
Carotenoid biosynthesis	439.382	223.77	312.869	0.446672	0.0579707	0.0947948
Mineral absorption	94.2921	125.082	112.335	-0.451034	0.060892	0.0989495
Endocytosis	5.39326	4.11475	1.6254	1.92037	0.0619975	0.0995022
Fc gamma R-mediated phagocytosis	5.39326	4.11475	1.6254	1.92037	0.0619975	0.0995022
Transcription factors	8664.36	7898.23	8199.97	-0.103095	0.0628816	0.100302
Amino sugar and nucleotide sugar metabolism	7271.57	6165.95	6699.97	-0.0889395	0.0653802	0.103023
GnRH signaling pathway	5.39326	4.14754	1.63988	1.85147	0.0653231	0.103023
N-Glycan biosynthesis	112.303	145.082	129.12	-0.423119	0.0796934	0.124821
Energy metabolism	6099.97	4709.59	5127.37	0.093037	0.0860562	0.13398
Glycan biosynthesis and metabolism	287.18	363.541	323.264	-0.379508	0.0897059	0.138192
Selenocompound metabolism	2821.2	2138.64	2382.71	0.0617913	0.089825	0.138192
Pentose and glucuronate interconversions	2713.42	1938.84	2241.2	0.121917	0.0907972	0.138866
Cardiac muscle contraction	111.663	165.557	125.088	-0.439024	0.106788	0.162367
Bacterial motility proteins	4952.94	5787.13	5050.01	-0.270985	0.109294	0.165212
Polyketide sugar unit biosynthesis	1169.84	785.82	915.811	0.188356	0.115865	0.174132
Phosphonate and phosphinate metabolism	363.831	355.721	354.426	-0.156751	0.117528	0.175617
Histidine metabolism	3882.81	2908.74	3174.09	0.0906786	0.123861	0.184022
Fructose and mannose metabolism	3977.25	3282.95	3619.63	-0.0873839	0.143228	0.211587
Adipocytokine signaling pathway	716.584	654.902	651.625	-0.123287	0.14487	0.211608
Secondary bile acid biosynthesis	31.7978	36.1311	37.1432	-0.472004	0.144364	0.211608
Flavone and flavonol biosynthesis	11.6854	7.04918	10.3508	0.621813	0.152481	0.22148
Drug metabolism - other enzymes	1888.18	1555.97	1728.33	-0.0840496	0.168875	0.243931
Parkinson's disease	215.865	301.246	232.432	-0.381118	0.17001	0.244214
Atrazine degradation	225.348	279.328	244.631	-0.385363	0.171412	0.244875
Pentose phosphate pathway	5130.38	4164.8	4570	-0.0423087	0.189374	0.269056
MAPK signaling pathway - yeast	232.371	219.541	211.57	-0.143902	0.192591	0.272139
Metabolism of cofactors and vitamins	1264.75	1003.1	1066.03	0.0618529	0.20422	0.287012
Vibrio cholerae infection	20.618	14.3607	18.6884	0.582917	0.206165	0.288187
Cysteine and methionine metabolism	5786.02	4851.7	5199.41	-0.0390342	0.217952	0.303034
Glycosaminoglycan degradation	173.416	190.934	202.183	-0.389386	0.23156	0.320243
Sporulation	525.921	527.279	545.37	-0.237277	0.240499	0.330845
Photosynthesis - antenna proteins	45.4382	88.2787	62.358	-0.929065	0.263545	0.360599
Protein digestion and absorption	68.1798	80.7869	81.4856	-0.397425	0.264902	0.360599
RIG-I-like receptor signaling pathway	33.7191	27.1803	31.4267	0.331529	0.269014	0.36429
Flagellar assembly	1794.43	2138.43	1870.06	-0.305567	0.272817	0.367526
Ribosome biogenesis in eukaryotes	440.011	370.852	391.497	-0.0515329	0.281631	0.377444
Lipoic acid metabolism	513.371	446.361	475.933	-0.110408	0.287203	0.382937
Colorectal cancer	103.539	135.066	106.769	-0.317679	0.298211	0.384386
Influenza A	103.652	135.344	106.948	-0.319302	0.29579	0.384386
NOD-like receptor signaling pathway	194.416	165.098	174.149	-0.134713	0.294628	0.384386
p53 signaling pathway	103.539	135.066	106.769	-0.317679	0.298211	0.384386
Renal cell carcinoma	216.202	162.426	182.591	0.120773	0.292917	0.384386
Small cell lung cancer	104	135.475	107.134	-0.315696	0.300117	0.384386
Toxoplasmosis	103.607	135.066	106.808	-0.316688	0.29974	0.384386
Viral myocarditis	103.539	135.066	106.769	-0.317679	0.298211	0.384386
Isoflavonoid biosynthesis	2.19101	1.22951	1.67204	0.685843	0.305752	0.389684
Linoleic acid metabolism	331.742	233.311	248.082	0.174743	0.309251	0.392221
Carbohydrate digestion and absorption	66.7865	72.1475	78.1116	-0.307242	0.312521	0.393868
Other glycan degradation	481.674	508.213	542.665	-0.285574	0.31358	0.393868
Two-component system	12616.2	9890.26	10596.6	0.0617497	0.326858	0.408573
Renin-angiotensin system	12.4607	15.7541	12.8888	-0.37702	0.332376	0.413482
Biosynthesis of vancomycin group antibiotics	332.91	237.869	264.32	0.121871	0.344852	0.42696
Oxidative phosphorylation	9309.18	7256.75	7865.55	0.0334547	0.350955	0.428396
Transcription machinery	5418.98	4441.61	4811.07	-0.0350463	0.348271	0.428396
Vibrio cholerae pathogenic cycle	448.91	422.443	436.618	-0.0987523	0.349466	0.428396
Bacterial chemotaxis	1854.13	2000.31	1817.74	-0.172602	0.37764	0.458815
Nicotinate and nicotinamide metabolism	3282.42	2693.74	2877.53	-0.0227168	0.3847	0.465219
Butirosin and neomycin biosynthesis	280.64	241.967	261.447	-0.0874766	0.388718	0.467901
Nucleotide metabolism	496.348	410.066	463.56	-0.0866335	0.394373	0.47252
Inorganic ion transport and metabolism	1864.89	1543.95	1611.39	0.0471535	0.418774	0.499455
Alanine, aspartate and glutamate metabolism	6127.71	5081.79	5425.29	-0.0195257	0.43497	0.514055
Sphingolipid metabolism	487.854	355.246	420.7	0.119878	0.433316	0.514055
Pathways in cancer	504.011	450.836	448.9	-0.0579398	0.461787	0.543279
Ethylbenzene degradation	621.011	518.754	509.537	-0.123652	0.481331	0.563721
Pertussis	290.112	317.311	302.727	-0.18027	0.496583	0.578976
Shigellosis	5.51685	11.3115	6.86594	-0.686508	0.504605	0.585703
Isoquinoline alkaloid biosynthesis	433.753	343.377	366.815	0.0726914	0.518461	0.59911
Glycosphingolipid biosynthesis - globo series	182.461	186.508	197.468	-0.191948	0.525265	0.604287
Melanogenesis	6.76404	4.91803	5.36336	0.488103	0.549518	0.629404
Nucleotide excision repair	2920.18	2319.3	2558.6	-0.0269331	0.556241	0.63431
Antigen processing and presentation	183.775	152.967	159.164	-0.0816066	0.569414	0.640899
Progesterone-mediated oocyte maturation	183.775	152.967	159.164	-0.0816066	0.569414	0.640899
Prostate cancer	183.775	152.967	159.164	-0.0816066	0.569414	0.640899
Biosynthesis of type II polyketide products	1.46067	1	1.25289	0.473619	0.578808	0.648664
Glycosphingolipid biosynthesis - ganglio series	112.135	113.279	122.767	-0.183902	0.585115	0.652918
Biotin metabolism	1088.9	908.951	964.979	-0.0355989	0.591293	0.656992
Sulfur relay system	2260.22	1896.89	1994.35	-0.027471	0.59431	0.657534
Fatty acid biosynthesis	3849.49	2969.49	3260.23	0.025088	0.599225	0.660163
General function prediction only	26704.4	21002.8	22932.5	0.00995267	0.6439	0.706389
Glycerolipid metabolism	2592.37	1963.38	2210.19	0.0225353	0.662751	0.724014
Terpenoid backbone biosynthesis	4306.21	3262.56	3646.7	0.0175243	0.673548	0.73273
Lysosome	238.584	234.049	254.445	-0.126703	0.677448	0.733902
Lipid metabolism	977.775	804.885	870.568	-0.0218018	0.692183	0.743722
Systemic lupus erythematosus	9.89888	8.08197	8.26511	0.2187	0.692233	0.743722
Starch and sucrose metabolism	4415.35	3606.23	3963.92	-0.0204416	0.695178	0.743812
Proximal tubule bicarbonate reclamation	255.989	233.213	229.351	-0.056705	0.699633	0.745511
Porphyrin and chlorophyll metabolism	6054.2	4900.98	5147.44	0.0263987	0.70928	0.752706
Germination	36.7416	31.082	34.9818	0.20405	0.721004	0.762037
Phenylpropanoid biosynthesis	454.854	349.574	383.875	0.0476351	0.76302	0.803179
Bile secretion	2.53933	2.45902	2.60475	0.152544	0.785751	0.820463
Nitrotoluene degradation	366.494	319.344	315.522	0.0503856	0.785077	0.820463
Hypertrophic cardiomyopathy (HCM)	4.88764	5.22951	4.91009	-0.116906	0.819087	0.851851
Glutathione metabolism	2986.18	2514.66	2575.19	0.0100329	0.827217	0.856878
Phosphatidylinositol signaling system	859.551	683.377	745.306	-0.00932474	0.842246	0.868984
Indole alkaloid biosynthesis	3.61798	3.95082	3.31059	-0.106316	0.853687	0.877307
Spliceosome	3.44944	4	4.16873	-0.168927	0.869986	0.890537
Cyanoamino acid metabolism	1665.9	1354.82	1449.64	0.00708591	0.887417	0.904818
Insulin signaling pathway	456.36	371.016	398.385	0.00723097	0.93425	0.944774
Others	5203.16	4097.18	4507.09	-0.00270047	0.937507	0.944774
Primary immunodeficiency	416.685	333.689	360.854	0.00395611	0.935794	0.944774
Carbohydrate metabolism	809.944	657.049	722.011	-0.00463557	0.963103	0.963103
Ubiquinone and other terpenoid-quinone biosynthesis	1972.69	1662.9	1747.8	0.00536027	0.960087	0.963103

## Sheet: 9_KEGG_pathways_all_patients_HI
Pathway	Abundance in HIV positive	Abundance in HIV negative	baseMean	Log fold-change	p-value	Adj. p-val
Base excision repair	3256.92	2863.54	3038.19	0.108112	0.00090851	0.0194511
beta-Alanine metabolism	3223.67	2298.74	2518.14	0.505093	0.000939617	0.0194511
Biosynthesis and biodegradation of secondary metabolites	865.444	642.105	707.492	0.461616	0.000678619	0.0194511
Biosynthesis of siderophore group nonribosomal peptides	864.25	508.276	619.614	0.88353	0.000272104	0.0194511
Biosynthesis of unsaturated fatty acids	1868.07	1452.64	1531.14	0.352979	0.00118899	0.0194511
Butanoate metabolism	6879.38	5583.3	5872.92	0.24873	0.000805095	0.0194511
Cell motility and secretion	1227.96	1329.49	1251	-0.329644	0.000491371	0.0194511
Chloroalkane and chloroalkene degradation	2172.6	1581.64	1751.93	0.479605	0.000856812	0.0194511
Fatty acid metabolism	5785.85	4168.57	4538.06	0.476735	0.000511967	0.0194511
Lipid biosynthesis proteins	7154.32	5632.36	5971.86	0.275395	0.000684696	0.0194511
Lipopolysaccharide biosynthesis proteins	2631.4	2873.5	2704.69	-0.380188	0.000529185	0.0194511
Lysine degradation	3209.67	2342.83	2547.61	0.448744	0.000804886	0.0194511
Propanoate metabolism	6748.29	5244.89	5615.7	0.299953	0.00103535	0.0194511
Proteasome	569.292	396.961	446.235	0.553987	0.00124311	0.0194511
Tryptophan metabolism	4265.44	3148.74	3415.33	0.431865	0.00112579	0.0194511
Type I diabetes mellitus	441.639	370.158	400.327	0.208796	0.000124367	0.0194511
Valine, leucine and isoleucine degradation	6283	4674.54	5013.52	0.425864	0.00111488	0.0194511
Bisphenol degradation	637.694	442.171	485.809	0.542418	0.0016744	0.0208835
Chromosome	8972.72	8877.68	8923.99	-0.142189	0.00154503	0.0208835
Limonene and pinene degradation	2154.42	1421.59	1582.77	0.613535	0.00153883	0.0208835
Primary bile acid biosynthesis	279.597	157.882	191.684	0.923086	0.00172721	0.0208835
Tuberculosis	1389.71	1168.39	1236.17	0.19067	0.00167054	0.0208835
African trypanosomiasis	191.264	124.658	144.486	0.737969	0.00188339	0.0217818
Tetracycline biosynthesis	624.931	646.592	624.767	-0.396826	0.00200892	0.0222656
PPAR signaling pathway	1849.36	1452.47	1525	0.285771	0.00231264	0.0246065
Peroxisome	2508.04	2005.54	2120.5	0.257635	0.00274102	0.0270041
Steroid hormone biosynthesis	506.986	271.697	332.879	1.0604	0.0027231	0.0270041
Caffeine metabolism	63.3472	32	40.8938	1.26041	0.00318959	0.0303011
Photosynthesis proteins	2385.99	2467.74	2350.39	-0.261536	0.00375363	0.0318758
Pores ion channels	2699.11	2859.49	2721.47	-0.259347	0.00355301	0.0318758
Stilbenoid, diarylheptanoid and gingerol biosynthesis	241.167	146.75	169.622	0.814286	0.00370605	0.0318758
Sulfur metabolism	2635.64	2220.93	2317.95	0.16277	0.00383469	0.0318758
RNA transport	320.944	326.882	329.016	-0.247721	0.00486206	0.0391911
Benzoate degradation	4140.36	3104.2	3303.65	0.392348	0.00538214	0.0421073
Glutamatergic synapse	661.972	576.079	605.241	0.197805	0.00571546	0.0434375
Retinol metabolism	758.417	549.539	608.599	0.531178	0.00588196	0.0434611
Basal transcription factors	89.3472	54.0658	66.8895	0.716206	0.00652569	0.0461671
Geraniol degradation	1749.33	1192.54	1281.01	0.599154	0.00659531	0.0461671
Bacterial secretion system	5018.26	4987.96	4939.87	-0.158081	0.00709897	0.0484186
Lipopolysaccharide biosynthesis	1988.25	2213.83	2007.2	-0.455541	0.00824048	0.0547992
Citrate cycle (TCA cycle)	5753.42	4907.78	5137.32	0.141002	0.00943426	0.0581726
Phosphonate and phosphinate metabolism	365.236	366.434	357.608	-0.254427	0.00962253	0.0581726
Polycyclic aromatic hydrocarbon degradation	473.25	298.105	336.017	0.759852	0.00958055	0.0581726
Prion diseases	227.111	147.816	160.058	0.674197	0.0092158	0.0581726
Chaperones and folding catalysts	6496.32	6501.21	6499.66	-0.142542	0.0100851	0.0596141
Photosynthesis	2215.54	2249.39	2172.97	-0.2196	0.0104368	0.0603521
Glycolysis / Gluconeogenesis	7482.35	6540.72	6971.06	0.0923505	0.0117852	0.066699
Amino acid metabolism	698.194	676.987	639.924	-0.207179	0.0137669	0.0752905
Betalain biosynthesis	64.8194	35.9079	42.7258	1.06081	0.014043	0.0752905
Peptidases	10882.3	10633	10858.1	-0.104723	0.0144354	0.0752905
Translation proteins	5139.96	5114.71	5171.12	-0.147081	0.014385	0.0752905
Synthesis and degradation of ketone bodies	1496.75	1140.66	1210.66	0.365767	0.0155205	0.0793935
Caprolactam degradation	1051.06	692.645	759.141	0.686026	0.0184169	0.0890708
Glycerophospholipid metabolism	3500.57	3369.32	3428.75	-0.0956135	0.0177775	0.0890708
Non-homologous end-joining	316.847	219.553	250.188	0.709879	0.0181375	0.0890708
Carbon fixation pathways in prokaryotes	7322.82	6419.99	6665.55	0.0845373	0.0190993	0.0907215
Lipid metabolism	913.375	874.303	875.675	-0.122386	0.0208609	0.0940509
Membrane and intracellular structural molecules	4188.08	4174.3	4077.85	-0.161931	0.0206093	0.0940509
Vibrio cholerae pathogenic cycle	432.694	449.671	442.384	-0.230015	0.0203073	0.0940509
Chagas disease (American trypanosomiasis)	126.222	93.1842	102.968	0.504042	0.0214127	0.0949294
Bladder cancer	95.7639	70.8158	77.6063	0.555277	0.0222561	0.097051
D-Alanine metabolism	702.722	707.474	735.192	-0.156803	0.0230827	0.0974603
Ribosome Biogenesis	8706.06	8586.93	8760.62	-0.137219	0.0227709	0.0974603
Secretion system	9889.36	9960.25	9809.82	-0.167526	0.0241099	0.100207
Ubiquitin system	252.653	193.329	212.357	0.369519	0.0264303	0.108161
Taurine and hypotaurine metabolism	1131.35	978.092	1032.98	0.107442	0.0273423	0.108553
Xylene degradation	306.625	224.158	244.947	0.436979	0.0271338	0.108553
Cell division	467.361	478.263	459.349	-0.221513	0.0364455	0.124288
Cytochrome P450	57.3056	27.2895	34.7163	1.36195	0.0335999	0.124288
Cytoskeleton proteins	1503.5	1505.84	1499.16	-0.120914	0.0329967	0.124288
Glycosyltransferases	2901.79	2522.14	2666.69	0.0966631	0.0358245	0.124288
Glyoxylate and dicarboxylate metabolism	4800.53	4166.83	4253.53	0.135913	0.0349016	0.124288
Meiosis - yeast	374.667	269.329	293.55	0.531114	0.0358376	0.124288
Naphthalene degradation	1654.61	1269.68	1329.76	0.30956	0.0351729	0.124288
Phenylalanine metabolism	2534.43	2112.42	2184.74	0.247295	0.0319194	0.124288
Plant-pathogen interaction	869.819	864.947	867.677	-0.110433	0.0336877	0.124288
RNA degradation	3060	2956.97	3031.61	-0.0880231	0.0323831	0.124288
Tyrosine metabolism	2971.21	2509.33	2590.02	0.201954	0.036128	0.124288
Cell cycle - Caulobacter	3221.4	3157.75	3206.09	-0.104203	0.0382033	0.128132
Replication, recombination and repair proteins	5097.94	4942.2	5079.75	-0.119375	0.0385359	0.128132
Aminobenzoate degradation	2604.57	2025.09	2102.96	0.267749	0.0400104	0.131392
ABC transporters	19241.7	19574.3	19498.2	-0.157937	0.0436329	0.140129
Epithelial cell signaling in Helicobacter pylori infection	309.472	355.842	355.067	-0.407274	0.0437245	0.140129
General function prediction only	24675.6	22253.8	23146.5	0.0399661	0.0563427	0.173672
Linoleic acid metabolism	307.194	239.079	252.276	0.319333	0.0555853	0.173672
Pyruvate metabolism	8332.75	7174.58	7526.1	0.0872268	0.0568026	0.173672
Valine, leucine and isoleucine biosynthesis	4617.93	4064.03	4208.98	0.0829772	0.0558375	0.173672
Alzheimer's disease	572.778	590.934	565.951	-0.176581	0.057485	0.173762
Peptidoglycan biosynthesis	4514.9	4454.05	4611.48	-0.10841	0.0626425	0.187224
Dioxin degradation	362.097	266.316	297.463	0.314664	0.0645818	0.190045
Restriction enzyme	813.056	904.026	902.402	-0.392768	0.0650153	0.190045
Oxidative phosphorylation	8516.32	7720.71	7895.76	0.0576315	0.067071	0.192364
Vibrio cholerae infection	20.1389	21.5921	19.1256	-0.819965	0.0672549	0.192364
Pantothenate and CoA biosynthesis	4002.61	3569.51	3719.72	0.0630459	0.0686668	0.194312
Amino acid related enzymes	8783.31	8401.84	8633.02	-0.0649592	0.07296	0.20216
MAPK signaling pathway - yeast	229.569	227.079	215.475	-0.186762	0.072578	0.20216
Chlorocyclohexane and chlorobenzene degradation	689.611	518.105	558.849	0.450727	0.0765568	0.208753
Nitrogen metabolism	5459.08	4857.24	5025.21	0.0573328	0.0769088	0.208753
Bacterial chemotaxis	1921.26	2033.82	1857.66	-0.332668	0.0795383	0.211572
Cardiac muscle contraction	130.028	153.461	127.987	-0.464314	0.079323	0.211572
Function unknown	10682.9	10193.3	10319.8	-0.0718524	0.0824155	0.217055
Toluene degradation	1358.72	1141.47	1182.24	0.172331	0.0864466	0.225439
Glycan biosynthesis and metabolism	314.403	346.539	321.252	-0.378547	0.0873099	0.22548
Amyotrophic lateral sclerosis (ALS)	613.236	488.618	495.869	0.280177	0.0930654	0.233541
Signal transduction mechanisms	2300.61	2274.18	2315.93	-0.0969471	0.0916175	0.233541
Styrene degradation	732.042	609.368	625.125	0.266111	0.0929415	0.233541
Other transporters	1493.69	1522.92	1493.02	-0.164678	0.0984264	0.240197
Photosynthesis - antenna proteins	54.5	89.7105	63.8751	-1.34019	0.0981695	0.240197
Translation factors	3109.25	3038.68	3138.23	-0.0967288	0.097676	0.240197
Protein kinases	2897.36	2481.45	2546.48	0.134825	0.0994553	0.240501
Flavonoid biosynthesis	99.2222	72.1842	76.4114	0.389386	0.10053	0.24091
Bacterial motility proteins	5387.5	5544.41	5152.53	-0.270558	0.102114	0.242249
DNA replication proteins	6494.64	6421.79	6664.53	-0.103715	0.10291	0.242249
Carbon fixation in photosynthetic organisms	3472.28	3334.49	3415.79	-0.0730564	0.108121	0.252282
Zeatin biosynthesis	288.139	286.961	299.252	-0.129793	0.109686	0.253708
Sporulation	554.278	568.684	555.158	-0.31773	0.111635	0.255991
alpha-Linolenic acid metabolism	253.972	203.947	210.75	0.289898	0.116169	0.26411
Drug metabolism - cytochrome P450	1288.83	1056.39	1074.76	0.292979	0.128392	0.284299
Glycerolipid metabolism	2377.89	2085.86	2234.71	0.0773034	0.129324	0.284299
Phosphotransferase system (PTS)	1666.49	1802.79	1921	-0.37124	0.127668	0.284299
Steroid biosynthesis	156.083	109.579	114.598	0.482429	0.126656	0.284299
Cellular antigens	434.194	451.908	444.858	-0.140842	0.131303	0.286283
Other ion-coupled transporters	8480.24	8206.41	8510.98	-0.090868	0.134562	0.291004
Protein export	4003.76	3795.39	3915.36	-0.0632232	0.141986	0.304583
D-Glutamine and D-glutamate metabolism	939.472	921.803	945.461	-0.0829765	0.146955	0.307796
Mismatch repair	4791.96	4623.28	4786.79	-0.0780336	0.14526	0.307796
One carbon pool by folate	3146.19	3047.59	3130.32	-0.0702892	0.146525	0.307796
D-Arginine and D-ornithine metabolism	107.417	81.5789	90.1813	0.292162	0.149169	0.308346
Glycine, serine and threonine metabolism	6001.94	5450.79	5665.47	0.0538558	0.149536	0.308346
Aminoacyl-tRNA biosynthesis	6747.86	6512.41	6751.32	-0.0778268	0.15294	0.312938
Transporters	35014.3	34380.4	35305.4	-0.0842007	0.154612	0.313945
Homologous recombination	5706.6	5486.04	5678.28	-0.0777481	0.161322	0.325089
RNA polymerase	1063.17	1024.67	1069.13	-0.079671	0.163991	0.327983
Terpenoid backbone biosynthesis	3945.51	3506.55	3685.46	0.0566213	0.166757	0.331026
Biosynthesis of type II polyketide backbone	4.34722	1.75	1.38147	1.74627	0.173486	0.341832
Bacterial toxins	858.194	862.053	978.551	-0.202357	0.174794	0.341876
Protein processing in endoplasmic reticulum	447.556	368.079	380.871	0.196237	0.178568	0.346708
Selenocompound metabolism	2606.46	2315.89	2411.85	0.0467107	0.185378	0.357322
Metabolism of xenobiotics by cytochrome P450	1147.36	965.684	973.501	0.244891	0.190964	0.362831
Nucleotide excision repair	2701.49	2438.46	2579.1	0.058715	0.189846	0.362831
DNA replication	4036.51	3869.95	4032.71	-0.0658878	0.19747	0.372532
Phosphatidylinositol signaling system	787.167	717.829	748.117	0.0568698	0.199146	0.373047
Ascorbate and aldarate metabolism	1351.53	1162.8	1240.57	0.147145	0.204791	0.37694
Parkinson's disease	248.514	274.684	234.887	-0.34471	0.203202	0.37694
Streptomycin biosynthesis	2052.17	1804.22	1885.95	0.0813526	0.205475	0.37694
Biosynthesis of ansamycins	406.986	401.868	407.095	-0.0976916	0.211216	0.382201
Pentose and glucuronate interconversions	2379.18	2131.89	2272.2	0.0894216	0.21067	0.382201
Mineral absorption	103.333	115.079	113.376	-0.291768	0.220978	0.397163
Others	4750.69	4324.37	4548.21	0.0403281	0.236133	0.421553
Histidine metabolism	3544.33	3144.91	3227.06	0.0660863	0.239165	0.424119
Apoptosis	201.472	218.145	198.7	-0.279814	0.242596	0.424701
Glycosphingolipid biosynthesis - globo series	162.542	201.789	198.963	-0.343251	0.244283	0.424701
Phenylalanine, tyrosine and tryptophan biosynthesis	4937.31	4624.99	4718.31	-0.0336671	0.24351	0.424701
Bile secretion	2.66667	2.97368	2.66695	-0.631007	0.247496	0.427494
beta-Lactam resistance	105.097	105.816	126.386	-0.352936	0.253385	0.429607
Flagellar assembly	1988.46	2054.87	1910.65	-0.312171	0.25223	0.429607
Other glycan degradation	418.75	535.724	549.654	-0.316868	0.253565	0.429607
Penicillin and cephalosporin biosynthesis	136.569	111.632	118.245	0.261981	0.255338	0.429872
Porphyrin and chlorophyll metabolism	5639.76	5324.82	5221	-0.0785791	0.258094	0.43178
Prenyltransferases	1689.07	1585.39	1624.02	-0.045606	0.260643	0.433319
Glycosphingolipid biosynthesis - ganglio series	95.6528	124.737	123.766	-0.368139	0.264296	0.433968
Nicotinate and nicotinamide metabolism	3043.1	2821.83	2907.74	0.0286078	0.263279	0.433968
Amino sugar and nucleotide sugar metabolism	6832.99	6485.74	6766.05	-0.0530861	0.26758	0.434528
Protein folding and associated processing	4907.01	4656.97	4756.32	-0.0353848	0.271171	0.434528
Ribosome	14274.4	13679.4	14278.4	-0.0612934	0.269016	0.434528
Thiamine metabolism	2114.49	2032.89	2096.88	-0.0567499	0.270299	0.434528
Tropane, piperidine and pyridine alkaloid biosynthesis	879.792	786.842	804.619	0.093318	0.273925	0.436312
Inositol phosphate metabolism	1197.81	1082.91	1141.63	0.0823983	0.282699	0.446673
Type II diabetes mellitus	281.25	268.013	280.681	-0.088738	0.283788	0.446673
Atrazine degradation	236.389	262.079	248.772	-0.298288	0.286742	0.448667
Arginine and proline metabolism	6997.5	6365.88	6543.68	0.0377948	0.290518	0.451917
Biotin metabolism	1043.08	967.211	977.495	-0.0680125	0.294161	0.452748
Renal cell carcinoma	198.639	174.224	182.535	0.117681	0.294457	0.452748
Staphylococcus aureus infection	541.069	516	679.031	-0.379221	0.297649	0.455026
Riboflavin metabolism	1389.14	1318.46	1346.53	-0.0383684	0.305713	0.464684
Ion channels	154.097	165.934	171.391	-0.212421	0.309478	0.467363
Protein digestion and absorption	61.7778	81.6711	82.3459	-0.357586	0.31099	0.467363
C5-Branched dibasic acid metabolism	1802.71	1531.39	1574.03	0.111347	0.319558	0.477541
Alanine, aspartate and glutamate metabolism	5691.47	5294.96	5479.69	0.023668	0.337338	0.496966
Drug metabolism - other enzymes	1718.1	1608.97	1743.95	0.0578905	0.338161	0.496966
Lysosome	197.931	255.526	257.7	-0.287134	0.33448	0.496966
Arachidonic acid metabolism	506.958	473.855	477.492	-0.0605981	0.358295	0.523662
Huntington's disease	802.194	705.118	698.169	0.0943097	0.362122	0.526363
Nucleotide metabolism	455.167	422.132	466.768	0.0902381	0.371413	0.534377
Pertussis	281.861	308.526	303.732	-0.23558	0.371653	0.534377
Insulin signaling pathway	436.819	401.421	404.143	-0.0706739	0.379747	0.540264
Lysine biosynthesis	4025.56	3615.88	3740.07	0.0453905	0.37981	0.540264
Folate biosynthesis	2992.17	2813.75	2885.27	-0.0299876	0.386983	0.54738
Galactose metabolism	2664.56	2595.26	2795.57	-0.0731671	0.390668	0.54738
Germination	41.0278	39.7895	35.8212	-0.483882	0.390985	0.54738
Carbohydrate digestion and absorption	68.8889	73.1184	77.717	-0.255342	0.397261	0.553253
Biosynthesis of type II polyketide products	1.34722	1.60526	1.28464	-0.69269	0.404216	0.560008
Pentose phosphate pathway	4755.26	4355.68	4603.22	0.0255981	0.411568	0.567238
Pyrimidine metabolism	10961	10455	10979.2	-0.0393999	0.431123	0.591128
Nitrotoluene degradation	355.306	312.355	320.19	0.142554	0.433966	0.591974
N-Glycan biosynthesis	121.861	131.421	131.237	-0.18238	0.446778	0.606341
mRNA surveillance pathway	0.666667	0.0263158	0.376917	1.85677	0.44974	0.607263
Cysteine and methionine metabolism	5478.01	5103.46	5260.44	-0.0227227	0.457779	0.608846
Leishmaniasis	0.180556	0.131579	0.373642	1.38674	0.457748	0.608846
VEGF signaling pathway	0.180556	0.131579	0.373642	1.38674	0.457748	0.608846
Colorectal cancer	118.125	120.947	106.311	-0.215113	0.470475	0.6091
Glycosaminoglycan degradation	146.069	192.474	204.467	-0.229675	0.47293	0.6091
p53 signaling pathway	118.125	120.947	106.311	-0.215113	0.470475	0.6091
RIG-I-like receptor signaling pathway	32.4861	28.8816	32.0193	0.212793	0.471371	0.6091
Toxoplasmosis	118.208	121.026	106.351	-0.216109	0.468425	0.6091
Transcription factors	8316.12	7980.82	8263.12	-0.0398549	0.473999	0.6091
Viral myocarditis	118.125	120.947	106.311	-0.215113	0.470475	0.6091
Influenza A	118.5	121.013	106.494	-0.211865	0.47728	0.610368
Ubiquinone and other terpenoid-quinone biosynthesis	1851.89	1770.59	1754.7	-0.0742233	0.482566	0.614175
Small cell lung cancer	118.306	121.079	106.684	-0.206848	0.486689	0.616473
Novobiocin biosynthesis	911.389	817.908	840.129	0.0575256	0.489708	0.617357
Flavone and flavonol biosynthesis	8.55556	8.56579	10.4774	0.290193	0.501023	0.628642
Electron transfer carriers	235.597	240.092	240.548	-0.12463	0.505641	0.631458
Methane metabolism	6261.75	5757.62	6005.47	0.0227141	0.514001	0.638898
NOD-like receptor signaling pathway	181.986	175.421	177.194	-0.077624	0.532756	0.659131
DNA repair and recombination proteins	18564.9	17422.7	18145	-0.0231175	0.542559	0.668151
Hypertrophic cardiomyopathy (HCM)	5.625	5.5	5.01119	-0.297796	0.55548	0.671626
Primary immunodeficiency	383.278	355.039	366.327	0.0242126	0.554949	0.671626
Purine metabolism	14698.7	13861.8	14474.7	-0.0211451	0.553334	0.671626
Ribosome biogenesis in eukaryotes	418.875	381.974	394.463	0.0279465	0.554943	0.671626
Butirosin and neomycin biosynthesis	266.458	254.618	266.228	-0.0561622	0.558015	0.671638
Amoebiasis	57.1806	56.4868	59.2307	-0.15157	0.567879	0.674744
Fluorobenzoate degradation	370.319	319.395	323.504	0.161714	0.568206	0.674744
Systemic lupus erythematosus	6.95833	7.60526	8.3559	0.313537	0.566533	0.674744
Indole alkaloid biosynthesis	4.08333	3.92105	3.39231	-0.31204	0.580476	0.683215
Spliceosome	3.875	4.39474	4.26312	-0.56042	0.579414	0.683215
Shigellosis	5.23611	5.89474	3.26383	-0.551569	0.594932	0.697145
Calcium signaling pathway	0.722222	0.789474	0.744662	-0.48547	0.619739	0.723029
Antigen processing and presentation	172.056	163.224	161.938	-0.0659126	0.636224	0.726685
Carotenoid biosynthesis	375.194	298.118	316.569	0.111967	0.635614	0.726685
Progesterone-mediated oocyte maturation	172.056	163.224	161.938	-0.0659126	0.636224	0.726685
Prostate cancer	172.056	163.224	161.938	-0.0659126	0.636224	0.726685
Sphingolipid metabolism	416.194	414.329	425.991	-0.069187	0.636532	0.726685
Melanogenesis	4.47222	6.10526	4.58785	0.361119	0.649017	0.737772
Proximal tubule bicarbonate reclamation	251.792	231.737	233.443	0.0585363	0.681533	0.771437
Adipocytokine signaling pathway	708.903	651.829	663.288	-0.0296242	0.700257	0.789273
Phenylpropanoid biosynthesis	401.889	381.789	391.684	0.0541882	0.72121	0.80946
Transcription machinery	5067.89	4669.04	4846.51	0.0120139	0.741543	0.828783
Pathways in cancer	489.153	458.447	451.158	-0.0246904	0.746237	0.829745
Polyketide sugar unit biosynthesis	1032.44	912.632	931.824	0.0370352	0.748642	0.829745
GnRH signaling pathway	2.22222	4.94737	2.04785	0.316777	0.752917	0.83102
Fatty acid biosynthesis	3560.81	3205.68	3268.15	-0.0135901	0.760069	0.835448
Carbohydrate metabolism	741.819	701.855	729.715	-0.0294629	0.766596	0.835715
Sulfur relay system	2149.68	1985.53	2014.58	-0.0151866	0.765449	0.835715
Endocytosis	2.19444	4.94737	2.03311	0.297711	0.772984	0.835828
Fc gamma R-mediated phagocytosis	2.19444	4.94737	2.03311	0.297711	0.772984	0.835828
Energy metabolism	5568.97	5113.04	5180.56	0.0129782	0.810395	0.867077
Transcription related proteins	41.3333	34.2368	39.2083	-0.0780078	0.811662	0.867077
Vitamin B6 metabolism	1236.65	1158.64	1196.23	-0.0118217	0.807285	0.867077
Cyanoamino acid metabolism	1527.29	1431.67	1470.27	0.00974804	0.841873	0.895753
Inorganic ion transport and metabolism	1715.06	1620.72	1630.38	0.0102358	0.858743	0.910062
Fructose and mannose metabolism	3712.35	3444.11	3656.51	-0.00974365	0.868884	0.917155
Isoflavonoid biosynthesis	1.95833	1.69737	1.71461	0.10287	0.875457	0.920441
Lipoic acid metabolism	487.403	456.553	477.044	-0.0151537	0.882715	0.920793
Metabolism of cofactors and vitamins	1183.29	1074.74	1078.98	0.00711087	0.880455	0.920793
Bacterial invasion of epithelial cells	29.5417	30.5789	40.2829	-0.0504899	0.895671	0.930658
Pathogenic Escherichia coli infection	0.375	0.394737	0.402213	-0.131562	0.917788	0.949928
Biosynthesis of vancomycin group antibiotics	302.083	267.184	268.79	0.0114092	0.926934	0.955676
Isoquinoline alkaloid biosynthesis	391.736	372.329	369.942	-0.00795126	0.943452	0.96895
Ether lipid metabolism	137.097	121.145	128.101	-0.00702729	0.977981	0.983145
Ethylbenzene degradation	598.667	527.553	516.768	-0.00753092	0.965639	0.983145
Glutathione metabolism	2838.86	2615.67	2590.39	-0.0011532	0.979449	0.983145
Renin-angiotensin system	14.9306	13.5658	12.9959	0.0153931	0.968439	0.983145
Starch and sucrose metabolism	4090	3835.57	4014.49	-0.00170412	0.972655	0.983145
Two-component system	11734.5	10640	10724.8	0.0016696	0.978872	0.983145
Secondary bile acid biosynthesis	32.2917	30.6974	37.3297	0.00390481	0.990258	0.990258

## Sheet: 10_KEGG_pathways_dTBLs_HIVpos_v
Pathway	Abundance in HIV positive	Abundance in HIV negative	baseMean	Log fold-change	p-value	Adj. p-val
Phosphonate and phosphinate metabolism	367.671	374.55	370.494	-0.35465	2.88e-05	0.00805149
Linoleic acid metabolism	294.506	233.6	283.435	0.578192	0.000487022	0.037779
Lipopolysaccharide biosynthesis proteins	2657.86	2688.1	2569.14	-0.494076	0.000684419	0.037779
Proteasome	539.447	487.675	582.922	0.65037	0.000661391	0.037779
Tetracycline biosynthesis	641.259	615.25	591.312	-0.467553	0.000944475	0.037779
Tuberculosis	1376.78	1280.42	1425.67	0.262839	0.00082002	0.037779
Type I diabetes mellitus	433.6	410.025	458.843	0.247926	0.000391471	0.037779
General function prediction only	24565.4	23137.5	25069.7	0.0722846	0.00164533	0.0460242
Lipopolysaccharide biosynthesis	1969.92	2016.67	1912.92	-0.53058	0.0013383	0.0460242
PPAR signaling pathway	1816.56	1630	1844.13	0.377884	0.00155781	0.0460242
Vibrio cholerae pathogenic cycle	436.412	474.525	464.166	-0.359034	0.00180809	0.0460242
African trypanosomiasis	182.012	168.8	198.262	0.625165	0.00214207	0.0461369
Bisphenol degradation	614.6	531.375	626.848	0.610865	0.00197982	0.0461369
Aminobenzoate degradation	2545.59	2183.88	2499.6	0.413852	0.00657118	0.047452
Bacterial secretion system	5072.12	5050.25	5134.93	-0.231555	0.00429975	0.047452
Basal transcription factors	80.9294	73.6	92.5327	0.77312	0.00339731	0.047452
Base excision repair	3223.86	3070.47	3351.9	0.108577	0.0049466	0.047452
Benzoate degradation	4103.22	3569.82	4119.62	0.45754	0.00664261	0.047452
beta-Alanine metabolism	3176.85	2912.65	3320.89	0.488885	0.00491073	0.047452
Biosynthesis and biodegradation of secondary metabolites	856.294	807.225	920.697	0.416326	0.00446014	0.047452
Biosynthesis of unsaturated fatty acids	1861.54	1706.25	1901.3	0.360137	0.00648192	0.047452
Butanoate metabolism	6855.72	6215.55	6919.48	0.281723	0.00306275	0.047452
Carbon fixation pathways in prokaryotes	7319.6	6803.62	7426.02	0.136809	0.0024296	0.047452
Cell motility and secretion	1271.82	1222.2	1206.69	-0.374494	0.00417153	0.047452
Fatty acid metabolism	5764.26	5193.62	5934.3	0.485747	0.00646836	0.047452
Flavonoid biosynthesis	90.0471	78.95	94.3035	0.642547	0.00668626	0.047452
Function unknown	10770.9	10483.7	10828.6	-0.154961	0.00455828	0.047452
Geraniol degradation	1721.13	1478.22	1730.08	0.616504	0.0056477	0.047452
Glycolysis / Gluconeogenesis	7447.8	7093.77	7711.2	0.107165	0.00691042	0.047452
Limonene and pinene degradation	2096.46	1821.45	2143.38	0.679696	0.0050797	0.047452
Lipid biosynthesis proteins	7056.39	6571.18	7278.98	0.31255	0.00505049	0.047452
Membrane and intracellular structural molecules	4252.76	4208.4	4253.36	-0.234492	0.0050069	0.047452
Naphthalene degradation	1632.33	1398.5	1603.54	0.465087	0.00444071	0.047452
Peroxisome	2493.87	2282.43	2552.07	0.311643	0.00317149	0.047452
Propanoate metabolism	6733.89	6141.27	6858.21	0.330319	0.00679715	0.047452
Protein processing in endoplasmic reticulum	435.376	404.05	455.77	0.404029	0.00657291	0.047452
Secretion system	10068.5	10005.9	10036.9	-0.294697	0.00594052	0.047452
Sulfur metabolism	2558.79	2474.3	2708.88	0.172282	0.00299358	0.047452
Transcription factors	8469.71	8468.77	8706.17	-0.191159	0.00694833	0.047452
Ubiquitin system	244.388	227.85	261.544	0.390782	0.00524262	0.047452
Vibrio cholerae infection	17.8	30.375	23.6521	-1.53718	0.00376217	0.047452
Citrate cycle (TCA cycle)	5762.05	5425.95	5912.94	0.163192	0.00726689	0.0484459
ABC transporters	19846	19467.1	19542.8	-0.272877	0.00749421	0.0487995
Amino acid metabolism	672.059	639.35	647.111	-0.123943	0.0081703	0.0497322
Lysine degradation	3220.44	2892.3	3290.18	0.449648	0.00790179	0.0497322
Terpenoid backbone biosynthesis	3934.75	3644.35	3989.82	0.128346	0.00805836	0.0497322
Valine, leucine and isoleucine degradation	6281.26	5684.48	6420.34	0.413806	0.0086232	0.0513722
Tryptophan metabolism	4267.25	3863.53	4392.1	0.425242	0.00901932	0.0526127
Biosynthesis of siderophore group nonribosomal peptides	830.953	800.4	933.95	0.68387	0.00981572	0.0538903
RNA transport	321.988	317.65	319.935	-0.256984	0.00973434	0.0538903
Ubiquinone and other terpenoid-quinone biosynthesis	1879.85	1842.88	1909.13	-0.0986598	0.00945464	0.0538903
Stilbenoid, diarylheptanoid and gingerol biosynthesis	229.318	200.45	237.31	0.80993	0.010296	0.0554403
Cell division	478.859	462.45	463.061	-0.297814	0.0105105	0.0555269
Pores ion channels	2733.48	2695.15	2717.83	-0.308746	0.0108675	0.0563501
Chloroalkane and chloroalkene degradation	2175.59	2016.42	2290.36	0.448287	0.011069	0.0563513
Chromosome	9003.24	8772.67	9096.17	-0.159031	0.0115816	0.0568919
Glycan biosynthesis and metabolism	326.929	355.525	315.712	-0.748557	0.0114991	0.0568919
Bacterial chemotaxis	1927.04	2044.9	1900.32	-0.484357	0.0124664	0.0601694
Primary bile acid biosynthesis	268.2	248.875	294.642	0.78318	0.0126785	0.0601694
D-Alanine metabolism	722.871	690.825	717.735	-0.208018	0.0133011	0.0609696
Polycyclic aromatic hydrocarbon degradation	454.259	400.775	468.43	0.66099	0.0135004	0.0609696
Toluene degradation	1347.74	1283.5	1397.88	0.169409	0.0132254	0.0609696
Lipid metabolism	914.576	921.025	945.179	-0.145834	0.0140362	0.0623833
Electron transfer carriers	246.471	246.1	228.395	-0.381894	0.0153752	0.0637829
Other transporters	1480.78	1480.35	1521.83	-0.204104	0.0153242	0.0637829
Retinol metabolism	774.106	724.925	819.034	0.479515	0.0154901	0.0637829
Steroid hormone biosynthesis	488.329	455.05	542.872	0.858358	0.0153993	0.0637829
Transporters	35650.1	35037.4	35990.6	-0.181997	0.015008	0.0637829
Caffeine metabolism	60.6941	53.55	66.6535	1.03727	0.0177805	0.0721528
Prion diseases	222.541	206.625	235.21	0.634227	0.0185004	0.0740015
Signal transduction mechanisms	2320.25	2276.38	2359.84	-0.177702	0.0188022	0.0741496
Histidine metabolism	3546.26	3240.78	3546.6	0.151519	0.0199232	0.0756028
Photosynthesis proteins	2296.42	2306.45	2362.95	-0.166691	0.0194682	0.0756028
Synthesis and degradation of ketone bodies	1508.34	1324.15	1510.4	0.398753	0.0199807	0.0756028
Glutamatergic synapse	655.8	648.1	705.64	0.154447	0.0219444	0.0819258
Caprolactam degradation	1033.19	943.3	1081.35	0.590767	0.0252824	0.090909
Chaperones and folding catalysts	6587.33	6346.8	6561.72	-0.172169	0.0251615	0.090909
Nucleotide excision repair	2659.34	2517.28	2765.06	0.107954	0.025347	0.090909
Pantothenate and CoA biosynthesis	3966.06	3797.03	4104.8	0.0689722	0.0256493	0.090909
Oxidative phosphorylation	8534.4	8062.57	8654.9	0.0778803	0.0279948	0.0944456
Phosphotransferase system (PTS)	1749.21	1808.75	1689.53	-0.721064	0.0276636	0.0944456
Plant-pathogen interaction	877.412	858.975	884.699	-0.12707	0.0276077	0.0944456
Translation proteins	5148.64	4964.35	5150.39	-0.179519	0.0279964	0.0944456
Tyrosine metabolism	3014.42	2746.68	3020.87	0.241441	0.032508	0.10836
Peptidases	10825	10518.5	11027.5	-0.109205	0.0362139	0.119293
Chagas disease (American trypanosomiasis)	120.4	119	131.625	0.341117	0.0380912	0.124018
Glycerolipid metabolism	2380.62	2207.57	2424.3	0.105579	0.0385428	0.124046
Photosynthesis	2137.94	2133.8	2205.23	-0.133483	0.0397567	0.126499
Non-homologous end-joining	311.259	300.225	345.898	0.551939	0.0404269	0.127186
alpha-Linolenic acid metabolism	257.165	230.325	254.607	0.30293	0.0424742	0.130507
Amyotrophic lateral sclerosis (ALS)	617.035	567.8	625.207	0.281413	0.043429	0.130507
Cardiac muscle contraction	146.376	131.475	120.117	-0.661735	0.0426381	0.130507
Ethylbenzene degradation	594.353	475.975	535.835	0.319481	0.0451942	0.130507
Glycerophospholipid metabolism	3533.04	3322.43	3497.67	-0.0900488	0.0439873	0.130507
MAPK signaling pathway - yeast	225.494	220.85	221.527	-0.166947	0.0450247	0.130507
Selenocompound metabolism	2535.59	2447.18	2640.77	0.0718403	0.0452113	0.130507
Taurine and hypotaurine metabolism	1128.18	1058.78	1156.86	0.125275	0.0433978	0.130507
Meiosis - yeast	372.071	358.725	397.324	0.498264	0.0502978	0.142256
Valine, leucine and isoleucine biosynthesis	4586.54	4404.2	4722.6	0.0654019	0.0500935	0.142256
Nicotinate and nicotinamide metabolism	3046.76	2893.78	3116.92	0.0475649	0.0518176	0.145089
Inorganic ion transport and metabolism	1753.18	1746.97	1784.51	-0.116297	0.054029	0.149783
Bacterial motility proteins	5395.53	5274.02	5120.59	-0.381662	0.0563848	0.154782
Bladder cancer	97.4235	94.275	103.997	0.409146	0.0584392	0.158864
Ribosome Biogenesis	8746.82	8322.67	8701.57	-0.144975	0.0619149	0.166694
Pertussis	303.694	333.85	316.307	-0.624672	0.0628603	0.167627
Pyruvate metabolism	8305.95	7847.35	8450.38	0.0984787	0.064548	0.170504
Xylene degradation	310.518	290.4	315.316	0.34884	0.0653497	0.171008
Bacterial toxins	941.553	841.675	893.431	-0.256938	0.0668193	0.173235
Cell cycle - Caulobacter	3245.64	3106.78	3234.97	-0.124805	0.0700877	0.180042
C5-Branched dibasic acid metabolism	1773.26	1705.9	1833.45	0.10783	0.0759549	0.19334
Betalain biosynthesis	63.0824	61.15	69.6807	0.77856	0.0792645	0.199946
Streptomycin biosynthesis	2006.56	1978.9	2110.87	0.113584	0.0802543	0.200636
Glyoxylate and dicarboxylate metabolism	4841.67	4540.2	4914.23	0.126349	0.0810897	0.20093
Proximal tubule bicarbonate reclamation	241.424	215.7	246.816	0.1956	0.0836395	0.20543
Cytochrome P450	54.2471	50.425	60.748	1.0284	0.0863277	0.210189
Steroid biosynthesis	149.576	148.525	168.438	0.530539	0.0870936	0.210226
Dioxin degradation	362.859	333.925	364.68	0.243253	0.0912464	0.218368
Phenylalanine metabolism	2572.12	2421.45	2655.27	0.207884	0.0929692	0.220605
Protein kinases	2901.31	2733.22	2944.65	0.140983	0.0966519	0.227416
Alzheimer's disease	598.918	542.2	561.478	-0.206076	0.098216	0.229171
Carbohydrate metabolism	750.788	766.475	787.057	-0.117354	0.102805	0.237895
Cellular antigens	447.565	431.525	446.29	-0.188815	0.104279	0.239329
Biosynthesis of type II polyketide backbone	2.12941	2.525	1.3937	2.2983	0.110471	0.251479
Adipocytokine signaling pathway	697.6	620.375	685.904	0.100314	0.118262	0.264908
Ion channels	154.012	155.4	156.143	-0.467231	0.117795	0.264908
beta-Lactam resistance	121.306	108.45	112.114	-0.533022	0.121665	0.270366
D-Arginine and D-ornithine metabolism	110.906	99.7	110.753	0.298832	0.123156	0.270995
Styrene degradation	737.824	672.475	751.448	0.257585	0.123884	0.270995
Galactose metabolism	2685.62	2686.5	2816.37	-0.123881	0.125273	0.271911
Alanine, aspartate and glutamate metabolism	5663.68	5449.7	5885.06	0.0340547	0.126564	0.272599
Parkinson's disease	270.282	238.725	227.548	-0.506346	0.127643	0.272825
Replication, recombination and repair proteins	5126.14	4730.85	5008.73	-0.0861624	0.128722	0.273046
Chlorocyclohexane and chlorobenzene degradation	684.059	673.55	752.819	0.330239	0.133876	0.279741
Nitrogen metabolism	5445.34	5251.45	5615.66	0.0561457	0.133243	0.279741
Antigen processing and presentation	167.694	153.7	169.413	0.178568	0.140975	0.281951
Biosynthesis of ansamycins	396.247	402.525	413.651	-0.15912	0.138693	0.281951
DNA replication proteins	6527.58	6296.38	6648.87	-0.122822	0.138655	0.281951
Methane metabolism	6208.75	5851.6	6337.22	0.0483298	0.137934	0.281951
Progesterone-mediated oocyte maturation	167.694	153.7	169.413	0.178568	0.140975	0.281951
Prostate cancer	167.694	153.7	169.413	0.178568	0.140975	0.281951
RNA degradation	3061.14	2934.97	3103.82	-0.0777192	0.144345	0.286643
Flagellar assembly	1983.05	2007.67	1878.81	-0.480383	0.151105	0.297954
Protein folding and associated processing	4952.25	4684.32	4963.33	-0.0526333	0.154377	0.302277
Drug metabolism - cytochrome P450	1329.14	1230.1	1335.31	0.249798	0.15761	0.30435
Peptidoglycan biosynthesis	4544.15	4321.4	4588.08	-0.0984278	0.157489	0.30435
Glycosphingolipid biosynthesis - ganglio series	103.482	133.7	127.335	-0.542036	0.175621	0.336808
Glycosphingolipid biosynthesis - globo series	166.424	213.85	204.426	-0.503499	0.177049	0.337237
Tropane, piperidine and pyridine alkaloid biosynthesis	882.2	855.25	915.878	0.0707211	0.187854	0.3554
Epithelial cell signaling in Helicobacter pylori infection	316.459	296.9	304.655	-0.3899	0.196897	0.367541
Transcription related proteins	40.9882	40.725	39.2971	-0.486552	0.196791	0.367541
Cytoskeleton proteins	1504.69	1481.83	1558.27	-0.0903832	0.212922	0.389661
Polyketide sugar unit biosynthesis	1001.65	990.45	1048.5	0.108811	0.211572	0.389661
Type II diabetes mellitus	273.741	268.375	283.268	-0.0888755	0.211326	0.389661
Other glycan degradation	450.165	556.5	545.238	-0.459795	0.218329	0.396962
Amino sugar and nucleotide sugar metabolism	6755.24	6741.25	7121.44	-0.0604467	0.229708	0.408481
Lysosome	217.118	272.975	268.627	-0.444514	0.2305	0.408481
Riboflavin metabolism	1400.29	1344.22	1423.84	-0.0412662	0.230486	0.408481
Translation factors	3102.86	2971.22	3152.95	-0.0863561	0.227153	0.408481
Metabolism of xenobiotics by cytochrome P450	1186.81	1096.33	1181.71	0.199436	0.233259	0.41077
Carbon fixation in photosynthetic organisms	3433.51	3325.65	3507.76	-0.0641545	0.235781	0.410892
Lysine biosynthesis	3981.33	3895.45	4169.78	0.0332497	0.23773	0.410892
Renal cell carcinoma	196.976	187.45	205.746	0.083051	0.236483	0.410892
Bile secretion	2.38824	3.15	2.98821	-0.810116	0.245281	0.420063
Glycosyltransferases	2872.25	2823.8	3010.67	0.065454	0.246037	0.420063
Hypertrophic cardiomyopathy (HCM)	5.50588	5.975	5.19281	-0.740254	0.265575	0.450672
Other ion-coupled transporters	8549.44	8078.62	8702.07	-0.0846419	0.267518	0.451235
Bacterial invasion of epithelial cells	40.9765	31.85	33.4128	-0.500431	0.269849	0.452441
Melanogenesis	6.25882	8.825	6.67515	-0.962967	0.274106	0.456843
Staphylococcus aureus infection	652.718	494.975	550.164	-0.453433	0.291138	0.482359
Primary immunodeficiency	383.012	366.325	393.804	0.0477356	0.298418	0.491513
Amino acid related enzymes	8765.76	8349.85	8893.27	-0.0436864	0.307991	0.495618
Carbohydrate digestion and absorption	65.1412	75.75	77.8197	-0.401617	0.305204	0.495618
DNA replication	4027.33	3853.35	4104.35	-0.0637377	0.305775	0.495618
Transcription machinery	4999.35	4816.07	5192.87	0.0394571	0.306457	0.495618
Shigellosis	9.04706	6.65	3.7707	-1.2108	0.32215	0.515441
Restriction enzyme	824	738.9	778.05	-0.311594	0.334154	0.531609
Carotenoid biosynthesis	362.8	356.575	381.664	0.171965	0.344734	0.53329
Colorectal cancer	123.353	106.775	106.789	-0.341193	0.344137	0.53329
p53 signaling pathway	123.353	106.775	106.789	-0.341193	0.344137	0.53329
Toxoplasmosis	123.424	106.925	106.861	-0.343091	0.341467	0.53329
Viral myocarditis	123.353	106.775	106.789	-0.341193	0.344137	0.53329
Influenza A	123.353	106.775	106.913	-0.3378	0.348997	0.536918
Small cell lung cancer	123.765	107.025	107.224	-0.334539	0.351409	0.537674
Mineral absorption	105.729	99.975	107.06	-0.2973	0.355178	0.540489
Phenylalanine, tyrosine and tryptophan biosynthesis	4888.91	4718.32	5012.16	-0.0306592	0.357459	0.541019
Protein digestion and absorption	65.6235	78.325	78.8315	-0.397101	0.365586	0.550344
Huntington's disease	825.812	759.325	803.412	0.0788188	0.37298	0.558473
Others	4775.65	4580.52	4912.78	0.0295489	0.382058	0.569022
Novobiocin biosynthesis	901.224	891.425	949.012	0.035534	0.391375	0.579815
Indole alkaloid biosynthesis	3.38824	3.975	3.54112	-0.579674	0.397277	0.581205
Photosynthesis - antenna proteins	41.3059	59.925	50.1496	-0.849006	0.398541	0.581205
Ribosome biogenesis in eukaryotes	416.118	388.55	420.287	0.0490627	0.396315	0.581205
Biosynthesis of vancomycin group antibiotics	293.753	285.075	297.193	0.083253	0.40536	0.585561
Glutathione metabolism	2849.41	2694.12	2819.86	-0.0348978	0.408056	0.585561
NOD-like receptor signaling pathway	180.6	168.1	182.443	0.0999228	0.409016	0.585561
Thiamine metabolism	2087.79	2026.12	2172.75	-0.0493364	0.409893	0.585561
Atrazine degradation	251.447	228.35	239.636	-0.243074	0.435321	0.600443
Cysteine and methionine metabolism	5363.29	5267.55	5606.46	-0.0268279	0.43414	0.600443
Homologous recombination	5668.66	5414.77	5777.9	-0.0519581	0.429565	0.600443
Mismatch repair	4768	4527.43	4836.79	-0.0488184	0.431809	0.600443
Sporulation	458.376	536.275	556.186	-0.190289	0.429215	0.600443
Sulfur relay system	2161.98	2056.15	2158.1	-0.0400449	0.426607	0.600443
Systemic lupus erythematosus	8.18824	9.45	8.04076	0.493653	0.43336	0.600443
Glycosaminoglycan degradation	171.459	191.825	196.705	-0.310172	0.439632	0.603417
Lipoic acid metabolism	500.376	471.325	502.586	-0.0476483	0.44588	0.60605
Pentose and glucuronate interconversions	2423.79	2362.53	2529.4	0.0564901	0.445789	0.60605
Nucleotide metabolism	460.753	463.475	493.111	-0.0657584	0.455228	0.614753
RNA polymerase	1065.06	1001.12	1072.61	-0.0486381	0.456673	0.614753
Calcium signaling pathway	0.776471	1.025	0.879265	-0.834745	0.466799	0.625376
Apoptosis	208.706	176.35	185.366	-0.225085	0.478816	0.638422
Protein export	3990.05	3775.12	4023.07	-0.0361712	0.489193	0.649167
N-Glycan biosynthesis	115.6	118.575	123.973	-0.210854	0.506082	0.66841
Aminoacyl-tRNA biosynthesis	6727.51	6320	6778.37	-0.0405861	0.513169	0.674588
Inositol phosphate metabolism	1210.68	1233.3	1285.51	-0.0470122	0.551298	0.721324
Insulin signaling pathway	415.835	416.9	435.147	-0.0394818	0.560573	0.730049
Endocytosis	4.85882	6.975	2.59744	-0.682608	0.576608	0.730544
Fc gamma R-mediated phagocytosis	4.85882	6.975	2.59744	-0.682608	0.576608	0.730544
Germination	27.5412	40.575	40.6179	-0.387619	0.570106	0.730544
GnRH signaling pathway	4.88235	6.975	2.59744	-0.682608	0.576608	0.730544
Pyrimidine metabolism	10987.8	10513.1	11259.9	-0.0307504	0.575747	0.730544
Spliceosome	3.23529	4.25	4.3079	-0.702995	0.572218	0.730544
Glycine, serine and threonine metabolism	6056.2	5864.65	6259.39	0.00950129	0.587716	0.741263
Sphingolipid metabolism	408.988	456.7	474.357	-0.0727489	0.609654	0.762068
Starch and sucrose metabolism	3980.15	4055.03	4300.54	-0.0248203	0.608973	0.762068
Zeatin biosynthesis	289.788	273.3	294.862	-0.0468744	0.615338	0.765754
Renin-angiotensin system	14.2588	10.65	12.6341	0.23703	0.629819	0.780307
D-Glutamine and D-glutamate metabolism	931.012	868.9	940.66	-0.0345343	0.63657	0.781952
Vitamin B6 metabolism	1246.59	1189.1	1266.81	-0.0189969	0.636732	0.781952
Arginine and proline metabolism	7048.11	6817.85	7252.23	0.0167568	0.643479	0.783366
Pentose phosphate pathway	4722.88	4637.45	4922.5	-0.0120232	0.643329	0.783366
Penicillin and cephalosporin biosynthesis	137.776	139.75	146.086	0.0665049	0.659233	0.79907
Drug metabolism - other enzymes	1739.86	1695.25	1838.25	0.0248058	0.675936	0.807418
Leishmaniasis	0.411765	0.25	0.434934	0.846144	0.677655	0.807418
Pathways in cancer	488.424	448.1	482.427	0.0237724	0.670439	0.807418
VEGF signaling pathway	0.411765	0.25	0.434934	0.846144	0.677655	0.807418
Ascorbate and aldarate metabolism	1418.68	1364.83	1439.08	0.039751	0.697081	0.818626
One carbon pool by folate	3127.76	2958.65	3183.89	-0.0216689	0.698756	0.818626
Prenyltransferases	1666.66	1598.05	1713.87	0.0170672	0.691923	0.818626
Secondary bile acid biosynthesis	33.2118	31.35	35.1646	-0.153634	0.697695	0.818626
Phosphatidylinositol signaling system	796.871	763.425	809.813	0.0186742	0.7031	0.820283
Porphyrin and chlorophyll metabolism	5527.14	5351.55	5653.74	0.0152762	0.711428	0.826555
Isoflavonoid biosynthesis	2.08235	2.25	2.18282	-0.266884	0.735367	0.850838
Fluorobenzoate degradation	374.682	371.65	404.261	0.077703	0.742669	0.852243
Isoquinoline alkaloid biosynthesis	389.306	390.8	408.433	-0.0249205	0.742486	0.852243
Ribosome	14257.5	13432	14467.3	-0.0202586	0.74886	0.85584
Pathogenic Escherichia coli infection	0.658824	0.4	0.38023	-0.529358	0.767507	0.873585
RIG-I-like receptor signaling pathway	28.4471	33.975	37.755	-0.0985136	0.782823	0.88741
Two-component system	11906.9	11273.5	11773.6	-0.0172964	0.787032	0.888584
Amoebiasis	61.8941	48.625	54.3129	-0.0872721	0.792161	0.890784
Phenylpropanoid biosynthesis	394.059	406.875	424.513	0.0326533	0.821211	0.916092
Purine metabolism	14708	14017.1	15050.8	-0.008955	0.819629	0.916092
Butirosin and neomycin biosynthesis	255.894	254.325	278.072	0.0197004	0.830882	0.923203
Biosynthesis of type II polyketide products	1.42353	1.85	1.13895	0.203735	0.847929	0.938419
Biotin metabolism	1028.31	976.45	1040.93	-0.00991315	0.875885	0.956176
Cell cycle	0	0	0.123701	0.329565	0.910523	0.956176
Energy metabolism	5557.98	5406.43	5738.58	0.0046982	0.913406	0.956176
Ether lipid metabolism	141.118	147.9	159.056	-0.0228206	0.919256	0.956176
Fatty acid biosynthesis	3550.52	3414.8	3577.43	-0.00704883	0.873027	0.956176
Flavone and flavonol biosynthesis	7.49412	11.05	13.2772	0.0526822	0.922027	0.956176
Folate biosynthesis	3035.99	2829.12	3037.58	-0.00436496	0.907498	0.956176
Fructose and mannose metabolism	3663.01	3601.03	3848.13	-0.00583448	0.917514	0.956176
G protein-coupled receptors	0.0117647	0.025	0.0137629	-0.331419	0.910022	0.956176
Hematopoietic cell lineage	0.411765	1.15	0.379532	-0.248276	0.888387	0.956176
Hepatitis C	0	0	0.123701	0.329565	0.910523	0.956176
Measles	0	0	0.123701	0.329565	0.910523	0.956176
mRNA surveillance pathway	0.129412	0.05	0.166102	0.423514	0.885172	0.956176
mTOR signaling pathway	0	0	0.123701	0.329565	0.910523	0.956176
Nitrotoluene degradation	359.612	327.95	350.413	0.0164564	0.912547	0.956176
Other types of O-glycan biosynthesis	0.0588235	0.05	0.0325215	-0.403553	0.89055	0.956176
Phagosome	0	0	0.123701	0.329565	0.910523	0.956176
Chronic myeloid leukemia	0.0117647	0	0.00900393	-0.2004	0.945519	0.966224
DNA repair and recombination proteins	18461.3	17585.6	18909.5	-0.00366358	0.935229	0.966224
Notch signaling pathway	0.0117647	0	0.00900393	-0.2004	0.945519	0.966224
Wnt signaling pathway	0.0117647	0	0.00900393	-0.2004	0.945519	0.966224
Arachidonic acid metabolism	510.576	456.725	490.913	-0.00434236	0.95039	0.96767
Sesquiterpenoid biosynthesis	0.0823529	0.025	0.0491059	-0.154764	0.957913	0.971795
Various types of N-glycan biosynthesis	0.2	0.15	0.225501	0.134979	0.963289	0.973722
Cyanoamino acid metabolism	1527.72	1489.67	1585.99	0.0013785	0.979523	0.98657
Metabolism of cofactors and vitamins	1202.38	1126.55	1182.76	-0.000458337	0.990584	0.994134
Fatty acid elongation in mitochondria	0.129412	0.05	0.108195	0.00864198	0.997649	0.997649

[truncated: 1 more sheets: 11_KEGG_pathways_all_patients_o]
